# Supplementary material for: RNA Polymerase II-mediated transcription is required for repair of ribosomal DNA breaks in nucleolar caps, guarding against genomic instability
Source: Research Square preprint supplement (doi:10.21203/rs.3.rs-6938388/v1), 2025-07-18
Supplement: Supplementary file 1 [file 542b62ef2ded3f8f9510f5e7.xlsx]

## Sheet: Fig.1b
%	DMSO	BMH21	THZ1	ML-60218		Number of families	1
Exp1	28.96	24.93	10.3	7.98		Number of comparisons per family	6
Exp2	34.58	45.02	25.7	29.17		Alpha	0.05
Exp3	19.83	20.85	11.85	8.52
Exp4	35.56	34.16	22.48	32.24		Tukey's multiple comparisons test	Mean Diff,	95,00% CI of diff,	Below threshold?	Summary	Adjusted P Value
Exp5	19.46	20.68	9.79	16.41		DMSO vs. BMH21	-1.655	-9,049 to 5,739	No	ns	0.8406
Exp6	18.41	21.09	8.65	17.6		DMSO vs. THZ1	11.34	5,342 to 17,34	Yes	**	0.0035
						DMSO vs. ML-60218	7.48	-3,846 to 18,81	No	ns	0.1868
						BMH21 vs. THZ1	12.99	7,557 to 18,43	Yes	**	0.0012
						BMH21 vs. ML-60218	9.135	-0,9470 to 19,22	No	ns	0.0709
						THZ1 vs. ML-60218	-3.858	-12,34 to 4,620	No	ns	0.42

## Sheet: Fig.1c
	DMSO	THZ1	BMH21	ML-60218		Number of families	1
Exp1	4.092	2.412	3.111	2.167		Number of comparisons per family	6
Exp2	4.374	3.486	4.535	4.333		Alpha	0.05
Exp3	3.014	2.311	2.832	1.903
Exp4	4.01	3.435	4.021	4.129		Tukey's multiple comparisons test	Mean Diff,	95,00% CI of diff,	Below threshold?	Summary	Adjusted P Value
Exp5	3.628	2.578	3.415	3.08		DMSO vs. THZ1	0.959	0,3731 to 1,545	Yes	**	0.0068
Exp6	3.101	2.243	3.203	3.289		DMSO vs. BMH21	0.1837	-0,4465 to 0,8138	No	ns	0.7178
						DMSO vs. ML-60218	0.553	-0,6995 to 1,806	No	ns	0.4416
						THZ1 vs. BMH21	-0.7753	-1,091 to -0,4600	Yes	**	0.001
						THZ1 vs. ML-60218	-0.406	-1,305 to 0,4935	No	ns	0.4258
						BMH21 vs. ML-60218	0.3693	-0,3397 to 1,078	No	ns	0.3265

## Sheet: Fig.1d
DMSO	BMH21	THZ1	ML-60218			Number of families	1
1	1	1	3			Number of comparisons per family	3
1	2	1	4			Alpha	0.05
1	2	5	9
2	8	1	5			Dunnett's multiple comparisons test	Mean Diff,	95,00% CI of diff,	Below threshold?	Summary	Adjusted P Value
1	6	1	1			DMSO vs. BMH21	-0.1025	-0,3751 to 0,1701	No	ns	0.7231
5	2	2	13			DMSO vs. THZ1	0.8582	0,5008 to 1,216	Yes	****	<0,0001
2	4	2	4			DMSO vs. ML-60218	-0.1878	-0,4882 to 0,1125	No	ns	0.3337
5	1	1	1
5	2	3	3
1	4	1	4
1	3	1	9
1	6	5	5
1	1	1	1
3	7	1	13
1	1	2	4
1	2	2	1
4	1	1	1
1	1	3	4
2	7	1	1
1	2	2	1
1	4	1	1
1	1	2	1
2	2	1	2
1	2	2	3
5	8	1	6
2	6	2	2
5	2	1	4
5	4	1	10
1	1	2	8
1	2	1	1
1	4	1	1
1	3	5	4
3	6	1	1
1	1	3	4
1	7	1	1
4	1	1	1
1	2	1	1
2	1	2	1
5	1	1	2
1	7	1	3
1	2	5	6
2	4	1	2
4	1	3	4
7	1	1	10
4	6	6	8
2	5	6	1
4	2	5	1
3	3	6	4
1	16	5	3
1	7	6	2
2	3	2	2
5	7	1	2
8	3	1	3
1	3	2	4
5	29	1	1
1	1	1	3
7	1	1	7
1	6	1	3
1	5	6	3
5	2	1	1
1	3	1	1
1	16	6	1
2	7	1	2
4	3	1	10
7	7	1	4
4	3	5	1
2	3	1	2
4	29	3	4
3	3	3	1
1	1	1	8
1	1	1	3
2	5	1	10
5	2	5	6
8	2	1	1
1	1	3	1
5	1	3	2
1	3	1	4
7	5	1	3
1	1	1	2
1	1	1	2
4	5	1	2
6	1	1	3
2	7	1	4
7	3	1	1
1	3	1	3
1	2	1	7
5	3	1	3
1	1	2	3
2	1	1	1
8	5	1	1
1	2	2	1
4	2	3	2
6	1	2	10
2	1	2	4
7	3	1	1
1	5	1	2
1	1	2	4
5	1	1	1
1	5	1	8
2	1	2	3
8	7	3	10
1	3	2	6
4	3	2	1
1	2	1	1
1	1	1	2
1	1	1	4
1	4	7	8
2	4	1	3
4	6	4	4
1	3	1	8
1	2	1	3
1	6	4	4
1	2	11	3
2	2	1	1
1	3	1	4
6	1	3	3
2	2	7	1
2	4	1	4
1	2	4	5
1	1	1	1
1	3	1	1
4	3	4	8
2	1	11	3
3	3	1	5
1	1	1	1
2	1	3	1
1	4	1	8
1	4	1	3
1	6	3	2
1	3	3	1
6	2	1	1
2	6	1	9
2	2	2	2
1	2	7	1
1	3	3	2
1	1	1	1
4	2	1	1
2	4	1	2
3	2	1	1
1	1	1	4
2	3	1	1
1	3	3	3
1	1	3	6
1	3	1	2
1	2	1	1
2	2	2	1
1	1	7	9
3	4	3	2
3	2	1	1
11	3	1	2
1	1	1	1
2	1	1	1
1	1	1	2
3	3	1	1
3	1	1	4
11	3	2	1
1	2	1	3
3	6	3	6
1	1	7	1
11	4	4	2
10	7	2	8
5	4	2	2
9	7	3	1
1	3	2	2
4	1	1	8
1	3	5	2
5	2	1	1
3	7	1	2
1	2	1	5
1	3	1	1
4	1	2	2
2	7	1	5
1	4	3	6
3	1	7	2
1	1	4	2
11	2	2	12
10	1	2	6
5	2	3	3
9	2	2	1
1	1	1	2
4	4	5	2
1	2	1	5
5	3	1	1
3	1	6	2
1	1	4	6
1	1	1	2
4	3	6	2
2	1	4	12
4	3	1	6
5	2	1	3
4	6	2	1
5	1	1	2
5	4	3	2
5	7	1	5
14	4	1	1
8	7	1	2
2	3	1	3
5	1	2	1
7	3	1	4
1	2	3	2
4	7	1	1
5	2	1	4
4	3	3	2
5	1	1	1
5	7	2	1
5	4	2	9
14	1	1	4
8	1	1	1
2	2	1	2
5	1	5	5
7	3	2	2
1	4	3	4
1	3	1	1
5	1	2	1
3	1	2	1
1	4	1	1
7	4	1	3
1	3	1	1
1	3	5	4
2	4	2	2
1	1	2	1
3	5	2	4
6	3	1	2
3	1	6	1
1	4	1	1
5	2	1	9
3	3	8	4
1	4	1	1
7	3	1	2
1	1	1	5
1	1	4	2
2	4	2	4
1	4	2	1
3	3	1	1
6	3	6	1
3	4	1	1
1	1	1	2
1	5	8	6
4	3	1	2
5	1	1	2
3	4	1	1
1	2	4	1
5	6	1	1
2	1	1	1
3	6	2	2
3	1	5	3
2	4	6	5
1	4	1	2
2	4	1	2
1	1	1	1
3	5	6	5
4	2	1	1
3	1	1	3
1	3	1	5
10	1	7	2
4	1	4	6
4	2	1	2
11	6	5	2
2	1	1	1
1	6	1	1
3	1	1	1
1	4	2	1
9	4	5	2
1	4	6	3
3	1	1	5
1	5	1	2
1	2	1	2
4	1	6	1
5	3	1	5
3	1	1	1
1	1	1	3
5	2	7	5
2	3	4	5
3	1	1	1
3	4	5	7
2	1	1	1
1	1	2	8
2	1	1	1
1	1	2	2
3	5	1	3
4	7	3	3
3	1	1	1
1	2	3	5
10	6	4	2
4	2	4	7
4	3	5	1
11	2	1	1
2	1	1	4
1	4	1	3
3	2	1	9
1	2	2	6
9	4	1	10
1	6	2	1
3	7	1	4
4	3	2	6
1	1	1	1
3	1	3	2
1	3	1	5
4	3	3	1
1	2	4	2
2	1	4	1
1	3	5	5
2	1	1	1
1	4	1	7
2	1	1	1
6	1	1	8
6	1	2	1
5	1	1	2
1	5	1	3
2	7	1	3
4	1	2	1
2	2	1	5
4	6	1	2
1	2	1	7
3	3	1	1
1	2	1	1
4	1	4	4
1	4	2	3
2	2	1	9
1	2	1	6
2	4	2	10
1	6	1	1
2	7	1	4
6	3	1	6
6	1	1	1
5	1	1	2
1	3	4	5
2	3	2	1
4	2	3	2
2	1	1	1
1	4	2	1
2	2	3	3
1	3	1	1
1	1	1	3
7	1	2	2
1	2	2	2
1	1	3	2
4	5	2	5
1	1	2	4
4	2	1	3
2	5	3	3
1	1	1	14
2	3	2	1
1	3	3	2
2	4	1	10
8	2	1	1
2	5	2	1
9	2	2	1
1	5	3	1
8	1	2	7
7	1	2	4
5	4	1	6
2	1	3	1
3	5	1	2
5	1	3	3
1	6	3	1
1	1	1	1
1	9	1	3
1	7	2	1
2	4	4	3
1	2	3	2
1	3	3	2
7	1	5	2
1	1	3	5
1	2	2	4
4	1	1	3
1	5	3	3
4	1	1	14
2	2	3	1
1	5	3	2
2	1	1	10
1	3	1	1
2	3	2	1
8	4	4	1
2	2	3	1
9	5	3	7
1	2	5	4
8	5	3	6
7	1	2	1
5	1	1	2
2	4	7	3
3	1	1	1
5	5	1	1
1	1	3	2
1	6	2	3
1	1	2	3
3	9	1	1
1	7	2	7
2	1	2	1
3	2	8	1
2	1	5	2
1	1	7	3
1	3	1	3
1	1	1	1
3	3	3	7
3	1	2	1
1	2	2	1
1	6	1	2
6	1	2	1
13	4	2	1
2	3	8	3
1	5	5	2
2	5	1	3
1	4	1	1
1	1		2
1	2		1
1	4		1
3	1		3
1	3		2
2	4		3
3	4		1
2	1		1
1	1		10
1	6		6
1	2		4
3	1		6
3	1		1
1	2		2
1	1		6
6	1		1
13	3		1
2	1		3
1	3		1
2	1		1
1	2		1
1	6		10
1	1		6
1	4		4
1	3		6
2	5		1
3	5		2
3	4		6
3	1		1
5	2		1
11	4		3
1	1		1
5	3		1
4	4		1
3	4		6
1	1		4
8	1		5
3	6		1
1	2		1
1	1		5
5	1		1
3	14		1
1	3		2
1	4		2
1	2		1
2	1		1
1	2		3
2	1		1
3	3		1
3	1		6
3	1		4
5	3		5
11	5		1
1	1		1
5	9		5
4	2		1
3	1		1
1	5		2
8	3		2
3	3		1
1	2		1
1	1		3
5	4		1
3	1		6
1	1		1
1	4		10
1	3		5
2	2		2
2	1		4
1	14		1
1	3		1
3	4		1
2	2		1
1	1		1
1	2		5
1	1		2
2	3		1
3	1		6
3	1		1
5	3		10
1	5		5
1	1		2
7	9		4
2	2		1
6	1		1
1	5		1
1	3		1
1	3		1
7	2		5
3	1		2
3	4		8
4	1		4
4	1		1
2	4		2
1	3		6
2	2		6
1	4		4
1	2		5
3	2		3
2	1		3
1	8		1
1	1		3
1	5		5
2	5		1
3	1		4
3	7		3
5	3		1
1	4		2
1	3		1
7	1		10
2	7		8
6	4		4
1	4		1
1	2		2
1	2		6
7	1		6
3	8		4
3	1		5
4	5		3
4	5		3
2	1		1
1	7		3
2	3		5
2	4		1
6	3		4
3	1		3
2	7		1
1	4		2
7	1		1
1	4		10
1	5		1
1	4		3
1	5		1
1	2		1
2	7		3
2	2		1
6	3		1
3	4		5
2	5		2
1	5		1
7	3		4
1	1		1
1	8		5
1	2		2
1	4		1
1	4		4
4	1		4
2	1		8
10	4		2
7	5		2
1	4		2
2	5		7
4	2		7
2	7		2
10	2		6
7	3		4
1	4		4
2	5		3
4	5		1
4	3		3
11	1		1
4	8		5
2	2		1
4	4		5
4	4		7
11	1		1
4	1		1
2	4		4
2	6		4
1	2		8
3	2		2
1	3		2
5	8		2
6	4		7
2	6		7
3	7		2
1	7		6
7	2		4
1	3		4
2	7		3
1	1		1
3	1		3
1	1		1
5	2		5
6	6		1
2	2		5
3	1		7
1	2		1
7	4		1
1	1		4
1	3		8
3	4		1
1	4		1
4	1		1
2	4		1
9	6		6
1	2		5
1	2		2
7	3		3
1	8		5
2	4		1
2	6		2
2	7		1
1	7		8
1	2		1
1	3		1
7	7		1
1	1		1
3	1		6
6	1		5
2	2		2
1	6		3
3	2		5
1	1		1
4	2		2
2	4		1
9	1		1
1	3		4
1	4		1
7	4		4
1	3		10
2	2		1
2	1		4
2	4		1
1	1		3
1	1		3
1	3		6
7	2		6
1	1		2
3	2		4
6	3		1
2	2		13
2	1		1
1	1		7
2	1		35
7	2		8
7	4		1
4	3		4
1	7		2
1	1		10
1	3		1
2	2		4
5	1		1
3	4		3
4	1		3
2	1		6
1	3		6
5	2		2
2	1		4
2	2		1
6	3		13
3	2		1
2	1		7
4	1		35
1	1		8
5	2		1
1	4		4
2	3		2
2	7		1
1	1		3
2	5		3
7	2		2
7	1		3
4	1		10
1	3		4
1	6		2
1	4		4
2	3		5
5	3		3
3	1		1
4	6		3
2	6		3
1	8		2
5	9		3
2	4		10
2	8		4
6	5		2
3	8		4
2	8		5
4	7		3
1	3		3
5	1		3
1	3
2	3
2	5
1	2
1	5
3	2
2	1
2	1
1	3
1	6
2	4
3	3
1	3
6	1
8	6
1	6
1	8
7	9
5	4
3	8
3	5
1	8
6	8
2	7
1	3
7	1
1	3
1	3
5	5
4	2
13	1
2	1
3	2
2	2
1	1
1	2
3	2
2	4
2	7
1	2
1	3
2	2
3	5
1	2
6	1
8	1
1	2
1	2
7	1
5	2
3	2
3	4
1	7
6	2
2	3
1	2
7	5
1	2
1	1
5	2
4	2
13	1
2	7
3	2
1	2
1	5
4	7
1	6
1	5
3	1
4	5
1	3
1	4
8	5
5	2
6	1
3	2
4	2
7	1
4	7
3	2
5	2
4	5
2	7
1	6
9	5
1	1
7	5
7	3
9	4
1	5
1	2
1	1
6	1
6	4
6	1
8	4
1	4
1	7
4	4
1	1
1	4
3	4
4	7
1	3
1	2
8	4
5	9
6	3
3	1
4	3
7	3
4	3
3	3
5	5
4	2
2	3
1	2
9	4
1	9
7	3
7	1
9	3
1	3
1	3
1	3
6	5
6	2
6	1
8	3
2	6
6	4
1	1
7	2
2	3
4	2
3	4
6	6
5	1
2	7
6	7
1	6
3	1
4	3
2	1
6	3
1	6
7	4
2	1
4	2
3	3
6	2
5	4
2	6
6	1
1	7
3	7
4	6
1	1
1	3
1	5
3	2
6	8
5	3
1	4
3	2
4	3
2	7
4	3
4	2
6	1
3	6
1	2
5	1
1	4
1	1
1	5
5	10
2	2
2	5
1	2
21	8
5	3
1	4
5	2
6	3
3	7
2	3
3	2
5	1
12	6
2	2
1	1
3	4
3	1
3	5
5	10
1	2
1	1
1	3
1	5
1	1
1	1
3	1
6	1
5	4
1	1
3	3
4	5
2	1
4	1
4	1
6	1
3	4
1	3
5	1
1	2
1	1
1	6
5	3
2	3
2	1
1	2
21	1
5	6
1	3
5	6
6	2
3	6
2	1
3	6
5	3
12	4
2	4
1	1
3	6
3	2
3	6
5	1
1	6
1	3
1	4
2	4
2	1
7	1
2	1
2	7
2	4
1	1
2	3
4	1
4	4
5	2
6	3
4	1
6	1
4	7
1	4
1	1
1	3
3	1
3	4
2	2
2	3
7	1
2	5
2	5
2	3
1	1
2	4
4	1
4	5
5	5
6	3
4	1
6	4
4	4
1	5
1	2
1	6
3	4
3	5
2	2
2	6
2	2
4	2
1	2
5	2
3
2
2
3
2
1
2
1
1
1
6
2
2
2
4
1
5
3
2
2
3
2
1
2
1
1
1
6
4
2
2
4
5
4
2
2
4
5

## Sheet: Fig.1f
%	DMSO	BMH21	THZ1	ML-60218			Number of families	1
Exp1	96.3415	74.2424	96.1538	94.7368			Number of comparisons per family	3
Exp2	87.5	59.0164	85.9649	94.7368			Alpha	0.05
Exp3	97.2973	66.6667	98.2456	89.6552
							Dunnett's multiple comparisons test	Mean Diff,	95,00% CI of diff,	Below threshold?	Summary	Adjusted P Value
							DMSO vs. BMH21	27.07	13,21 to 40,93	Yes	**	0.0013
							DMSO vs. THZ1	0.2581	-13,60 to 14,11	No	ns	>0,9999
							DMSO vs. ML-60218	0.67	-13,19 to 14,53	No	ns	0.9979

## Sheet: Fig.1h
%	DMSO	BMH21	THZ1	ML-60218		Number of families	1
Exp1	19.1781	19.697	12.963	16.129		Number of comparisons per family	3
Exp2	20.2899	19.0476	15.2542	21.6667		Alpha	0.05
Exp3	24.1935	18.5185	12.2807	19.6078
						Dunnett's multiple comparisons test	Mean Diff,	95,00% CI of diff,	Below threshold?	Summary	Adjusted P Value
						DMSO vs. BMH21	2.133	-2,792 to 7,058	No	ns	0.4944
						DMSO vs. THZ1	7.721	2,796 to 12,65	Yes	**	0.005
						DMSO vs. ML-60218	2.086	-2,839 to 7,011	No	ns	0.5101

## Sheet: Fig.2c
empty DMSO	empty THZ1	sgRNA DMSO	sgRNA THZ1
35.9238	12.8707	27.4389	14.3219
24.6632	20.6369	25.6679	28.8607
26.16	12.0332	16.0723	16.2218
23.8348	14.0301	23.8942	15.0426
27.683	90.1229	21.271	14.8977
22.6678	18.2718	17.4338	19.2281
18.9616	15.0043	32.3861	17.4704
24.5649	14.7466	17.1863	15.0884
24.7554	15.8403	32.1414	16.9667
22.9392	15.5961	17.6291	20.8264
34.3406	12.0433	21.9248	28.5634
21.6951	19.5106	19.1502	18.0163									Number of families	1
22.8576	14.3489	18.3645	19.9891									Number of comparisons per family	6
21.215	15.0809	26.0876	28.4391									Alpha	0.05
24.8105	13.6938	21.2499	14.0982
23.2248	14.4049	18.2603	63.5048									Tukey's multiple comparisons test	Mean Diff,	95,00% CI of diff,	Below threshold?	Summary	Adjusted P Value
29.4013	15.2029	16.6641	18.06									empty DMSO vs. empty THZ1	15.47	14,06 to 16,88	Yes	****	<0,0001	A-B
26.7913	16.7166	24.3728	15.5351									empty DMSO vs. sgRNA DMSO	-1.817	-3,294 to -0,3404	Yes	**	0.0086	A-C
31.573	13.761	23.0419	21.4876									empty DMSO vs. sgRNA THZ1	13.83	12,40 to 15,26	Yes	****	<0,0001	A-D
25.5149	13.7115	24.3221	30.2018									empty THZ1 vs. sgRNA DMSO	-17.28	-18,73 to -15,84	Yes	****	<0,0001	B-C
45.8563	13.3894	16.9284	15.8713									empty THZ1 vs. sgRNA THZ1	-1.637	-3,032 to -0,2418	Yes	*	0.0137	B-D
24.5352	18.9685	27.6953	18.7007									sgRNA DMSO vs. sgRNA THZ1	15.65	14,18 to 17,11	Yes	****	<0,0001	C-D
26.3481	15.7116	25.8193	19.9167
26.3606	16.1989	22.0766	17.2716									Test details	Mean 1	Mean 2	Mean Diff,	SE of diff,	n1	n2	q	DF
33.4635	18.5859	22.0637	19.1608									empty DMSO vs. empty THZ1	42.29	26.82	15.47	0.5486	5710	6283	39.87	23142
38.7094	98.392	27.5677	15.4008									empty DMSO vs. sgRNA DMSO	42.29	44.11	-1.817	0.5748	5710	5210	4.471	23142
35.6545	13.987	23.7258	28.7966									empty DMSO vs. sgRNA THZ1	42.29	28.46	13.83	0.556	5710	5943	35.18	23142
25.0182	15.5696	19.8706	19.6									empty THZ1 vs. sgRNA DMSO	26.82	44.11	-17.28	0.5622	6283	5210	43.48	23142
23.7999	14.4214	29.7611	30.258									empty THZ1 vs. sgRNA THZ1	26.82	28.46	-1.637	0.5429	6283	5943	4.263	23142
36.5538	55.882	21.0871	16.4204									sgRNA DMSO vs. sgRNA THZ1	44.11	28.46	15.65	0.5694	5210	5943	38.86	23142
93.4691	18.7757	25.4341	18.2643
33.5225	13.5706	23.673	13.6991
49.5331	16.3177	18.2854	16.0637
33.5225	17.5893	25.9566	15.1885
24.6838	19.628	28.1823	15.9951
57.6044	19.2004	28.3806	15.2456
24.6625	18.6514	27.872	28.4507
26.415	18.244	27.7384	21.1624
62.0455	16.7035	27.82	19.3169
30.1966	15.9289	37.3089	53.6192
32.0749	15.8693	24.3841	26.3533
28.1254	22.5789	24.4612	17.7817
34.6641	14.8887	30.0278	28.6823
27.5336	15.7653	42.4877	18.889
29.6525	19.4056	58.3527	25.6295
29.3724	19.5239	26.0213	37.3213
25.0406	27.5907	79.8809	22.1553
32.0103	18.2291	69.0395	17.2416
131.311	26.77	29.2735	22.6887
44.5853	40.2025	35.0902	28.2628
26.6508	31.2737	36.9495	28.3113
31.8885	15.9375	30.0282	37.7089
29.6283	16.3954	45.9598	16.841
31.4303	19.7509	32.0432	27.3189
35.6437	17.5505	31.4133	15.3709
30.4629	17.4462	32.6536	16.1456
27.0037	18.9479	31.1478	34.3402
36.9463	21.3966	41.0351	36.5219
27.2046	16.8808	27.9863	30.6921
37.5232	15.9454	25.2255	26.2273
37.6009	18.7157	37.2866	14.3371
26.7133	34.4557	26.6953	21.7656
52.6636	18.1296	32.4427	28.112
37.9614	19.9048	38.8775	15.9633
25.8726	21.5761	30.1261	38.1569
31.9032	31.3659	26.6916	23.5812
25.5297	15.1676	36.6127	15.7241
27.6658	19.4954	98.2826	23.8745
43.1068	20.8896	42.9499	35.906
39.1544	22.722	75.2896	22.8904
33.5791	19.5121	29.8245	27.774
36.1448	30.5767	32.3805	18.7945
37.2758	20.2533	30.5176	57.4594
28.093	32.9159	80.7361	21.5358
24.8655	14.6585	32.6016	32.1892
25.9412	18.7192	32.7371	26.1111
42.8196	17.4264	32.8644	21.4911
24.4886	21.1036	29.6886	20.5454
28.0983	21.0893	31.2648	22.9642
27.225	17.4218	21.9574	23.0898
31.0659	23.5985	121.896	21.448
25.8658	294.645	44.8659	23.7473
26.3082	21.1033	27.4977	37.0971
44.3557	45.3447	63.5991	23.7053
38.8443	18.6942	44.382	19.9318
37.8311	33.7334	29.6486	21.7323
42.4903	23.7576	37.5854	22.9579
33.5131	17.1954	29.7183	21.2469
27.5045	35.9237	47.2709	29.8357
30.7327	15.6438	32.2187	21.2538
28.7622	18.1042	26.3267	29.6141
42.1042	17.2586	25.7382	17.5495
62.7831	16.4207	18.5411	24.7735
43.8527	17.4594	30.3304	26.9098
34.3541	21.9307	22.7977	25.6079
38.3853	18.1285	17.3754	24.6442
38.1893	17.0499	24.756	19.0037
41.7414	18.2449	33.776	18.9306
54.3821	19.5219	17.6375	28.3401
26.7562	21.344	19.756	20.2093
57.9056	16.9716	19.5337	29.7429
43.4938	22.9267	21.7578	22.6147
39.1383	16.5498	22.5188	22.0094
31.1691	23.4847	20.0694	23.2907
34.8208	26.2387	20.2365	17.4107
42.7877	42.3081	20.4898	19.8035
75.8167	19.0157	21.2199	38.6382
29.2425	26.6434	20.9303	22.0714
62.0351	15.9197	45.9666	27.5414
52.392	20.5798	34.7161	19.1192
34.5261	20.8978	23.4388	21.9545
48.5088	25.7176	20.1792	20.4359
40.6416	20.5745	20.7142	27.4906
39.1876	25.968	21.5864	21.8175
37.3137	25.8221	20.7136	21.9313
34.6704	24.2792	22.9958	22.9332
32.3272	17.4724	38.2556	19.8823
28.1073	28.3234	24.6127	22.0197
26.146	23.4014	49.8392	26.3984
55.4452	21.0901	26.2423	20.7199
44.2474	19.4765	20.1304	22.0573
21.6086	36.952	19.2597	21.3248
22.9469	18.4622	24.0428	30.7567
25.0386	21.1799	16.4226	22.9362
29.0365	20.208	22.4311	18.9305
21.8257	64.9232	27.208	22.5721
39.4809	26.3103	34.7413	26.455
23.5944	17.417	22.4906	26.8149
28.7201	24.4194	26.7703	23.9354
60.7037	34.8345	16.1584	25.1032
25.7703	16.0484	29.0097	22.4365
31.7664	12.4519	34.1629	22.4692
27.5598	22.2808	32.0832	21.6977
37.7516	18.3689	21.2456	23.2277
35.0898	12.5619	20.4639	28.7781
24.8175	11.4185	27.0381	16.0856
39.2638	16.3803	27.0812	15.9678
22.9639	16.4133	27.3751	11.6191
49.1762	15.7242	30.3292	15.5877
29.4553	17.6733	21.8035	12.3337
33.5247	12.9158	22.0611	14.6038
18.7324	15.9543	23.6693	21.7844
41.0577	11.6726	25.7894	13.6748
28.8196	12.6365	26.0416	16.1071
23.7557	17.5802	23.0057	13.6703
32.5043	56.8322	38.6562	15.4043
35.6217	13.2998	27.1533	22.2471
28.4691	22.2618	24.8856	13.6233
25.714	11.8162	29.5184	12.6772
28.5109	13.5095	20.4409	12.7892
51.8717	13.9924	30.4242	12.9265
53.0911	70.7563	21.6752	17.0968
26.6376	13.8348	30.8326	15.4553
30.8606	25.0222	19.8425	14.7556
26.1351	17.5048	26.6039	14.0623
27.1457	16.0754	63.6568	16.5459
20.9675	21.5596	27.9759	22.2282
45.5204	14.8697	250.644	59.3413
26.2608	15.0478	19.9846	17.5502
26.2653	15.874	114.306	15.8343
32.2296	17.7896	25.4983	17.0622
35.4348	16.2824	713.726	21.8186
29.131	21.2775	40.6762	13.7579
106.676	17.3323	30.0645	19.0167
29.4523	21.522	22.3805	30.6604
38.8018	16.4199	32.1645	16.8352
23.1432	18.6548	33.4914	13.8642
34.071	14.3522	22.1277	25.8325
37.3658	18.1804	26.5515	16.0046
24.3386	30.8771	32.4187	13.9387
26.2637	16.856	19.1743	20.0796
41.078	25.356	85.8977	13.9045
38.152	15.2281	20.0799	134.66
92.0041	25.0173	48.4439	16.3943
30.2019	151.075	28.1169	16.6771
37.4208	23.0205	21.8269	48.2656
34.3897	22.0366	32.2982	19.9652
33.5653	29.2197	33.015	19.9604
32.6209	19.4262	31.2371	16.6219
29.9758	16.9913	24.5517	28.4924
31.0587	21.8767	22.3527	18.1439
26.8138	21.7628	23.1784	13.877
36.3085	22.9853	24.599	16.2003
32.9107	20.3604	23.7217	20.0431
26.3435	14.2647	23.0991	15.2371
35.4203	19.1103	23.0096	14.553
33.9707	182.264	14.0651	26.7743
36.6777	14.7911	32.5478	15.2879
35.2651	14.3897	13.3318	13.2234
36.5961	12.8426	43.241	16.7541
35.5771	12.5497	24.7198	13.525
36.0754	13.0197	17.6959	18.815
48.3438	12.5706	17.9484	17.9509
44.7231	40.2471	19.2797	13.4215
27.5063	14.6205	19.0396	15.4211
30.4746	11.1046	25.6572	13.9813
26.4499	13.4725	46.4094	48.9973
35.8692	14.3145	19.3089	15.8008
37.5747	14.4046	19.3043	16.5136
32.2575	20.8472	15.8655	14.2955
36.4644	12.6033	25.1438	13.3054
22.8645	17.4998	33.4695	17.3337
39.0561	15.5434	26.5818	16.6091
48.9403	14.9183	27.738	26.4757
58.6234	13.8706	17.5337	15.7508
39.3552	26.7218	38.2445	11.807
31.2991	16.7767	17.9499	13.9953
179.246	14.7389	34.5525	16.1974
39.3742	12.8657	21.754	16.6686
33.5442	21.8525	27.9949	14.1077
39.0002	18.6696	28.4492	13.3189
211.041	16.8384	30.4045	16.5793
32.4132	14.0918	23.6599	16.2616
25.3441	34.8673	37.9267	15.2059
30.1489	18.4738	26.4402	16.8954
35.5603	44.8299	28.3881	16.4904
34.4931	17.2132	31.1701	12.9496
37.6093	17.4593	46.4422	80.1997
38.5086	14.0507	35.8734	17.9612
38.5637	13.5426	34.799	19.5133
34.9836	12.5637	39.794	20.7402
207.702	18.3456	37.1077	14.8765
30.4231	35.4875	46.7131	20.4399
66.3883	16.5825	32.5111	25.8967
33.1466	20.0435	40.684	19.7579
26.337	15.4157	51.1478	18.736
26.6609	17.8896	35.6221	16.4118
29.1574	15.6128	37.2211	14.5038
45.3261	96.8811	32.7368	24.2053
34.8739	14.2904	33.2348	24.6615
27.6466	20.3234	36.6006	16.8822
46.883	20.0095	35.7004	15.6726
29.8455	12.992	30.8101	15.0343
24.6353	18.5987	35.7929	24.7699
18.2673	18.922	37.622	20.6883
21.7557	30.4748	37.0622	23.1583
22.5198	16.513	58.9511	20.4229
23.3398	19.3531	36.7501	23.7535
25.3867	21.0846	33.8745	22.1872
286.002	17.4922	31.3315	15.2823
23.4511	18.9922	33.6257	32.843
31.1058	18.7792	34.2298	24.3498
21.4913	14.9139	36.8826	23.8187
32.2315	35.7161	35.4759	15.1944
29.2736	19.9077	29.9238	15.8196
28.3438	14.8285	46.0074	24.445
29.2185	16.016	32.4141	19.0549
20.25	20.6587	28.5631	17.909
28.3327	19.582	33.8321	15.7787
36.1851	17.135	36.6417	19.7935
29.6741	15.4043	30.5919	15.3166
27.4131	16.4979	31.5906	13.1801
25.4387	21.4795	54.9839	18.4742
26.3582	23.5691	46.4678	15.9932
26.4754	20.211	41.7562	12.6787
25.0985	16.4955	51.6318	12.1478
26.3937	16.6109	37.5538	12.9427
41.8875	33.6433	40.3691	11.6634
35.9107	27.9271	32.5591	11.7599
25.5123	20.4042	31.9534	17.3787
29.4583	21.5816	84.6074	14.5773
23.406	24.8776	30.2123	16.1984
38.5365	25.0677	33.579	15.0966
22.3617	21.4027	37.2103	18.8811
45.919	23.6114	39.643	15.3846
86.7719	21.1465	71.7561	18.8152
58.6587	21.3228	49.5069	14.9471
31.8658	19.5989	37.9901	15.2728
32.9575	22.0988	31.0407	17.599
32.3492	28.9775	38.9206	41.368
21.0372	26.0519	35.467	17.2508
36.3899	23.8065	28.5555	18.2629
27.116	20.5385	34.7143	15.0928
44.3523	19.2986	34.0919	21.9138
53.3968	25.0871	55.1996	17.837
34.4593	22.5323	37.1749	17.3268
26.7902	251.597	44.0471	16.9681
28.4032	18.9762	66.1004	19.7047
39.6495	24.5621	33.993	65.724
31.4366	21.6432	41.705	37.9182
32.2082	19.0865	49.5789	66.9792
32.8388	21.0947	41.4854	20.1628
35.3354	55.3265	46.7755	23.6332
33.0646	21.048	61.5189	16.9276
46.0722	17.723	31.3171	18.7976
25.7217	24.9493	41.6711	18.2754
34.8332	23.0923	49.004	32.3376
29.4613	44.9455	79.6956	22.1344
31.9561	18.767	49.0927	22.7459
28.6762	38.51	65.1435	22.5359
28.8635	19.3474	44.5676	16.9796
28.423	51.6445	20.1138	16.5446
36.0911	23.3301	20.5268	17.5116
28.4666	16.5032	21.3312	22.4417
28.2383	16.6229	19.6446	22.584
27.4759	18.8796	29.6131	28.512
36.7557	23.5399	29.8119	21.9899
27.0975	23.9582	25.8817	19.309
62.0949	21.9519	24.9848	17.8276
37.7428	29.6827	30.9138	25.6549
33.8718	18.1485	30.196	18.6574
59.7156	20.1621	42.5621	196.356
43.0553	24.5236	33.775	21.4626
41.5828	29.0792	25.1794	23.2829
36.4383	20.9599	28.9285	21.9649
43.3324	33.0254	22.1519	21.6385
37.855	23.2574	32.4128	22.8991
66.8937	22.0485	26.562	20.3769
64.0987	26.1741	32.2292	18.6491
49.8055	15.5399	31.6537	29.1411
33.1106	13.9306	27.5092	22.3313
39.3081	28.2709	34.0124	18.9746
25.5746	13.1001	26.2793	22.245
42.6715	15.2519	24.7815	20.9611
35.3483	16.4241	27.2631	21.3145
33.4015	14.4508	31.5496	21.6109
41.6282	17.0859	25.5378	39.129
269.795	15.4677	29.9624	21.0049
206.644	17.9184	25.778	24.892
72.681	13.8632	32.2428	21.1456
44.4933	14.0177	39.1263	27.2629
45.4957	15.5706	35.5897	20.5827
26.4486	14.6848	34.3758	23.2113
20.463	23.1708	30.3247	22.6977
20.3505	17.2768	31.1885	140.151
27.5706	18.2889	22.7924	17.8654
22.6828	17.1462	31.8251	25.2185
30.3285	17.33	33.8858	25.6792
19.7348	78.4873	41.7696	18.4692
27.9944	13.0592	36.5783	22.9347
20.0448	21.5014	31.9236	27.4272
25.5697	32.2789	36.8117	18.5318
34.4021	14.6355	38.7145	20.7538
31.1213	17.038	22.526	20.2509
27.1492	19.0491	35.6606	18.015
23.7491	15.8489	32.1452	20.6919
31.9696	91.4548	32.2075	25.6073
33.9584	14.1562	37.2344	24.2114
29.3595	22.4085	22.3662	20.9623
24.6039	19.4863	30.9108	17.9449
22.1085	21.9957	46.1534	16.779
28.8031	18.5633	39.4123	23.9547
29.2073	15.8677	41.4443	21.9034
27.4361	15.1323	57.9402	20.9397
63.4656	24.193	38.4088	66.7739
32.0905	15.5094	39.7412	27.088
53.5386	24.8792	34.2461	23.1842
34.8531	16.5406	30.7923	14.6846
28.7557	19.9978	33.5767	12.8525
31.7451	18.6573	41.1002	15.7444
34.408	16.6251	64.9872	15.1754
31.8951	17.2111	31.3818	15.6452
24.2898	16.2668	42.3861	14.291
36.2777	17.1906	26.6784	18.4731
44.5108	15.9336	55.5678	15.5629
41.914	15.1287	41.2117	34.4587
32.9411	15.8624	37.5469	14.34
417.011	18.4949	31.7546	17.5852
33.8215	16.817	43.217	19.7956
36.9735	16.1737	53.0749	17.3267
28.7045	18.3789	34.6912	21.3265
23.8801	17.6991	45.8572	15.1003
31.856	14.9143	33.2185	18.494
31.2313	18.3894	31.2832	15.0405
26.3107	14.6521	40.5624	17.1671
34.1825	16.2389	37.3682	27.183
40.2887	20.3411	36.8295	21.0818
41.3832	20.7723	43.3771	18.0856
27.406	19.6861	36.9447	18.0507
41.2407	19.302	30.1332	16.9833
28.5806	17.5227	44.1993	21.74
28.4776	16.176	38.4572	67.1646
31.7449	19.5264	40.4433	32.733
39.4047	17.5257	40.4432	16.4625
38.7816	29.0136	45.6478	19.0763
38.7138	24.4491	53.5044	21.9803
39.054	19.2503	66.8178	23.1292
46.5215	16.1461	47.5587	18.9226
34.8728	16.6978	44.4938	24.3754
24.3446	18.1907	56.8736	23.8568
38.0305	19.1331	36.2677	22.9144
39.9001	18.711	56.7479	226.566
56.848	17.0902	40.7053	18.7825
45.2394	16.7968	57.5765	28.5406
62.1283	19.2522	30.2991	16.7839
33.7885	20.2242	81.2739	18.963
30.6818	18.1548	52.0837	26.2432
51.4469	20.3061	54.3167	20.2704
80.396	40.3194	41.9968	19.3703
41.1958	16.2542	29.2664	282.104
37.502	20.7936	34.1775	27.2653
29.1646	20.758	45.026	21.1786
35.6828	17.7706	40.9356	15.4911
30.7219	18.4796	40.109	22.7844
31.8374	18.1218	37.9802	18.107
40.2585	38.9772	25.421	19.0712
33.0932	20.2843	32.3565	19.143
61.6113	18.5473	33.1751	19.7681
31.1757	26.721	34.6624	20.379
34.046	19.483	23.9905	16.5038
36.1819	18.787	26.2234	21.2828
49.7512	21.9057	24.0303	20.1036
28.1791	17.3483	22.9783	20.2152
63.3097	19.118	23.6818	19.9642
41.1307	21.9488	25.6584	24.5511
30.8404	21.5881	23.1604	21.6927
32.6284	24.1813	20.2806	23.7386
38.165	28.8925	28.1133	19.5029
26.7702	18.851	27.8083	22.6899
35.3826	16.8816	25.0705	25.1941
26.3816	77.4399	34.9992	24.3355
26.3036	20.4358	27.3455	24.0069
49.3042	19.4334	27.7517	21.6926
35.6997	39.9679	22.7344	21.1136
48.2616	26.8347	23.0226	19.8663
44.4085	20.2405	29.7618	32.9998
30.5625	17.7618	25.5501	29.9722
37.7361	22.0068	28.28	26.0818
33.0991	21.5489	33.0257	20.0531
40.9199	28.811	28.6113	25.7018
28.1492	27.3876	33.4515	16.4359
40.1704	18.46	24.8982	19.4272
26.4096	22.4282	25.1242	25.8265
16.2653	16.8982	23.8466	35.5949
26.9538	26.7622	19.8188	30.8926
24.1404	23.2978	27.987	21.1843
35.0479	20.9094	36.1087	27.8571
31.917	27.6575	36.1702	19.0182
34.4885	21.8386	24.9238	25.207
33.7984	16.207	25.8291	27.6343
32.8777	23.9862	34.2327	24.0133
68.4496	123.947	30.6786	20.9415
19.1996	24.437	26.0275	20.931
20.4335	19.8885	24.3477	25.3577
21.4647	19.929	25.8258	48.6756
21.1379	23.3373	32.7284	19.3207
18.0778	150.439	44.8304	21.5658
19.4976	17.8026	35.1882	23.7888
17.9111	20.1091	30.6091	26.7194
23.848	14.3646	238.5	20.4652
20.4929	20.8626	45.6591	20.8801
31.6732	13.5822	32.5819	24.8013
24.8867	16.9158	42.7812	19.9004
24.8964	24.636	59.7046	36.0155
32.1341	34.5459	41.2579	36.8446
19.825	25.0428	158.191	29.5919
26.7363	16.0452	29.4353	27.4143
20.1396	16.6335	38.0179	58.9275
21.847	14.6279	52.4486	21.3415
19.9104	14.7408	41.4053	59.4339
25.5639	16.3944	39.0607	48.2586
24.6027	16.8348	40.2833	97.681
26.9132	17.3082	43.1249	19.4187
26.5846	14.0746	38.3039	19.2432
23.1851	27.3167	32.7952	21.5808
27.4256	15.7897	29.4206	29.2481
28.679	21.6064	71.7223	87.1028
21.1938	29.6877	44.173	28.92
33.0417	19.4955	90.1332	28.1691
20.5744	16.3389	34.4098	24.7935
32.6054	17.3452	32.804	26.0854
26.831	15.1649	44.9817	27.1573
24.6944	18.1927	46.6699	30.3779
32.7025	20.9818	37.5232	36.2775
28.206	20.7598	68.6903	29.1628
31.2606	17.3747	69.9386	46.7081
27.9809	16.6354	30.4981	23.7382
28.2162	21.1005	41.0932	28.7286
145.664	39.1157	38.4917	19.2985
37.6309	17.8034	43.9814	29.1517
24.6644	23.4733	40.7981	20.4926
28.0083	34.4936	32.5599	30.9705
23.4576	21.9255	49.0709	29.311
21.9161	26.5778	43.994	20.1132
32.3659	18.4185	43.4901	18.9322
35.1168	30.0316	37.8382	20.0854
27.157	23.2248	31.5623	23.2818
22.9711	26.2453	38.9557	17.365
36.9289	19.7082	39.1787	19.9348
37.3009	26.6982	33.7667	17.9636
23.9886	25.7947	49.0645	58.436
31.143	18.5174	41.7667	24.563
28.8183	18.5596	37.7663	15.7771
30.937	19.4644	39.105	17.8176
28.413	27.215	39.4281	26.5448
30.5526	15.6383	31.3088	15.5471
26.2251	21.6639	29.6676	18.1834
28.9252	28.0398	38.8638	14.3104
31.92	19.0196	32.0137	15.2065
29.9112	29.2502	42.303	14.4966
43.5876	20.2011	36.1422	17.0662
40.1999	24.023	40.7498	15.5351
27.9991	20.9954	42.1389	17.891
30.2622	28.1786	42.4456	15.6954
31.3719	47.6614	34.7832	19.0407
28.7967	22.1187	43.7684	47.4425
24.0583	26.6532	38.2933	16.1571
26.6059	20.3937	56.7198	15.5135
97.5121	20.9485	31.2402	18.6292
30.862	16.6154	30.1866	16.9377
50.1161	24.5734	40.6957	17.532
25.6049	33.8694	31.6041	35.1867
31.5499	26.1731	44.1868	17.7153
27.9392	23.994	43.8422	37.1971
37.7233	21.6923	39.0694	17.8664
33.3674	21.1669	47.8584	20.5053
31.5328	39.5822	27.9198	18.8302
32.7109	18.5287	45.7471	19.6393
29.764	25.9901	33.2505	70.9145
52.9945	31.1637	38.5901	19.5604
22.8991	20.6014	30.6605	18.7511
40.8136	22.7759	40.0961	19.6967
30.5533	26.6721	34.9949	18.7287
102.951	28.1793	39.4925	18.6764
34.8973	21.6535	41.6122	20.4319
22.8244	32.7516	37.5393	18.8575
27.5505	22.6577	30.8359	26.4414
51.21	16.1934	42.453	22.2654
212.29	29.1016	41.1183	18.0742
34.2321	23.7595	41.3353	20.4564
239.664	24.3597	32.3969	43.7274
38.8536	17.1834	41.9033	20.156
32.548	22.4579	38.4349	24.3189
45.8287	26.7211	67.5572	21.5157
32.3037	28.9101	34.4749	34.8266
55.6299	16.7024	32.8056	37.4547
30.9206	27.6273	36.8125	21.5293
244.881	17.6714	30.6326	20.4902
34.6883	23.9958	38.5044	24.6886
30.875	27.359	26.0985	29.8297
72.5799	29.6511	38.6	33.0795
33.7989	26.6697	26.4257	34.854
71.8451	19.6326	37.3696	30.2917
42.0467	22.8582	39.6332	32.2639
42.9847	24.7346	34.4189	26.2538
38.1367	16.426	29.7032	20.0003
39.9536	26.2564	34.6865	27.8553
53.9931	22.9448	30.2197	27.4488
40.411	29.3142	33.3608	24.2448
58.4784	65.658	42.8882	70.4736
56.6619	16.073	30.0084	41.6482
37.0303	26.2949	22.0076	22.9052
24.6401	30.2827	23.5455	37.4723
40.0925	25.2839	29.4453	23.1121
25.904	149.058	20.6439	24.5481
68.3691	27.9636	24.5467	27.7292
30.8267	35.3687	26.8085	21.9844
43.7013	34.593	35.7795	25.1978
42.768	19.4256	37.9558	24.0848
54.9311	18.392	29.3215	26.4854
46.6239	174.906	31.4922	20.2467
27.7687	24.4877	27.3018	48.7543
25.4797	34.5008	30.3426	18.325
22.3022	21.4312	24.0106	24.4679
20.8727	19.6277	39.0709	21.0611
30.2956	19.7858	39.9531	19.0723
24.5981	28.6184	31.0676	40.1885
25.4109	23.766	29.3924	16.9763
24.1518	21.5297	46.3693	42.0538
24.0901	15.9309	37.867	21.1532
21.7403	13.0431	23.7303	20.7224
18.9438	14.5239	31.6606	18.7984
27.4403	20.1564	35.3059	34.2969
24.8931	15.4998	25.5585	23.4968
21.2706	14.7481	29.8511	20.8081
26.6712	20.1221	32.9747	22.3117
29.8371	14.5671	31.3578	22.3404
22.9236	14.5632	26.7022	21.5078
21.4569	22.8025	55.8546	52.0616
25.5866	14.4749	30.3902	26.1525
28.348	15.0361	24.7924	19.6872
29.5202	20.3352	31.4441	21.0691
27.0733	20.2031	72.9813	23.4584
90.1319	15.2435	35.8756	20.0232
26.6295	16.2491	27.8158	19.5416
29.939	13.6677	33.2663	66.9536
20.8345	23.7456	23.7204	21.3726
26.7685	18.4005	40.6516	22.8963
36.8886	16.4318	70.3907	19.2524
29.4193	15.5156	34.7302	17.7434
22.3068	16.599	74.6317	28.6063
32.7126	16.8285	44.4287	17.5193
62.0503	23.0504	36.4436	19.3891
38.038	20.0914	39.8536	24.1415
28.9316	25.1775	33.2731	18.938
75.4318	28.2621	69.954	28.6345
29.3944	15.929	31.972	16.3859
37.8776	15.9344	20.3905	22.4319
43.7147	35.9207	44.5286	19.0629
45.7561	18.3336	36.6828	18.9056
32.0999	23.9692	36.9149	33.5531
32.4257	16.6469	36.5878	20.4259
27.6427	17.9772	44.3314	21.6252
40.5395	17.5611	36.6967	18.8008
34.3171	23.6213	42.0787	19.0815
25.4299	19.4871	46.0436	18.7667
32.8266	18.0733	41.0624	20.7478
26.9087	16.7658	45.3081	17.4943
60.7726	21.3486	35.9268	22.7382
47.0285	16.9515	148.922	17.88
39.6417	20.2625	35.6538	16.7704
28.6885	19.3409	126.183	18.5033
44.8969	21.5619	43.7393	20.6131
36.8244	17.3225	43.6981	17.6405
27.033	20.9257	33.4597	23.883
78.0507	18.7711	39.2758	15.6299
28.2501	16.2946	38.6684	27.8915
42.3309	23.8799	51.5553	26.644
34.6077	20.9007	43.3677	26.8443
38.2786	20.1146	34.0432	17.1801
37.2254	17.782	34.4949	25.3399
33.172	20.5257	42.6821	15.6443
28.8491	21.2827	30.6423	18.0414
37.1424	21.6637	45.3107	16.5267
47.0832	18.7394	42.6155	18.274
41.7184	21.1294	38.7144	30.218
36.4905	17.6333	27.8266	24.7113
29.1773	24.2504	38.4179	20.1435
42.0724	21.8299	38.4282	19.1311
40.0512	19.5478	37.6694	18.6428
33.8759	16.8649	49.2033	23.1446
25.3239	24.4476	39.4498	19.6339
40.6871	17.171	36.971	18.1879
44.1817	17.3133	33.0291	18.4264
28.7778	18.7752	59.3122	24.9146
48.4759	19.2602	35.1168	22.8607
34.7654	18.1179	41.0234	20.8983
77.6846	21.1191	38.2263	17.9828
35.569	19.4294	29.5913	26.9292
30.1492	17.0238	64.2264	43.6606
41.5806	19.5863	42.0985	21.2967
71.303	251.102	30.0185	19.5488
25.5743	66.7275	53.6985	16.3874
86.5141	24.0803	27.2413	19.4032
25.1298	20.3317	24.8007	22.3372
32.2202	43.2609	21.9256	30.648
38.2066	59.0405	35.5549	17.3277
45.6273	36.6823	21.2329	20.1342
35.4781	18.9408	23.2859	32.7621
34.8774	19.5294	27.412	18.8189
34.1748	19.8178	42.4038	33.0295
24.4723	22.0593	27.1233	20.0416
28.8596	19.2225	26.8985	30.2241
28.2927	16.932	35.883	20.5206
31.7894	155.243	25.8796	18.7962
31.0638	23.3317	61.4928	20.0711
40.3724	46.1376	83.5655	30.5398
33.8414	40.0865	91.0511	19.4735
31.2698	42.873	49.5773	19.2466
71.0391	20.2755	56.7437	28.1142
33.3214	16.4813	34.512	26.9544
24.7918	348.562	32.0156	18.7983
35.9676	19.4208	34.4468	21.4691
38.3637	22.3864	38.6827	17.0672
35.1522	24.0895	32.7899	47.436
21.0272	30.8886	100.036	18.8681
25.7961	22.4696	35.8751	24.9541
32.9279	23.9585	44.2245	17.8587
18.971	27.9431	135.42	25.9075
26.448	21.0022	38.0733	21.812
25.3195	24.8517	27.6499	27.413
27.0728	23.4047	37.56	44.2198
40.7962	23.8508	37.2682	39.5541
26.7047	34.5484	41.0322	262.171
24.6414	17.5953	37.9721	19.3973
16.1856	19.6539	31.64	20.896
28.3752	17.9864	43.0932	27.1407
31.4385	21.441	31.2957	18.5248
28.1832	17.7223	40.8912	40.5544
25.6048	22.5134	34.3272	45.9538
21.5758	23.8123	43.2238	29.8795
30.2752	24.1497	31.727	21.1955
23.5282	23.2728	37.2009	20.7794
23.3748	18.9565	53.7982	28.0087
22.7233	21.1158	31.6302	27.7158
26.28	16.5672	24.427	103.058
37.8062	18.3179	46.8971	33.6974
32.4063	18.9329	30.7337	49.6907
24.2506	18.8144	37.3248	18.8601
23.9467	24.2094	35.7845	21.5217
26.6826	30.3847	39.9931	17.3558
23.1525	17.7205	32.8424	26.915
29.9793	23.2517	52.7562	16.8102
38.1134	23.4957	36.2713	40.2064
31.774	64.353	40.7043	23.4647
27.8292	14.509	47.7449	29.6414
27.4806	13.7383	43.2786	28.8674
31.4539	12.1041	33.6128	21.8932
26.3111	18.4436	54.6025	21.1311
42.0939	23.4211	52.6863	21.3311
34.7365	14.8344	41.4671	31.9901
33.6305	15.6653	42.6839	21.9156
31.3498	12.9345	42.7037	35.5118
31.1445	13.9227	40.084	24.8238
29.2501	14.0076	42.8716	31.9868
38.6212	17.6969	396.544	20.0719
38.5448	119.457	68.2738	30.5706
39.9088	23.0966	39.7965	29.7873
30.3117	20.868	337.604	18.9782
39.0189	13.5079	60.6365	19.2632
42.5158	17.398	37.7542	17.5057
39.2596	15.5837	44.2056	22.9056
36.567	14.0056	35.1726	20.1931
35.265	20.2244	55.3633	22.5774
32.7569	17.4834	42.8999	21.3377
72.1269	15.5762	30.8897	19.5022
35.884	13.6603	50.9361	30.2716
31.9507	16.2728	52.7205	16.5903
41.3772	33.5945	32.7299	15.3022
43.159	16.2887	32.8464	28.2226
42.8117	13.5785	20.1402	15.9668
27.625	15.0584	17.8976	16.8009
130.305	13.8317	20.0971	22.3508
35.8705	13.7026	22.2389	23.6915
35.6725	18.7583	22.0847	23.1882
29.1461	14.9642	29.5833	17.4176
38.5453	26.7898	23.5653	19.3166
24.636	15.8604	31.1792	17.9535
25.5379	15.215	43.5734	62.9314
32.5724	13.9806	19.9607	32.8649
25.7197	16.5319	36.7172	16.709
35.1512	20.158	31.4315	17.3974
30.1969	16.7333	25.4895	31.3146
45.0236	19.3123	26.6913	39.8338
34.9674	16.6709	25.5036	17.8235
41.3164	15.6497	25.2873	19.0992
29.3507	24.573	32.3073	20.431
46.9994	17.012	39.7124	20.8718
19.2747	14.3583	34.1702	21.1712
28.766	15.3216	24.7509	72.8316
26.2248	18.249	23.5529	16.359
42.6277	16.2818	30.6181	18.2346
55.419	15.3192	34.1842	17.7155
46.9198	18.8889	37.4499	17.4897
45.2108	16.4593	36.16	23.719
31.8298	20.9767	40.9577	155.744
28.1642	16.6503	28.6951	26.7876
39.2376	18.1461	31.2417	26.645
28.517	19.3632	30.1799	16.1199
29.2714	16.8287	24.114	20.1077
52.7723	16.6887	63.3378	22.655
39.3233	18.7162	33.7727	19.4484
35.3162	15.7537	36.3365	23.8507
32.8535	19.0403	43.394	24.2369
30.6737	18.7119	36.8113	18.3755
34.5548	16.261	27.7421	28.9194
46.4154	14.5052	36.8745	17.6726
33.201	16.8238	36.1342	23.4508
43.805	18.2187	33.7952	19.779
34.7744	18.8733	47.2842	23.1533
33.516	16.0254	34.3489	19.0502
32.1007	19.9232	32.475	20.1467
38.3414	16.1402	33.2856	17.623
30.481	24.9301	46.8145	21.1867
31.7287	16.2186	27.7536	25.8623
34.2142	45.2618	366.263	22.1538
43.8611	17.8309	45.3746	19.1182
39.8378	19.3057	423.087	19.3067
27.6033	16.2004	42.7916	22.0348
29.9146	25.7739	44.9364	39.0881
32.4072	18.4517	30.0379	25.4112
36.025	17.6066	38.268	22.3744
41.4752	19.9666	45.96	24.7453
35.3228	19.5463	33.3834	19.8066
29.8298	17.4485	45.1663	26.4322
34.9155	26.2587	40.3343	21.4347
45.9549	20.5761	53.2172	76.2259
31.8629	17.8337	39.2325	21.6539
29.2434	23.7591	41.6717	19.0983
221.292	21.3901	51.9259	22.2917
91.4868	50.2011	289.28	32.7767
47.888	19.7947	42.5691	61.0488
30.4242	31.0077	38.5871	28.0211
47.467	21.588	46.6072	20.9651
38.324	26.2461	34.613	19.5533
32.1666	23.0547	319.544	30.1811
32.0816	21.6042	33.3209	25.496
62.0087	34.5137	48.2727	19.1837
20.8537	18.5128	37.8813	25.4853
21.5845	20.5637	44.6902	19.9549
27.1338	22.0143	34.1148	25.686
21.8964	21.7945	64.7066	19.688
32.8535	22.9888	50.4453	24.5102
29.21	22.8235	42.9778	23.0632
23.1172	18.0131	51.3772	25.1408
31.9945	17.9046	39.9134	35.6059
29.6498	17.9022	214.735	21.7861
35.5876	15.4714	60.6058	24.7131
19.574	22.1016	28.2541	23.2388
31.1733	27.1406	37.2691	27.8045
32.4993	16.9617	54.8734	36.5036
28.5715	20.9329	68.0096	21.0825
23.2392	24.2681	271.587	21.7619
24.1548	20.693	73.1406	27.2662
22.8737	17.5887	56.0444	30.8896
30.9857	16.3854	38.0822	24.6003
32.5754	29.9945	39.3269	36.1226
22.4169	32.8307	32.9442	30.9676
28.2353	40.531	49.846	26.8281
24.2077	18.4601	49.5292	23.0109
27.8747	32.509	30.6137	55.1305
29.6133	20.8124	42.5966	20.8561
32.8839	21.1302	45.8731	27.3948
21.5061	21.849	33.5675	32.2506
34.3854	19.7674	49.0115	21.133
37.5147	22.7539	46.9854	29.0483
27.7846	19.4629	24.4065	18.729
33.0691	24.2215	28.5397	20.3281
33.1642	29.978	30.878	26.4081
36.1362	18.3228	35.3121	38.385
30.1879	19.3512	25.3661	40.8299
23.0508	28.5136	24.766	60.0705
27.0076	31.9212	25.2425	23.7291
32.0283	17.4991	26.5494	27.4059
32.944	33.3378	31.7764	34.1738
32.1489	18.9932	31.4613	21.1494
23.6646	23.7635	25.0518	16.331
34.7381	19.2025	26.3538	16.613
36.108	18.7806	25.5012	21.997
31.89	122.828	25.7306	22.0815
35.6205	21.1461	45.9978	55.887
35.0864	23.6449	24.6889	24.0668
29.5363	22.893	39.7135	25.2029
32.7	23.636	38.4211	19.3755
28.9614	27.1432	24.4841	29.4714
48.1546	17.7967	35.9766	18.7645
57.0845	104.376	35.7642	22.6045
31.7933	16.4923	22.1352	20.093
34.8541	33.7682	31.9376	33.0278
46.7714	11.2964	32.8594	22.7944
31.6434	14.9822	61.1599	22.336
38.4708	17.2765	30.3457	87.3028
130.802	12.9927	26.313	20.1433
37.2454	17.0066	49.4964	29.0226
36.1971	18.3882	245.238	21.6646
30.1705	12.2959	88.7484	23.8155
33.1301	20.3211	38.1853	26.2563
25.1507	15.7132	49.6776	25.8596
36.0601	13.8366	28.0644	21.5945
29.4765	13.9137	35.1802	21.0292
27.0117	16.004	38.9119	26.136
29.7428	19.2144	39.9411	28.4367
29.5927	24.0127	24.6697	27.3175
38.0301	13.2953	36.2544	23.0571
42.0681	17.7296	41.5682	164.009
55.3406	15.9491	22.9859	78.3391
32.2008	13.3279	37.4427	34.3581
37.3678	12.5415	32.3675	46.3914
38.4398	18.3938	34.9966	43.1483
35.7008	18.6404	36.2113	26.6536
38.1415	17.9035	30.9308	59.1827
31.1293	17.4554	134.974	44.8007
34.315	17.5669	28.4568	17.3434
27.9411	15.7408	31.4754	15.9786
29.1157	16.088	44.3006	16.6614
41.0806	283.361	38.2254	56.7574
33.7633	13.924	51.3789	16.5915
23.9216	16.4315	44.2371	15.2175
36.4083	14.7989	49.9246	14.8922
54.9362	17.8603	43.5049	14.3745
37.3596	15.4208	33.9408	16.7001
40.4959	18.9759	36.0201	18.9336
28.8816	15.4085	46.4926	18.8529
45.4662	17.6068	52.7051	20.6868
36.1807	15.4522	36.6194	25.8117
32.3659	124.906	183.085	15.9361
33.2103	14.318	59.6174	19.1242
30.8349	20.0066	36.3384	20.0433
35.5552	24.3222	60.609	26.1277
36.287	28.071	47.2656	36.8718
32.2998	15.0443	26.228	23.8931
31.2205	14.9472	49.5692	15.0633
41.1861	15.3676	37.7206	22.1499
35.0434	15.7432	49.7372	15.7801
36.0776	16.3802	34.0147	16.1186
39.0937	16.1475	49.4092	23.1282
42.3352	17.2489	35.0583	16.4437
56.8005	14.6484	34.7178	16.9093
38.5348	19.1458	53.8042	34.9867
29.9875	34.7338	632.757	17.1001
35.8489	16.4298	31.6136	19.6058
34.2636	23.8724	29.8288	18.5378
40.0743	16.4307	48.1957	17.0269
25.5872	13.8649	40.3035	19.486
127.916	52.7888	36.7952	18.8356
94.255	15.0182	36.1632	17.6871
67.0488	18.243	38.3836	21.3661
47.0162	15.5345	41.856	18.4192
69.2947	18.4939	51.9064	17.3268
32.69	17.1281	57.4705	19.4266
41.2615	16.1662	49.4967	20.9446
28.594	17.3723	42.3059	18.4975
27.05	38.0944	46.5189	20.3558
48.3672	43.0406	52.5025	18.5307
34.346	17.0758	40.9897	18.4435
68.8625	78.4151	44.6853	113.25
44.5543	19.9325	36.1119	19.3973
56.6578	28.601	30.9309	23.9993
33.2288	17.5091	68.6837	18.3278
34.6745	15.4759	61.8462	19.3537
19.7283	37.5399	39.451	18.1519
30.9034	17.0428	43.1843	24.8899
26.4966	22.6843	39.3829	19.6002
23.7727	21.6054	33.0268	17.5771
37.4808	15.03	19.1324	84.4248
25.63	62.1936	23.7432	31.3088
34.7195	83.9487	34.1766	25.683
26.5791	19.435	21.324	20.9339
26.8605	22.0088	39.1294	28.6983
47.6238	20.2712	23.0733	22.0845
28.0102	22.6418	21.8222	27.0201
37.646	48.5237	30.9269	25.5895
20.367	35.999	36.7154	21.7731
44.2393	19.3168	23.3677	24.1673
22.033	27.3881	23.4137	19.0336
34.6188	22.6427	36.566	23.6318
33.4525	28.4887	30.6285	21.0207
35.0643	17.0937	24.0289	21.2075
34.8638	44.4088	30.5426	23.0372
28.8268	21.8423	19.9792	17.3634
33.2329	19.6557	22.6215	31.0608
37.467	47.86	26.166	23.0979
38.8109	23.2685	36.3665	33.5348
36.1319	37.502	30.635	31.0447
23.4183	20.0376	25.7477	25.3827
36.166	15.4077	32.4779	39.6157
39.2804	21.1515	33.2765	21.3024
28.9157	18.6985	24.7941	30.9438
32.0649	39.8445	26.2543	19.172
38.039	22.2077	33.724	22.3933
27.4318	18.2803	28.6056	20.5571
44.4591	16.5809	33.2385	21.0925
28.1044	25.9843	28.5959	38.7093
46.1215	21.2163	27.0006	32.2444
24.1734	20.9169	42.7865	42.8522
35.5764	16.5982	36.2464	20.9088
33.0917	18.7234	145.074	47.0029
27.8311	22.3981	32.9508	29.6703
32.0445	24.455	24.9086	25.4582
42.5415	29.0123	36.1341	27.2821
40.3441	26.4475	29.7738	23.2049
36.6587	23.3703	21.1867	33.8327
30.0494	21.8671	38.5076	32.1807
40.0726	18.3859	30.5228	21.0463
44.0022	20.0495	33.0677	28.0255
29.8586	34.9482	33.3535	21.4403
42.0916	20.036	24.0546	32.1847
43.5094	25.5844	43.3397	31.5853
34.9304	27.7186	31.605	29.6795
27.6827	18.3377	24.8664	18.6353
43.2439	19.5166	35.5894	25.0139
51.1638	16.1543	33.7675	21.0943
40.7645	17.995	33.8984	23.5089
32.618	43.3449	45.5638	20.2652
46.9504	19.6175	43.6764	25.4158
46.1745	18.1598	29.3775	21.5899
34.5913	26.6281	37.6233	17.8455
41.9879	25.7223	40.1552	33.6897
241.129	23.1843	36.9858	18.7027
30.8511	24.195	39.4278	20.9986
48.4099	21.8316	30.7034	22.5542
63.6819	15.9852	36.1245	22.8866
26.3569	24.3289	33.8784	22.846
43.2269	29.7209	35.7583	57.8175
40.6709	25.4794	40.4811	23.9627
30.4592	16.6367	40.8276	22.4196
50.6117	10.8569	29.6168	21.508
32.8244	13.612	44.1342	25.964
40.432	14.8007	42.0172	18.9246
47.7961	16.8403	31.9788	23.2978
38.4512	32.0823	35.1737	41.6616
33.9617	18.303	39.8277	17.4972
41.063	16.6189	35.6096	15.1397
27.063	20.4222	28.9707	13.4629
30.6405	23.6489	37.0739	13.8629
45.1785	16.4157	33.1319	59.4038
47.4307	17.8649	43.5934	14.4362
38.6836	14.4982	56.7501	16.553
46.0887	23.4037	39.0922	12.1318
32.9491	15.3519	31.0469	16.0264
42.3969	16.7493	47.5079	15.9523
40.4068	29.3837	45.557	16.1037
56.1287	17.5559	45.7705	33.3071
37.1816	15.4275	39.1148	21.2921
96.8213	17.1059	36.511	16.4243
51.8433	22.5298	38.1507	17.4495
60.115	17.3156	43.1397	36.925
57.7814	18.8568	42.1221	15.2426
34.6277	32.0066	47.622	22.877
41.3741	15.1218	39.9735	33.4614
35.8167	17.225	45.8579	17.7012
46.1942	15.1724	32.8714	31.6424
216.062	14.7346	50.8854	71.7454
35.2634	16.8623	39.6017	18.6603
36.5402	21.2069	33.3898	87.4682
61.1134	13.9958	41.725	20.5642
161.739	20.407	41.8004	22.9255
52.5161	14.3501	38.3738	25.6374
31.5219	16.3519	45.8156	18.7396
31.1521	17.6786	137.616	36.5982
32.7532	29.3942	44.3884	20.8475
36.3279	14.7356	47.9415	30.1962
43.3874	20.1723	41.8784	19.2031
49.563	16.6241	33.4381	32.6775
45.2544	15.7487	46.4753	18.6279
28.4436	17.8203	50.918	24.7913
76.6233	22.8994	25.4939	18.8967
32.3503	15.8578	26.8772	18.5552
36.9573	13.8506	39.1689	23.164
51.3793	20.1422	81.175	19.2689
93.7483	15.3079	41.4119	33.0174
44.5258	15.3097	51.8636	21.4799
55.9838	17.5688	35.2837	26.9399
38.6714	18.0939	459.915	22.4637
35.2682	18.1724	46.9648	114.186
49.3254	15.3125	33.9693	18.5885
49.7654	97.0124	26.1852	18.3946
40.4082	26.2615	155.473	22.3057
42.2543	97.9217	31.6522	19.1356
35.1049	89.39	53.085	20.3469
36.4966	17.1705	28.8296	20.6147
30.3689	21.4116	22.9791	163.605
41.0204	14.4508	33.5404	20.1694
20.9679	22.737	27.018	20.4469
22.1781	21.1322	26.8688	25.9235
34.8182	30.833	24.7058	32.1568
23.1665	14.23	55.5105	174.428
31.8032	21.9707	33.931	25.3071
31.0001	23.7661	43.3763	23.5548
33.173	22.8004	33.5874	22.4163
37.2186	19.4711	35.9381	25.8335
29.9967	20.7841	51.1751	38.6522
26.2158	20.7906	32.5475	38.4607
24.9089	15.4842	28.6237	28.9281
28.7048	16.3062	37.9631	23.8257
30.5343	40.8668	45.2165	32.162
26.2651	151.884	31.7175	25.8635
40.2602	33.9131	34.3064	29.254
93.3859	17.8496	63.6736	25.3141
35.4778	22.9278	38.3373	22.2986
26.3382	19.2793	31.3557	21.8028
32.1302	27.0686	36.4354	19.3982
38.5956	17.9574	27.1527	23.716
44.7493	17.3551	40.8864	20.8784
37.0415	86.537	88.1873	17.5146
48.6843	21.9846	65.1978	13.7702
32.3105	20.5237	34.7248	12.9617
35.1885	27.1371	47.354	15.1436
36.5078	21.4596	57.2448	28.5621
33.7722	32.3621	238.684	15.6899
50.5368	16.9064	32.9384	17.4769
34.364	32.1759	51.8558	16.0793
30.1862	20.415	39.5834	18.9481
30.6154	19.565	40.6945	21.1786
31.3757	17.4509	34.7039	13.5271
26.3208	19.8126	40.5529	16.0218
32.2262	17.2205	50.8071	26.3968
43.7352	21.1584	42.6762	15.6865
42.1463	35.0771	34.7033	17.5351
38.7199	38.4121	31.996	20.4987
49.717	17.7542	40.4642	16.5876
24.6984	21.6853	43.2603	28.5418
45.8332	23.3948	31.3781	19.7756
36.4789	17.8533	32.2094	20.6831
31.4395	24.0851	38.1602	17.7737
35.9213	17.5737	58.4334	14.462
38.0815	24.9675	32.56	24.4852
31.9511	23.9645	45.5503	45.6032
44.5889	19.8326	73.1689	14.7708
41.423	22.0423	29.8321	21.0813
34.2918	22.0699	37.7525	23.1179
47.7914	19.3653	50.4208	23.3728
37.5036	22.1221	40.4079	27.9908
33.43	18.529	38.0471	35.9884
43.8774	20.702	38.597	23.0089
44.0738	27.6842	49.6444	28.3589
32.5158	15.5054	54.5807	15.5281
36.7532	27.9242	37.1696	37.9362
36.2949	23.2992	43.9705	16.0235
33.124	15.9863	52.6466	17.5654
41.5894	29.3751	40.1403	25.3089
44.3887	26.5136	46.6557	21.8493
38.6692	27.2015	31.6429	21.8303
32.0899	24.4427	39.444	23.3852
45.0301	21.6427	64.4996	19.1462
45.7117	22.0324	42.8804	33.7621
39.8368	27.8196	57.0788	23.3327
35.8424	18.6222	35.6516	26.435
32.0477	54.2351	298.244	24.7053
37.4784	18.5539	64.9478	30.4877
55.8813	25.8688	34.7522	23.8717
61.1569	21.7563	33.5252	21.1519
62.0161	31.5215	285.076	20.0173
35.396	74.765	60.0325	22.6879
29.6003	22.0024	34.5843	23.8985
43.8377	22.2568	40.5641	20.9598
30.644	17.4852	27.6303	17.9378
31.5394	36.0497	47.0219	23.5847
36.4769	15.2429	29.4917	24.5014
68.4607	27.6047	27.3161	27.6628
36.1022	26.9441	30.7011	21.9821
35.2187	27.2084	37.5668	23.2669
40.5725	18.4916	22.1614	23.8969
32.1968	27.8327	32.9967	29.4992
66.8967	38.4301	25.1515	47.3575
28.6506	22.9769	30.8642	19.1212
39.3005	25.6858	34.2472	32.741
42.0288	23.4907	30.9408	23.2675
47.5544	24.0399	160.478	23.1505
24.937	17.6603	27.5078	28.1809
32.5032	21.0658	26.2578	44.847
30.8301	21.9542	30.7461	26.0214
25.0876	20.2784	29.6596	36.7703
32.7548	14.9862	158.558	25.2606
34.6457	12.0921	35.1763	24.7343
18.4578	15.2592	32.4023	25.155
17.7896	13.5219	30.5176	21.094
28.9474	14.3303	51.52	19.9441
25.6095	13.2645	34.4744	27.0657
23.6969	14.4386	30.5305	32.2361
26.7391	16.3174	32.9175	30.0485
30.2972	18.5901	21.7523	19.7309
41.7589	14.2567	24.1589	18.9495
31.1868	17.7558	37.9677	23.95
21.6161	11.849	22.0198	29.6453
21.5534	22.8374	44.2071	35.5413
31.5428	15.0461	20.8067	77.461
23.8342	24.951	24.3597	31.6855
32.371	12.4232	29.4195	84.5264
32.4727	15.4221	26.3561	34.7969
36.2366	12.9123	64.2442	20.2053
28.8543	30.1578	32.3436	26.8366
22.9509	12.7853	54.7643	19.0191
23.6793	21.9131	66.7436	20.297
34.4003	13.1659	25.0539	26.9676
28.6089	21.5654	25.3635	83.1559
28.7412	18.873	21.5369	19.2766
25.7994	18.0064	37.3102	18.6007
26.5757	16.3537	38.3511	20.7178
51.0424	20.1105	26.9481	22.7243
34.278	19.8556	37.6672	18.5032
26.3617	24.0056	31.4626	20.6658
38.166	17.0478	28.4182	21.5221
28.3116	31.2188	40.4211	21.7715
20.7886	16.6187	47.6904	17.2313
35.0021	90.4798	33.4212	16.4989
20.3993	21.8064	24.4692	14.9666
38.0174	16.663	30.3653	14.5458
65.5086	39.4522	128.265	17.406
30.6996	23.2046	59.7202	14.3075
25.4435	15.9783	29.9821	18.065
34.4397	15.3013	29.0969	14.5777
41.0196	17.481	29.7742	119.647
31.8069	25.0851	34.0842	16.3385
30.093	80.2418	29.3508	14.933
69.1892	17.8635	29.2307	15.5511
29.5687	17.7465	36.5184	16.0699
38.0483	18.3837	36.07	19.455
29.2189	15.4977	35.3663	16.1274
36.1938	14.5618	68.247	18.7288
54.2218	23.1149	31.6779	19.2238
29.6379	14.2181	40.3967	21.2672
35.806	15.0654	44.0114	22.067
37.8913	20.3237	34.2326	45.7789
42.297	19.5042	40.3967	16.2222
92.1636	15.2438	36.7442	34.6374
31.1012	42.1744	46.5262	23.2422
39.9022	17.8176	35.3443	22.6729
47.0969	38.7388	40.3086	28.7041
37.341	21.7996	37.0359	17.4521
38.9183	16.797	36.6816	18.8642
29.3106	30.9977	36.7029	16.6055
36.6146	14.4679	59.8221	25.3481
29.1412	18.9306	77.2102	21.8556
85.0827	20.5286	49.9355	20.3667
31.0765	21.6885	35.8077	20.1471
63.6265	15.0829	46.6115	17.0296
50.1359	24.2806	40.1256	18.1698
31.126	24.2551	81.3374	19.5309
39.1532	23.8691	47.8619	17.6548
31.637	18.036	46.4116	20.0998
31.1348	20.4439	39.1794	21.2472
55.6228	25.0328	36.4985	17.0777
26.4006	18.24	39.6834	19.9494
61.8834	20.9845	39.9619	16.5806
32.9564	19.3985	38.8019	17.2415
53.1043	23.717	42.8185	22.2024
29.4746	23.1378	35.0216	22.2609
43.1157	23.5272	45.3101	17.4766
37.2059	23.4155	44.6865	19.0779
56.7572	35.2617	37.0414	20.4104
38.3217	27.9337	47.1917	17.7461
33.8343	17.2816	57.0038	20.3714
63.9158	17.9188	43.1647	45.5178
62.0936	16.2828	48.2245	23.2169
46.9487	28.1522	35.621	18.8011
55.3929	17.6378	58.8506	34.2046
19.2467	36.1739	46.4435	20.4473
34.7188	22.2324	32.7448	19.1501
52.2785	18.9072	48.8341	25.5537
83.0831	28.8085	36.5417	18.1524
69.3762	22.8382	40.6456	26.5404
39.2869	170.334	90.27	40.4055
34.7756	25.7811	38.2082	18.6056
26.655	18.821	48.7446	18.5949
35.8444	16.4674	48.265	21.7111
41.626	15.5092	34.6371	24.8444
50.5032	21.6807	53.6909	19.7615
29.9193	45.9166	34.2171	24.3122
48.4726	70.0485	71.5758	24.3005
67.6999	20.2996	46.0183	40.1342
62.9535	32.3781	34.2562	26.0607
41.513	23.8961	46.5116	22.6052
39.6486	22.2998	45.0248	100.069
32.1961	39.1996	38.6466	20.8406
29.4998	19.632	53.6605	23.5589
52.881	21.0719	48.8831	22.9773
89.8145	33.0096	43.5718	22.4506
34.3334	25.2748	42.8257	21.8465
33.8882	28.677	34.8062	20.4165
69.5751	17.939	44.8654	23.4463
29.581	18.1994	45.8395	26.0538
64.5462	30.0051	33.2286	174.143
40.9294	18.6716	35.38	25.5725
46.4988	20.775	23.035	28.2534
43.6143	19.9135	20.0779	27.726
48.3559	73.1641	28.1936	23.054
52.0176	95.2714	58.0491	19.5928
37.1749	19.6049	41.227	36.6926
34.0649	20.2562	33.8185	17.2249
39.0829	21.2481	28.5535	26.1144
49.5141	18.9103	20.8752	25.1721
31.4752	19.1291	20.212	24.3669
40.1661	22.338	36.3369	20.4271
74.8502	22.2004	33.8643	27.3778
34.1656	16.4563	36.5259	25.5367
57.0007	36.4224	30.8224	27.2658
33.2777	32.3231	26.6217	28.4123
43.8085	22.948	34.269	49.9527
35.6688	19.2152	24.2409	22.2643
68.4629	68.3178	33.0379	21.7468
29.2909	22.1825	46.2774	45.936
41.4613	19.9525	31.9955	34.5166
48.5624	20.1172	41.6775	25.1067
47.8518	16.4327	29.1137	40.7232
36.4608	17.585	49.717	33.532
50.443	46.3386	28.5594	39.8727
41.6353	63.6288	25.9207	24.0584
50.7174	24.3428	35.9471	28.5372
37.7698	20.7456	50.3679	20.7742
41.4631	28.2991	30.4002	19.9416
32.0925	18.0805	42.7256	19.9661
29.4222	17.5315	29.1936	23.0772
19.5533	23.6528	43.8994	41.4044
116.695	21.2943	48.098	20.7571
38.2867	26.2864	29.2051	34.566
18.815	18.5387	26.2537	20.9375
29.1027	25.9269	29.4214	22.0187
24.8664	19.5516	38.9311	25.0006
23.6182	18.7928	39.64	30.5216
25.6761	19.4053	29.4007	21.6549
16.119	17.3102	46.7224	19.6593
28.5507	16.2523	39.8672	13.2537
30.4085	13.0319	45.6419	12.8585
50.7424	13.8804	28.7656	16.411
26.671	12.7004	28.4645	16.0018
20.0326	12.4874	36.5846	17.3645
27.1424	14.3482	36.5142	15.1445
32.0714	17.363	87.9115	15.1267
26.3673	14.6871	40.65	17.6716
30.9337	53.0246	33.0487	15.4932
45.2761	14.2748	81.2264	21.8015
30.3685	13.6362	29.3973	13.7982
23.0271	13.2692	35.6681	17.7111
27.531	13.8062	48.4689	13.6787
27.798	15.2263	29.4389	17.2264
24.0392	12.7263	68.0844	16.9548
23.7439	15.2616	42.8978	23.706
29.6402	15.0088	35.5894	21.1624
28.3266	13.2691	39.7913	33.5324
80.9	17.9978	28.2899	21.1268
31.3853	13.4699	37.0752	116.235
29.1296	15.9539	67.9144	18.4276
26.5898	14.4864	37.8385	25.8412
22.4787	14.748	39.5726	24.1216
32.4499	24.1088	62.5249	22.7695
27.9925	15.4567	489.105	26.1396
33.3334	16.5467	40.6087	80.3924
31.4091	16.1322	39.6483	99.9517
28.9295	17.5209	46.851	19.9137
21.6096	14.9332	30.1709	20.4198
29.2641	16.1969	88.1173	19.7618
20.7436	17.6009	39.7291	210.249
23.9662	17.3559	27.368	23.1299
33.4867	16.2521	52.489	25.1671
70.2542	18.054	30.1384	17.1591
27.3902	15.4306	36.5657	18.1304
35.7555	19.4642	40.784	22.0259
34.3822	20.8022	27.4069	19.4592
46.083	19.2164	37.1498	18.9402
35.0397	18.1889	37.5688	18.5551
25.1209	20.135	28.1929	22.9109
53.4896	18.717	48.7994	26.4356
42.3087	23.1604	43.4447	22.1417
22.9624	17.6505	33.809	21.014
27.696	84.8298	41.4948	40.1377
38.2469	45.3105	60.8505	164.523
30.147	21.2704	41.4596	20.6692
31.3998	16.5263	37.9533	20.9404
33.2244	17.8806	51.4738	20.9327
30.1501	21.3539	38.3281	28.0971
37.4391	42.0916	38.9368	20.9493
38.5237	16.3634	44.0645	24.0694
34.209	16.4117	45.713	21.5627
33.2917	16.5215	47.5374	22.7558
33.1731	21.1579	99.9894	27.4252
33.0971	19.712	56.49	17.6613
59.3303	31.2448	31.9443	23.0677
32.8415	25.2316	47.0493	20.5102
39.594	22.652	40.2567	20.4039
34.2561	29.4234	42.9734	26.5501
28.0341	34.5452	28.5286	21.7011
38.9105	17.5497	37.5318	21.5984
37.1061	31.1367	22.5736	23.9418
29.2161	18.1061	26.0347	21.5039
33.8108	18.1983	20.0625	28.2831
79.9359	22.6786	21.9762	18.2592
52.1406	26.3049	18.603	22.6187
32.6573	16.5365	34.2033	22.5068
36.5212	18.1752	27.2138	21.8739
39.4712	19.6279	24.3108	20.3093
38.5371	93.1067	25.1963	20.217
44.9247	19.4963	32.3041	23.6626
29.9434	26.7352	27.4918	41.2725
36.1591	30.9447	35.6757	19.6294
31.6779	20.0559	22.4461	24.3935
32.0191	17.1082	24.3676	22.2626
40.3464	22.1099	29.088	24.0476
38.4711	21.5574	39.2158	19.3151
46.4759	17.6564	27.1683	18.2111
37.9986	27.1765	33.1598	22.0995
57.705	20.3225	25.0626	27.318
43.3636	22.0714	47.7548	20.9222
59.3741	22.965	23.6555	51.4863
115.954	19.9612	35.3864	25.1046
34.8926	54.7315	32.4633	26.4229
32.4422	17.5094	22.1168	32.0518
48.2961	23.1105	59.7998	24.0804
43.3577	26.3303	31.0815	21.2779
41.5138	21.0576	60.0433	21.6628
39.0182	22.3035	38.1173	17.9844
88.2639	17.7953	36.5919	19.1816
39.9825	17.5925	37.3684	18.9128
54.9124	18.2377	29.3737	15.0912
57.9502	54.2635	53.121	17.3136
46.7902	21.0402	33.786	15.6656
70.0574	31.4635	22.3611	16.9051
39.443	28.3016	29.7724	14.3804
29.0563	29.6762	39.6323	19.6475
45.0737	21.7025	35.7759	20.0868
32.3013	18.2032	44.4534	24.7372
32.4437	20.1193	93.1077	22.1283
31.3734	33.3711	55.0357	36.506
40.0445	25.5594	35.3166	20.2158
39.8909	22.1844	36.1236	15.5999
42.1814	27.6967	31.4545	13.8827
45.8693	33.548	55.0841	18.0599
36.216	74.8057	58.2966	14.7592
37.3503	20.5204	34.1106	21.9949
37.2352	21.5396	42.4424	38.7061
33.9686	227.749	47.6255	18.5904
33.7307	41.5222	34.8781	25.4493
38.4009	27.3334	56.5798	30.0099
41.4155	25.447	48.5293	24.2531
29.4892	17.6715	34.7397	15.7672
46.0209	17.9056	32.985	15.2483
43.6022	11.4354	31.4745	15.7262
25.7044	13.75	35.3374	21.7712
34.9844	13.3649	29.7119	20.1703
19.7894	14.1113	47.8396	19.2349
21.0181	13.2023	60.2756	25.0603
22.1792	15.12	35.5874	17.7873
24.3203	12.98	40.2376	17.3504
19.5486	15.4096	42.1136	25.0019
24.5445	13.7881	44.6813	20.8387
22.78	18.286	28.3317	22.668
21.9622	16.5281	38.4344	21.7134
25.0509	14.2435	32.3428	17.7612
22.3306	14.3675	31.6576	22.4802
23.3654	13.4903	44.3555	23.4714
58.294	15.4714	29.8063	23.7931
29.8533	15.5433	37.4148	18.6118
27.1217	23.2492	46.0965	20.4087
28.5635	13.0585	30.895	18.4179
50.1584	15.3838	40.6949	21.9631
41.585	16.0978	37.4118	21.9673
30.9118	23.9668	39.6158	23.002
39.1659	15.9613	71.3111	20.8562
29.3417	17.2321	31.4186	17.5839
22.5223	17.4625	90.7344	18.9822
25.5118	18.4647	49.9852	17.5178
26.9176	15.8638	32.3215	22.5962
27.9832	17.6241	26.6969	21.2248
49.6475	18.0393	34.7091	27.4443
29.7446	16.7066	45.1737	24.6856
62.8013	16.1294	48.7208	18.6015
23.5567	35.4904	90.778	18.1894
39.396	19.7251	36.2968	19.1259
23.7553	15.8888	71.4541	25.5065
27.2368	16.1427	31.0964	19.3415
101.932	13.9416	32.4668	22.0502
26.9646	16.9388	83.1941	19.2516
42.001	27.1445	31.4159	19.4566
35.7664	16.2315	44.9083	197.312
31.3876	17.0109	42.005	33.6105
38.7596	28.6701	96.7351	38.9604
28.9186	17.6295	48.5289	25.1008
27.2887	31.9344	38.1347	19.2058
23.0766	27.0484	37.0588	22.2305
32.588	16.8133	71.4067	25.9177
26.8573	18.9747	30.6478	21.585
40.0805	19.2076	39.5307	35.7929
32.5125	26.3424	40.8751	22.2091
28.9052	20.3388	54.7741	20.4871
42.9952	21.9115	33.6386	30.4796
42.832	22.0242	44.857	22.4911
43.1197	42.2858	43.3646	34.86
26.8038	26.009	30.4839	69.8231
34.72	36.5154	36.8903	35.1703
45.3563	26.9518	39.5574	28.5395
42.102	22.569	54.671	23.1298
42.89	21.1687	37.2392	22.2177
29.3608	17.4963	31.0624	22.6233
43.7665	23.7919	44.4919	51.3198
58.383	22.9766	42.0968	21.6558
57.5868	29.6411	36.9333	29.4433
91.0104	22.482	31.8564	23.8862
29.1983	26.1959	49.7126	29.3659
49.5315	40.5623	60.3923	28.6438
66.9074	20.8119	40.6289	31.9206
26.9196	21.2898	44.2299	19.7285
48.3446	22.5948	38.4124	23.7951
29.5049	17.9394	28.1025	21.1676
29.8909	29.1502	38.2944	22.132
34.3851	17.4521	319.413	65.4514
24.5705	28.9027	66.5071	24.4331
36.7041	28.3381	33.5312	26.6463
44.7219	18.998	29.7181	27.3149
90.3478	22.7972	27.0214	59.9736
45.8661	15.0689	21.0485	25.667
46.0313	22.7127	20.2569	34.265
44.0991	19.6259	16.5424	50.7943
35.0186	19.8784	24.3066	27.3542
37.2398	13.7508	73.8011	20.7428
60.9415	17.6702	25.9141	25.2101
49.5136	16.8225	45.9178	17.5003
33.3908	16.7024	31.0279	13.2941
42.3439	18.1001	35.7311	17.4052
42.9143	16.2366	29.1827	15.6095
26.5505	13.6727	33.1284	27.5862
46.2428	16.4144	30.3793	21.7732
43.3034	21.0229	27.0955	16.2206
29.8754	15.9617	27.2778	24.4667
39.4203	13.0926	25.035	14.5302
59.1626	13.5054	32.0139	14.9361
32.0141	13.5808	46.076	14.9941
50.2732	21.0158	37.076	14.3543
35.8549	30.8985	33.174	18.9749
122.116	18.3647	28.3066	27.678
35.7516	24.0147	27.0185	15.1787
30.2138	23.5718	35.9942	16.717
39.8487	14.7307	27.6541	16.1833
42.2035	18.5789	27.4941	15.4698
89.0642	15.3731	61.178	13.3549
40.0256	35.0973	28.6545	14.8786
31.3396	18.7176	67.7927	17.2513
35.8713	27.7706	25.0463	25.1132
28.1162	14.9	30.4117	132.648
40.7295	22.2042	45.6016	20.2369
57.5802	22.6483	28.6338	19.8353
27.9573	26.1112	59.2843	23.6097
34.2369	171.347	33.6732	19.7957
29.1028	247.513	29.9177	17.5073
31.3346	16.0909	34.6776	26.6707
29.7269	21.779	39.0334	19.8207
40.4923	16.0101	36.2609	24.608
70.2962	20.3431	30.0759	18.9427
29.9489	19.703	34.8129	45.8906
32.1942	15.8313	44.6281	22.7224
33.7065	21.7264	32.9967	18.567
31.3593	20.2173	34.6497	37.3496
36.5749	28.0552	34.3089	19.9348
39.0707	19.8504	36.564	19.3641
46.4931	26.4091	51.9812	20.3807
31.5825	17.7272	33.6274	27.1731
36.6661	16.7631	92.7429	17.9529
206.356	17.0334	44.6683	21.8864
34.6303	30.9573	32.7806	23.1378
35.7591	18.6324	56.2844	30.0035
34.2908	17.776	31.9624	20.8299
31.0334	18.5611	38.3699	21.9728
215.17	25.2858	65.7482	20.5891
25.5723	17.327	46.4772	24.0764
24.4357	17.6784	117.874	20.6537
22.8775	26.4251	86.6013	29.7685
30.1627	21.5431	32.2999	21.5185
23.5448	18.1979	47.0639	24.279
69.3297	18.9538	88.918	21.8131
24.5344	19.1983	36.9754	29.3777
30.2621	19.6714	50.4234	23.0732
34.6923	26.7186	42.6045	37.2876
23.3357	19.9995	32.2038	36.6376
20.4226	20.5587	31.0949	29.9014
44.2851	22.2338	37.628	21.1421
57.216	16.7185	48.5289	25.1426
31.8201	21.0046	29.3538	25.2886
32.4074	26.1447	28.7923	19.8598
22.0789	18.8002	88.8122	23.7787
32.4265	18.5011	57.6984	30.8564
19.5445	25.8646	44.153	26.6696
30.9311	38.2999	53.2795	28.7895
68.5723	24.8033	32.8351	27.424
45.6298	22.4005	35.6002	33.2935
56.2304	97.7058	37.1976	35.0759
27.8083	28.2441	43.41	239.718
38.7955	19.8499	46.4787	30.999
46.7208	31.0877	37.4816	39.5558
25.0583	20.7518	42.9267	26.3212
23.8774	23.6586	142.909	24.2457
23.6905	81.5049	53.3854	23.091
32.8028	18.4174	46.2252	28.1355
30.0301	23.4746	37.2104	26.443
41.3271	19.1892	39.1435	31.954
34.0367	20.106	56.5532	26.0881
28.8707	21.054	129.416	39.6453
26.5484	28.6096	36.0698	39.2905
34.2358	18.7216	61.2751	25.7791
54.7405	21.9763	44.3666	40.1074
32.0398	27.3291	62.0637	21.6877
38.5203	22.4091	32.7044	30.2706
33.5281	26.1691	30.7095	23.7398
34.1725	23.1112	55.1188	25.6474
31.9963	23.5461	29.2138	21.8643
40.5219	19.8509	47.7457	26.1362
33.5737	19.8962	37.2856	24.578
29.1131	20.6793	40.8244	30.7826
30.7522	19.2181	37.1519	22.8622
30.6234	18.2671	43.9591	20.0271
27.9165	18.8375	29.6317	63.9306
35.229	19.5094	71.2456	27.493
29.4084	22.7066	33.8145	31.0399
33.2392	26.1341	55.4783	24.5399
29.0051	23.4388	33.038	22.9047
44.2927	19.4431	41.9087	26.7548
26.0834	75.4058	35.8777	21.3087
54.0946	26.2717	40.965	53.0024
31.0967	31.1631	43.061	29.0821
52.1136	16.0363	32.3393	26.7474
37.6761	14.9794	50.5706	21.84
42.0841	17.0921	36.5247	23.1682
43.0562	15.2523	39.5596	25.1716
32.1576	13.3825	44.9551	33.9699
38.2142	77.9976	38.3908	32.4878
40.4303	15.4859	42.4665	35.3814
28.5864	27.0167	33.5459	29.1274
36.1808	14.9003	29.6485	61.7012
28.8586	20.8482	32.8411	47.3928
41.71	32.434	28.9847	24.1127
45.432	14.7532	30.8553	21.12
26.8478	91.534	25.4691	29.8074
40.106	18.8466	37.675	37.2954
27.6192	16.4781	25.5686	33.0844
53.2768	15.013	23.6443	20.4636
31.6151	24.3078	25.9994	31.9259
31.4607	14.7967	21.735	32.8744
32.3342	15.6237	19.4332	27.7714
36.6239	16.2999	18.6881	29.494
33.9513	19.2736	23.3189	32.3322
37.6823	14.2852	23.7295	31.7518
38.9112	14.1141	20.5702	57.9586
33.9123	16.5157	29.8255	35.5437
34.4367	16.2684	23.6831	31.0148
28.916	17.6589	38.3724	30.4626
36.7825	18.7704	34.7892	22.7155
35.8905	18.6584	35.808	29.4826
40.9862	19.1244	29.7337	33.0451
30.1932	21.8005	33.9968	24.3693
38.5563	15.2024	21.7732	28.1341
44.3797	17.0605	51.5177	39.8669
32.3091	26.4746	26.5203	39.4722
41.7525	21.4416	26.4775	42.072
38.2072	24.1178	54.1855	47.8431
30.833	29.9479	40.2083	26.0171
56.8062	22.2082	29.7058	29.8217
59.464	19.6159	41.5454	45.5945
61.592	17.9858	20.3351	33.1041
117.723	23.2195	28.7533	19.5594
27.1075	22.0975	32.9895	33.9261
40.4299	17.2846	37.013	22.8704
19.8082	15.061	30.7868	24.7455
20.0788	19.467	33.8162	76.2597
22.3294	16.8058	31.4743	18.2488
18.2649	20.8765	29.6761	42.5055
22.7809	20.0509	22.3591	15.1507
25.8151	21.8634	35.0864	20.8388
22.0936	20.475	22.9032	15.2159
32.1808	17.3549	27.1153	14.0248
23.5506	16.7233	41.0285	15.882
38.0471	16.744	26.082	15.428
19.784	28.6415	26.7767	16.2795
61.0559	18.0915	25.3338	18.0097
19.2929	20.5125	24.0048	15.6546
31.0198	47.5424	24.1182	18.4994
57.7833	20.6557	29.0745	18.1997
25.2433	21.2229	36.2136	15.7722
22.4324	106.395	30.8634	15.6535
24.592	36.8638	24.1677	25.3601
50.8444	17.4934	24.2669	15.0899
23.8211	19.8173	24.79	20.1444
27.9323	25.2884	30.0974	18.5683
24.8966	21.8453	32.1257	16.5579
30.1183	68.3375	33.8722	21.2107
27.0518	36.9008	51.9294	18.7167
22.0274	28.0427	103.923	15.7467
27.3003	18.0701	32.2355	26.2637
22.926	33.5686	23.9194	17.8332
30.8968	18.6984	32.6085	19.7886
30.4753	36.7721	50.8325	17.1012
25.7252	22.5167	35.9548	14.8772
26.0186	22.4916	35.7136	24.4003
36.8954	20.6983	91.9917	20.8161
29.533	21.1634	29.9829	15.8796
25.3275	22.3495	35.3719	16.0289
24.6645	21.0449	41.1797	14.2736
31.3988	19.2113	28.999	27.2795
28.972	21.9065	42.8958	26.7164
30.6413	24.8485	30.056	16.0976
26.2105	19.7678	33.6431	17.1726
34.9092	20.0035	38.9557	17.9193
32.1662	21.4847	38.5232	17.8283
47.0202	23.4432	44.1569	17.3893
28.3587	22.5726	32.8233	18.8814
27.8337	25.4835	32.708	21.7162
24.622	19.3883	34.0395	17.9326
33.0101	19.661	31.2221	16.7428
63.2645	21.1322	38.0855	59.8303
40.9687	27.2034	56.9447	18.4475
33.9893	17.5863	49.9108	18.7704
21.0363	21.7632	33.0305	21.0571
65.2339	21.8788	52.5237	20.6
40.1403	18.3147	44.7044	17.6043
34.2827	19.6772	40.2196	22.4724
26.0308	26.4886	36.747	19.9693
37.21	22.5275	46.6738	24.9361
46.1924	19.2506	29.6002	26.2154
32.5358	20.5513	52.167	21.5768
31.257	36.9779	178.403	18.5677
36.5431	16.6098	49.5386	21.9013
44.0273	30.2495	39.8823	24.0754
38.5046	22.1418	52.3649	21.6551
31.7778	17.5384	48.8246	16.5041
25.5171	21.6553	43.4827	18.8588
31.7181	22.7196	35.1139	16.3624
36.8993	18.794	49.0784	27.3414
34.4056	20.1309	57.1082	18.3762
42.323	22.0815	39.437	35.5647
31.2569	25.8577	31.3393	27.8615
74.8169	19.8448	38.3752	82.9185
43.0536	30.5156	36.4136	38.4972
45.5458	25.3232	36.3863	18.6157
38.8483	30.626	36.0446	46.0286
53.5129	23.9008	53.0227	32.9995
36.1527	31.3923	34.1703	23.9752
49.1759	28.7365	49.8687	21.4992
37.997	17.9326	36.6518	24.1251
51.2248	23.351	42.1708	21.7536
42.4484	22.1721	37.5317	18.3646
45.2209	23.5198	38.8258	23.9441
28.8879	27.8866	316.126	19.8123
31.0493	27.4877	314.92	29.1602
50.5154	26.9775	58.4975	27.9742
43.121	18.4804	42.0251	20.3614
30.4134	25.8006	39.1749	17.3276
43.5054	34.5393	56.755	25.8571
47.3558	20.6967	37.2736	45.0639
33.4277	18.0074	41.4729	25.1085
33.6726	25.4574	38.4937	27.6842
39.7091	17.4967	48.4742	23.7782
43.8947	18.5833	45.1004	43.2341
34.4766	24.326	44.6381	23.3457
26.4107	12.6623	38.7204	32.7633
17.2724	284.659	50.9732	27.7359
28.1939	10.9884	39.0588	26.2706
24.6855	14.9335	34.027	24.4635
28.4071	14.0076	44.4528	21.2963
23.9462	26.5142	308.849	24.0853
25.9742	13.0009	47.4386	45.6705
25.4049	19.4454	34.4947	29.9822
37.8346	22.3904	35.6003	34.4303
25.132	29.246	22.4157	30.0569
24.9438	14.8573	25.3314	29.2065
31.8426	27.4945	23.1827	30.8379
28.2471	15.4523	43.3201	33.9034
23.9192	14.8103	25.236	37.7568
22.7167	17.4518	32.2308	21.9196
31.9245	31.1087	49.3817	22.9923
20.8742	21.1022	30.1612	20.9135
35.1836	30.8225	28.3819	36.1968
30.8866	14.6749	48.3636	26.291
29.3027	17.8206	28.9681	26.1849
20.3563	16.495	32.008	29.9071
24.1636	15.9429	31.1411	26.4861
26.9945	21.1208	30.0932	31.1272
29.8468	16.1636	25.0409	27.4601
26.5508	18.8585	34.8909	34.825
31.8323	21.0923	23.8636	39.1259
24.8152	15.6126	38.1839	24.8059
79.0251	17.3869	31.8281	24.2262
28.9163	22.5484	33.5182	26.4775
31.9122	23.6335	32.6135	29.7259
31.2344	17.0465	29.2078	23.6604
27.1608	15.2783	29.8428	22.0466
25.2643	16.8766	31.2967	90.2018
26.1454	20.4701	36.9432	55.3484
32.2659	25.6738	32.0397	25.9575
33.6573	22.7358	34.7762	28.881
25.1338	19.2074	30.3719	24.7697
24.7777	16.4525	40.0215	27.7873
188.56	23.248	31.789	32.7914
29.6144	16.8594	28.6021	27.2467
28.6259	24.9896	65.852	34.6261
20.4254	18.7423	28.1576	26.9474
42.6499	17.8933	28.8881	45.8136
26.9497	19.8915	27.8951	27.3378
26.88	20.2043	42.2211	30.2797
28.9337	18.9683	38.1318	32.9011
21.3855	20.982	23.5151	57.4067
30.0745	19.9803	29.2792	45.9825
75.8368	17.0116	23.8997	44.3316
28.9007	16.3813	32.9045	33.4703
36.1792	19.2789	40.6765	36.1431
25.4531	20.4816	35.4372	37.6919
23.4707	18.4847	31.0836	38.6118
45.3398	29.0305	65.4075	19.7544
44.8628	18.1116	32.797	22.1498
34.1761	24.6489	46.861	36.0616
31.564	18.375	37.2887	40.0793
28.7164	19.4742	52.9723	24.8712
43.4376	17.2924	31.7351	40.3266
30.3964	19.9451	35.3466	18.6434
31.7328	20.2324	37.4787	21.844
58.9919	20.1365	38.0984	24.0134
35.0307	17.5974	34.0022	18.0121
24.5906	19.6884	44.9916	22.4024
26.0965	20.642	48.4492	13.6411
29.7169	23.5699	32.9849	15.5659
28.2518	21.0642	40.1432	14.0328
31.055	30.0087	65.3035	14.7696
30.7777	19.4726	45.2296	15.3212
37.3335	20.6798	54.0152	16.3483
34.1854	21.5952	33.483	18.8768
32.8156	21.4064	40.2549	16.4695
40.3036	21.106	61.7514	15.5371
28.4291	24.6033	30.5546	17.5342
66.9464	18.7309	33.1287	16.7194
29.0757	21.8744	47.7693	21.5574
39.1723	17.0058	63.823	14.6312
42.7739	23.7819	51.7564	22.0567
35.0089	20.0653	46.5495	47.6958
37.8514	18.7408	31.9509	17.1475
35.3194	22.3778	42.2629	14.4423
32.7228	21.4634	37.9657	17.3929
32.8451	23.6737	42.7228	15.916
33.4296	19.3236	38.3386	19.7285
44.2031	24.3572	25.4137	15.9901
39.9154	19.2625	45.2164	17.7272
37.9154	20.1434	48.4281	15.2146
34.9894	21.4443	53.083	16.4435
31.9567	20.1911	28.9686	18.6661
45.2538	18.6828	36.4315	19.8002
29.1253	20.7484	32.3491	18.7404
53.3888	19.3054	38.83	22.5906
67.277	18.8749	34.7131	17.3946
26.058	17.4715	44.401	18.4644
41.5318	15.137	39.9841	20.2365
34.5309	14.1441	53.9262	39.6871
34.2232	13.38	43.3504	30.661
95.9426	12.9234	42.8916	19.0359
32.9334	14.3538	37.4478	18.145
30.6757	17.8983	31.4249	16.601
60.3208	15.645	52.9492	21.4847
45.5582	16.1145	27.3478	29.305
28.5144	13.0967	41.7276	42.6654
31.3569	12.321	36.8539	19.3507
38.3675	17.5588	75.8987	32.7094
50.4696	16.2101	52.5786	29.7159
35.831	14.4866	40.4019	19.9388
338.34	43.074	21.1297	24.7676
65.5087	15.3223	23.7469	20.9479
44.5793	16.5629	22.0703	26.3806
28.2983	17.3416	47.3983	27.6849
26.8091	15.747	28.6216	25.0417
36.7197	15.7882	24.2563	23.0815
23.1812	13.5193	25.8055	18.4308
29.0287	15.6959	30.5578	20.5587
36.688	91.0597	26.5497	21.1293
50.3455	17.3706	23.1202	29.8562
54.2449	18.1897	38.966	31.2645
19.2575	23.6733	21.9525	22.9274
25.1025	16.3016	53.6973	22.8298
27.0613	59.0434	40.3527	17.8539
25.2292	15.917	42.4114	27.1933
23.3403	16.2961	33.4429	24.332
20.7101	15.5184	29.455	20.6694
30.1072	28.1254	23.6752	23.0838
23.5045	17.4537	34.2693	35.7558
47.0117	16.0002	35.7979	18.6031
31.3555	18.1322	35.3667	22.8322
29.5867	17.3812	45.0484	18.8079
24.7951	16.4631	32.4375	20.2677
24.0476	16.1043	37.0146	56.5773
31.1572	15.0935	61.9027	23.6527
25.873	23.5558	30.8407	25.0596
47.8397	26.261	37.7591	29.8499
48.3891	41.4988	41.4834	55.506
31.5293	22.0274	50.8328	21.9931
28.3297	23.1001	36.9088	17.6298
31.3975	14.7082	338.957	20.2902
31.043	20.2041	34.0331	27.3181
35.9345	17.9723	33.8962	18.581
29.4076	32.216	52.0132	25.0256
35.5777	17.227	33.6308	18.496
40.2375	18.9034	35.8259	19.4875
30.1624	16.421	33.1331	19.8055
32.3094	15.9307	36.1254	27.0912
32.3481	17.9481	50.2674	26.9284
39.4588	19.2315	37.8314	63.5818
40.9028	17.6435	44.4909	25.1933
34.8262	17.7661	31.7797	20.301
42.0704	23.3297	43.8361	19.7003
45.3134	16.5921	47.591	25.2704
40.4077	19.7075	28.2144	21.9517
57.7129	21.588	41.9536	20.2104
53.3961	21.5914	36.984	28.802
49.8571	22.3321	43.1464	21.6337
96.9693	17.629	35.9357	34.2483
46.7741	17.0569	47.8137	32.0094
35.6726	29.6321	35.2791	61.6163
33.9306	19.2627	37.7253	26.9853
45.1506	16.3079	29.9023	16.3273
63.2821	19.1764	37.2363	17.6482
51.2273	40.5141	38.3943	14.2862
51.8013	23.4164	59.912	16.038
37.2102	24.7935	41.3062	13.2327
39.1208	21.378	40.9848	15.6384
38.1512	19.1345	53.4193	16.2557
44.6417	20.3001	40.1215	13.8079
39.9013	20.4464	50.4968	13.5903
35.224	21.114	40.5839	14.7539
48.4504	18.6241	66.8418	16.8739
42.1876	17.8289	37.6194	21.5228
50.4688	17.1785	44.487	22.4143
31.0098	30.9868	42.5678	16.7407
30.375	18.4445	50.9198	13.9853
28.8414	21.0851	39.7662	18.4901
32.8166	21.2833	39.0064	17.4624
41.7164	19.6586	48.66	14.3765
33.5645	19.9089	36.8823	18.5474
50.0227	31.1581	30.1261	41.7512
61.1145	21.6542	49.941	23.7136
55.1872	20.5114	42.2548	19.2766
38.8668	19.7406	70.3204	16.9062
35.478	18.1714	40.5255	35.3546
67.7655	34.5277	37.8845	18.2638
40.7211	19.8605	67.4606	28.0367
41.3787	23.8891	70.6846	22.5823
128.169	19.8824	44.0316	33.8999
30.2525	19.2249	47.9455	18.9741
46.4226	17.5959	34.1111	65.2899
139.413	23.5625	36.5135	26.132
60.0323	19.3658	45.5798	32.1716
27.0105	24.1091	48.2616	26.9828
40.3632	19.2204	37.8036	21.1411
56.8655	16.4546	40.9771	18.05
47.1641	24.4356	46.3267	17.8458
38.3828	27.3061	31.35	40.775
33.0373	21.3213	51.4689	26.1624
36.9324	20.4307	32.1483	32.2165
47.0088	20.9828	40.2693	19.5717
30.6613	26.7717	56.7159	20.2998
35.9419	19.1303	36.4973	24.7802
31.8515	17.8443	53.0204	25.9616
71.5777	19.4322	66.5267	19.0449
18.0423	20.6241	33.5286	52.475
20.5151	22.6164	48.5151	31.4193
25.5969	23.9916	31.5234	20.0453
23.4158	13.105	39.7143	22.0838
27.4671	15.7362	67.8589	21.8055
30.6236	13.1788	56.9411	23.6825
19.4275	14.2097	143.195	29.0602
36.3038	18.1209	34.8709	31.5755
24.2776	14.3202	48.3401	26.8311
33.6934	18.4535	26.8827	17.1199
19.5801	20.5413	50.7726	33.2265
35.832	19.7475	40.7378	23.7768
25.1093	19.1858	40.7475	27.3112
28.1823	19.8147	18.1947	26.475
23.4463	31.3238	25.216	23.3818
26.1429	14.2418	34.5388	61.6566
30.9532	18.2048	24.6334	18.4576
64.9606	15.5994	20.5719	25.7429
18.3586	21.4715	35.933	49.3232
26.7269	22.2417	21.4307	25.787
22.5799	15.1937	43.3395	19.5956
25.7017	22.3316	30.5174	19.044
32.6738	20.534	27.4875	40.8819
20.9996	16.046	21.9703	22.3206
25.7252	17.2358	37.4227	33.7545
20.435	19.3484	28.774	20.3059
23.859	17.828	40.8789	26.2218
24.8513	20.981	174.441	22.617
31.4761	26.2902	35.797	28.3549
30.9611	22.205	22.3831	48.3877
34.4935	21.2957	27.5832	21.7998
31.0237	15.0014	30.2889	36.8911
26.326	19.0116	25.3981	29.7008
25.9358	29.9741	32.6725	18.754
57.193	33.3093	32.214	24.4286
24.2928	139.299	36.1564	20.5912
26.1321	20.7032	31.4502	44.9318
26.162	29.0292	28.1371	28.6123
30.1066	17.1372	32.0147	21.5878
28.7567	14.4209	27.6297	26.1642
23.8133	15.8275	31.255	22.8343
35.1065	15.7075	25.5246	38.7753
29.4592	20.2122	37.6048	86.7462
31.5559	16.4051	25.7721	23.6152
31.5783	27.4636	31.6102	42.6591
50.4767	23.1883	30.274	23.4271
29.3259	25.1792	40.5513	22.8609
35.8448	26.6865	29.0188	21.6041
38.8589	27.3318	36.0934	30.5608
27.8513	19.2463	30.2701	21.6003
40.3987	17.6258	47.348	23.2247
24.347	15.7586	317.031	23.468
31.084	18.2687	27.4396	129.725
34.7136	25.4159	35.6013	27.0055
33.0225	24.8627	33.7342	22.2072
30.1105	16.8153	30.4082	120.452
30.7465	31.1978	28.4465	23.9528
29.3666	24.153	42.359	117.703
43.4015	22.0247	43.6959	22.4145
25.804	22.5475	35.7305	32.272
95.8625	18.5831	30.2928	20.1488
69.9158	183.686	45.1142	20.4297
45.4404	16.5431	26.3377	43.0446
30.1362	42.2957	30.5934	21.6876
29.4617	31.1131	26.4913	19.6175
27.091	22.1021	40.3432	36.4021
28.4083	38.4736	29.4864	18.9988
34.5343	18.2402	30.5342	26.1553
47.1785	20.4446	28.4674	102.092
35.669	33.4721	44.8102	17.8064
47.5602	18.7439	24.665	24.7869
35.88	30.134	25.8655	26.3103
32.9587	24.124	28.2246	16.889
27.3312	24.3647	42.2578	26.3868
37.7192	28.4576	26.7705	19.6118
32.225	21.9796	37.5751	22.9556
29.8383	22.7475	27.4959	27.4571
33.5111	28.3393	36.2325	19.7323
33.834	23.3983	26.0352	56.6322
35.7674	18.3325	31.9826	43.2318
35.0423	62.9833	82.0327	25.1202
30.7181	22.8437	28.9021	29.3326
35.8456	29.2351	31.91	22.1156
69.9063	29.2206	23.3658	20.9431
30.3453	77.0145	31.6544	90.7468
31.1819	24.9516	40.1565	19.3114
34.533	20.1769	36.7728	21.7292
27.9222	28.4033	35.1434	36.6455
64.3002	22.3223	43.4393	15.8533
73.6407	23.5943	42.2039	29.4334
29.4198	25.7379	35.8097	21.9429
30.0639	27.479	25.1025	20.4014
28.9889	25.5941	28.6763	18.0111
68.3704	25.1873	34.1365	18.1518
36.7432	21.9063	36.1013	23.2723
60.4443	22.2242	31.1806	22.1817
37.8539	29.7389	39.8569	20.7933
47.0022	25.8847	42.5143	25.637
276.443	22.7995	43.7663	15.4732
101.192	21.0066	56.0054	22.6011
48.4217	25.6114	39.8562	20.0736
35.4544	21.7738	44.596	25.3466
35.2983	22.5353	65.4596	29.2249
48.5937	20.3095	46.1177	19.8252
31.1023	18.2242	49.1216	17.3865
37.3372	25.6126	33.4531	35.6481
[truncated: 4,284 more rows]

## Sheet: Fig. 2d
empty DMSO	empty THZ1	sgRNA DMSO	sgRNA THZ1
29.7048	27.9963	33.8934	39.366
34.6093	24.3656	27.9289	25.2013
36.2976	22.7659	32.8176	28.549
35.4767	20.107	35.1351	33.5757
39.5492	22.2816	37.2821	30.0365
34.5022	26.0845	35.9339	28.1022
39.2845	28.5029	39.0415	29.8269
50.8234	21.8389	32.7347	46.3424
33.9855	25.0005	34.2889	31.4389
41.4749	22.0868	30.4138	31.1853
38.7828	31.0639	39.1888	29.3289
41.8336	24.4207	44.2552	27.9079
33.1128	23.1804	32.1448	28.5002
35.65	23.2082	34.6404	78.1205
47.9964	21.6271	31.1549	34.1011
36.351	29.871	34.6728	27.5475
36.3773	24.2586	35.2171	34.219
49.3699	32.0228	34.3715	29.6075
36.7052	30.3932	32.8236	32.9208
43.7649	25.5386	33.7211	28.5032
45.1297	27.4969	33.7589	31.1706
35.9494	25.8265	34.1863	30.3161
37.2901	22.3018	33.7135	28.5699
41.1703	20.3536	36.4533	26.1608
33.8039	32.8444	39.5639	25.8228
36.2416	28.7911	38.4396	26.8171
32.1142	26.7369	40.5532	25.4377
39.1376	23.8736	36.5941	32.0246
36.4822	25.0521	36.7047	29.339
40.7568	27.9762	39.9075	25.3781
37.8956	27.1725	32.0842	24.0861
42.1666	30.6055	36.0016	25.5594
39.2413	37.7567	36.9796	26.9311
31.1379	28.0153	38.644	27.6288
37.0662	27.5309	34.4626	27.4891
38.9938	28.8331	43.1907	28.2831
37.2045	26.5075	32.2928	23.893
41.5442	56.4898	35.8742	36.7646
42.4577	30.9362	38.9434	28.5278
42.5798	28.5934	42.7985	22.5507
42.8195	24.2789	56.3354	30.4612
42.1704	26.1991	38.5079	25.7057
40.901	30.4357	38.6519	24.0801
41.102	31.8348	42.7662	30.9572
38.5547	26.9731	39.2152	23.4012
43.2817	27.2392	59.4303	31.8919
37.833	31.2975	35.9912	23.0498
44.4346	30.2678	32.8746	26.0038
41.6928	27.9984	35.6037	26.1528
52.8714	25.3257	38.4189	23.0177
39.9448	30.1282	38.8387	26.0404
39.9971	26.7198	36.2056	33.3195
42.203	26.7035	47.1532	26.706
40.3024	22.8121	40.5834	29.3691
40.5249	26.4036	38.1339	24.9658
41.4438	27.0892	36.2432	22.4902
42.2302	33.1173	40.155	35.1511
35.9409	23.6564	37.9918	27.1441
36.6364	29.6875	36.7565	23.6951
40.4866	36.4694	37.4274	24.9227
37.1328	26.4459	33.5715	26.6621
41.9302	30.2021	35.9899	26.3451
43.7818	38.2063	36.2536	25.1539
37.6719	25.5965	38.4279	21.9409
43.3203	28.1654	42.4708	25.0439
44.6498	31.7787	42.7762	26.5051
39.0038	26.1943	41.2354	23.3021
41.3604	32.6801	44.758	23.4485
34.4636	23.6208	34.9884	25.0959
41.2735	35.2069	36.342	21.9995
37.1272	40.3887	34.3774	30.0574
47.9347	33.1472	38.5031	23.0824
41.1499	26.3451	35.9059	22.0785
34.0407	27.3239	40.006	34.4477
44.4865	39.7027	39.0635	25.7313
46.6992	26.2585	39.4105	23.4034
45.532	25.559	37.7727	36.35
41.2598	30.1952	50.5323	23.6096
37.973	31.635	34.2508	22.92
38.1215	22.4972	39.5106	27.2584
41.6654	25.2128	36.0897	23.3335
40.8413	27.1696	33.5353	25.2824
41.285	28.6422	42.259	23.8005
44.191	28.32	34.8978	23.768
40.1964	26.6157	38.6755	27.8739
41.5315	27.486	34.1297	24.0714
40.0055	27.3619	37.0243	25.7084
43.5268	23.9912	37.4986	25.9533
36.8383	27.5238	33.8767	26.7443
42.2728	33.0636	38.211	24.9921
45.3321	33.9696	40.9016	24.128
40.7085	25.5833	33.7896	24.4307
42.5524	29.2771	41.1829	28.9469
32.191	27.1665	27.0745	26.3593
40.1662	24.5955	30.9918	23.4905
37.8737	25.473	42.6697	31.2271
41.5217	29.4318	45.1236	25.7891
79.6281	22.1344	42.7767	29.0135
39.797	25.3135	43.0398	25.1098
38.2723	25.245	38.2076	25.637
33.9235	26.7773	40.0735	26.8746
39.553	25.7437	37.2377	28.9793
40.1698	23.2726	42.7177	24.5525
41.9455	24.2842	39.4603	25.3429
101.136	26.0881	38.6069	29.6173
34.7687	32.2209	39.7939	31.026
35.7141	26.4781	35.2511	30.7368
36.1357	24.781	49.5236	23.044
39.4709	21.608	39.2871	23.8774
40.921	22.001	36.0568	23.2394
34.4375	27.9555	35.5583	25.7178
47.405	30.3076	34.2283	88.9256
39.972	34.152	40.4187	31.091
43.2418	25.5471	37.2239	26.0868
36.536	24.2025	38.9229	24.2103
34.6519	20.204	29.0821	23.3881
33.4351	24.1988	32.9539	24.3078
59.1854	22.0915	39.2411	22.8795
33.5163	20.4949	36.8338	23.8919
34.2076	20.7313	40.1685	24.3675
37.7304	20.9413	34.0784	24.3777
34.0525	21.529	45.0945	34.8208
36.6189	24.5334	39.9621	22.756
36.3703	26.9434	30.6377	25.476
38.0327	22.3207	38.7157	23.7707
40.4174	20.0195	33.1122	22.9041
37.5265	23.7721	37.4067	30.285
38.3869	20.845	31.5644	20.8153
38.4752	22.9274	32.8765	23.08
35.6288	23.5555	33.2671	21.001
40.4876	21.7228	33.5238	38.7876
37.1744	28.63	31.4322	29.9519
34.9351	24.1127	35.6439	24.6743
31.7726	26.3966	33.8094	20.7259
36.2695	24.9658	61.7141	66.3592
41.1555	23.5403	28.8619	21.9148
33.8695	21.5682	36.3385	20.7153
43.8283	27.5381	35.8959	24.6299
28.9602	21.045	52.0036	20.662
34.4369	35.7267	30.2415	22.299
32.8452	41.4665	32.4589	21.9253
34.1009	22.6268	34.6276	27.4095
33.4273	26.3849	34.2039	26.7589
33.5842	22.1097	37.0439	24.317
38.3661	28.9806	34.0684	65.8522
23.3084	20.0684	31.8273	20.0356
37.1423	29.1443	33.3965	25.7242
31.8913	24.6321	32.0815	20.5389
34.5129	38.6465	32.1197	28.7708
32.9737	36.0139	35.5743	23.6718
28.6811	27.1832	35.2981	22.7876
35.9048	25.1916	34.7634	23.2566
23.8666	21.3669	30.1138	26.9897
39.8189	22.1666	32.4138	30.4983
36.9695	25.896	33.555	20.4055
34.5935	22.375	32.968	26.2118
39.6724	27.3448	37.6114	27.9697
38.0418	22.8344	35.9438	33.0326
34.6136	53.6586	34.0545	19.9728
39.4883	29.5537	41.3371	24.2201
30.8663	22.7311	34.3077	21.2867
43.522	51.6918	34.4612	24.6217
34.6176	22.8666	37.1972	22.2736
35.7561	23.5756	36.1224	33.6912
33.3651	67.8337	35.9711	24.6375
34.2832	32.9439	39.3637	21.5041
31.1698	27.9662	27.6579	25.2964
34.8939	22.4542	41.8582	24.2398
28.3536	22.6265	52.5125	25.5642
33.6053	25.8032	34.5722	25.5066
32.9334	29.3967	38.9755	31.0718
35.8857	24.0229	47.3417	24.8272
42.4064	23.5512	40.6564	22.59
31.174	21.9425	49.116	23.3966
39.5051	25.596	39.2897	21.8242
34.8051	23.2835	37.2192	24.0099
40.5664	21.3322	35.7851	28.1126
36.6662	32.3551	49.3788	24.4995
37.148	22.0768	35.4718	21.8049
37.2527	26.9096	37.9006	24.774
36.4084	27.6729	32.8948	29.8405
58.0657	21.9649	36.0763	27.8917
43.2547	24.9691	41.9251	25.3466
41.0322	28.4015	40.8273	22.5472
37.0156	21.9751	35.9146	23.8259
35.5722	27.2806	34.441	25.3408
48.4213	23.8068	35.4663	31.0255
45.5664	20.4135	35.6531	28.5138
38.9344	25.4625	43.6088	25.4597
36.1439	26.5006	36.0588	26.3801
42.7866	21.7645	42.2619	26.8992
43.4049	19.8618	43.0401	24.2066
34.6846	20.288	38.0865	21.4125
40.14	20.7776	39.4373	24.7988
31.9124	27.9324	37.3124	53.7428
30.387	75.3349	40.2655	23.9009
37.0377	24.9028	41.1166	23.963
34.3683	24.7344	36.182	30.4
37.6947	21.2596	39.1752	21.9366
36.7425	22.0975	39.9784	24.596
35.3385	25.1954	46.3834	27.6891
38.4667	30.1542	46.2548	23.6424
45.3726	32.0702	37.8835	23.1388
33.3774	21.6581	43.077	31.3957
37.8764	35.5028	34.8126	21.8998
37.8855	21.3479	45.6464	28.6324
38.3873	21.1115	39.0805	26.0115
45.4217	28.7226	47.7117	22.4183
37.8542	20.3702	46.2772	23.5723
43.9961	34.0042	43.6876	21.8087
42.4352	21.6715	39.0001	24.0892
32.9134	20.583	41.9509	24.6457
51.3958	36.191	39.4917	24.4425
41.5223	27.4816	40.3914	24.0918
37.0161	25.5303	43.7382	25.866
33.7474	23.5555	37.1253	24.5025
35.7728	59.6897	44.3461	27.1137
37.0748	28.6836	42.0395	24.2959
43.3551	27.2148	38.1267	21.5646
32.4104	24.0862	35.3311	20.6349
39.5287	25.5911	38.8044	23.7903
33.9555	33.3397	38.7557	28.3934
34.4347	21.1038	32.8091	22.6574
39.7456	26.953	35.5536	27.3106
39.7792	20.8239	53.481	24.6654
43.5557	22.9596	40.0845	48.5254
45.743	20.4519	53.5191	24.2573
41.8594	24.1132	37.6801	24.985
33.1912	18.3125	39.1578	32.1327
40.3795	22.3757	38.2914	26.7535
36.6163	23.2839	37.804	24.9289
39.8603	21.8902	40.9871	22.9434
37.4353	22.157	48.9828	27.3583
35.949	25.948	43.3821	24.691
41.6512	22.4895	41.7939	25.9531
36.0594	18.6405	36.9883	29.741
41.4441	22.7215	43.1582	28.0191
47.5514	20.5186	34.016	24.2497
34.9031	21.0476	36.8345	23.6303
45.4038	19.6336	34.3414	29.3489
39.9871	20.5162	40.847	27.0782
39.555	20.602	32.3476	23.6708
37.588	25.9166	38.102	25.6546
43.73	21.5763	37.4039	27.1157
37.784	32.3813	38.6346	43.3426
50.5248	22.9085	46.8842	25.3988
43.0223	25.8369	35.8778	26.7939
40.3652	30.3593	44.3254	25.2594
35.7551	20.6141	41.0593	32.0159
34.7198	23.6731	39.4763	24.954
39.0961	20.4141	33.984	28.5251
43.9271	19.1875	37.3232	27.0429
30.9676	20.6421	37.2534	25.4555
32.1428	20.0413	35.1578	23.3372
45.2209	38.7801	33.98	27.5733
37.9408	20.7707	33.9356	26.6707
41.5327	22.854	38.3799	24.6231
44.5779	24.1309	42.2169	24.7572
38.8282	18.7328	34.8077	25.4617
36.2068	20.3539	33.8868	27.8963
44.6783	23.6314	30.5875	27.1327
49.2648	25.1729	39.6537	32.3957
36.0616	43.2062	35.8253	22.7048
39.0834	20.138	45.2312	25.1529
32.5559	24.7102	37.6322	23.9987
35.7167	23.6231	34.7838	25.2305
41.7907	29.589	34.0113	29.8246
40.0269	31.9201	32.9036	25.6547
42.3653	23.2758	31.4838	26.2403
35.547	21.17	36.9898	26.8078
38.0565	33.8362	38.4963	29.0708
43.4322	22.9306	38.1865	24.029
36.3422	23.3087	38.9864	27.4082
37.0287	37.7067	32.3919	32.9811
34.6426	25.4954	35.4757	26.6533
35.0915	26.7804	38.7087	31.5285
61.2056	22.547	32.5689	33.1198
33.8997	23.8083	31.6766	29.0961
39.0431	39.5696	28.1561	25.6626
39.1761	23.661	30.0417	26.4714
36.6054	24.2312	29.8521	30.3969
33.8741	58.9877	33.426	29.0157
39.5032	26.3608	33.0213	33.5058
33.2939	35.6633	28.4566	24.8319
40.3195	27.7717	34.2902	32.7227
38.7473	25.979	35.7817	28.0782
33.12	28.2754	35.0088	22.3432
41.5438	50.9606	31.0304	26.6482
36.7031	36.5463	32.551	29.2406
36.6052	33.4671	33.5862	28.1671
34.0409	38.0097	30.5075	24.1167
35.4464	25.5116	34.7576	39.3452
37.9059	26.2461	34.0791	29.347
32.5794	26.4869	29.676	22.7643
34.9097	36.0912	27.6179	22.854
36.7243	33.9403	41.3898	26.7218
33.5937	24.3564	34.0738	24.7276
30.0104	23.9964	33.5276	30.5275
38.6105	35.072	64.5669	26.9032
32.3662	23.5473	66.6126	23.8181
53.6545	27.8011	32.5774	41.0093
32.658	20.7015	33.7496	27.7193
38.6148	27.6082	33.6576	28.2789
39.6314	25.0593	47.7742	26.5158
37.4735	22.2867	45.248	39.7066
38.6185	28.5744	29.9482	25.0912
41.2406	48.8298	30.0659	27.423
30.903	30.4029	35.2848	56.5051
41.2587	23.7584	30.291	23.2964
36.4104	38.0485	32.9239	23.4526
37.2691	28.318	36.6172	23.0832
36.8666	32.795	36.3964	32.6683
31.6619	26.4554	35.0478	29.9631
36.8509	26.7878	42.0118	23.3605
34.9313	21.6529	40.3353	25.7935
46.2962	30.737	37.9014	32.2483
40.1789	26.1174	47.4029	24.3119
35.8909	19.7889	39.233	23.1643
38.7472	27.9791	40.1546	21.661
36.1625	20.2144	35.6139	31.8651
34.6516	20.3013	34.6925	28.5081
31.2507	33.5357	32.0702	28.3643
31.8932	25.9846	50.0389	28.9125
32.8843	26.5316	34.4085	25.1421
35.2808	25.7757	37.7321	22.2686
38.8438	23.3258	38.2929	22.3502
34.4494	25.4207	34.1471	22.5092
34.6678	23.9567	38.4715	23.3868
35.1902	22.1852	38.6201	21.5595
39.7181	25.5131	38.883	21.6157
34.0804	27.5721	42.6225	27.9404
35.2423	36.9457	34.6837	47.7437
33.5655	24.7424	23.6444	25.2655
34.7691	22.8424	38.0214	22.7352
36.6079	28.2528	34.9101	29.0833
44.0772	27.1301	37.3487	29.4508
34.2874	28.1712	36.0107	36.8666
30.6567	24.3907	32.1955	27.0153
36.3562	30.5402	47.4493	24.8953
54.5733	22.07	32.1433	24.4803
40.5878	25.0997	36.8108	24.8434
31.1408	18.0267	31.3835	24.2377
34.7771	20.3929	38.4028	42.4865
37.5862	22.8177	40.3109	24.5955
35.9212	21.9062	33.7301	27.3462
32.2057	23.8914	33.9515	24.4476
35.5497	19.0425	40.2339	25.7445
36.1384	19.1848	35.1572	27.7103
37.1256	22.7977	45.2153	34.0594
34.6166	17.1192	36.1086	23.6571
35.2168	27.0211	37.8432	26.5454
40.9635	24.7907	32.7231	41.1192
31.3602	24.1235	38.9439	28.3492
36.2804	30.8257	37.4891	22.9275
35.4826	19.6986	37.9379	31.6966
39.2282	20.6762	35.6278	25.6816
37.503	40.3065	38.5057	25.709
35.5227	31.7772	36.9027	23.9048
30.3451	23.9637	43.032	23.5845
36.326	19.8683	37.4543	22.8284
39.1687	24.9422	33.3191	26.8117
37.4557	26.3347	42.9717	33.3323
33.5026	24.29	37.2807	24.9762
36.3324	25.543	41.7886	24.3799
30.095	29.1688	38.931	28.8752
32.3029	31.0085	37.8767	22.2251
40.0885	21.9755	42.2562	22.0843
38.6247	27.7239	37.741	24.3766
31.7472	23.5438	36.8286	26.5447
42.5768	36.2981	38.4387	22.5243
48.9364	28.1969	40.9053	23.6728
39.1189	19.8375	32.6718	24.2013
36.108	23.1535	35.4831	22.3497
36.6179	23.3638	30.7947	31.2997
38.8652	25.3759	34.6633	23.5543
33.495	20.7104	29.7003	33.6019
44.6508	26.9631	33.2891	51.113
32.1688	29.7667	64.4579	21.9071
42.5949	33.3885	39.83	27.5965
33.1109	23.1538	34.7974	27.8097
40.0895	22.6726	65.083	21.9673
39.4573	21.3188	44.696	25.8018
43.8247	30.0518	30.9028	23.606
41.0934	28.8768	36.2716	22.1815
36.2742	24.2167	54.0288	30.4616
37.7715	21.945	35.4025	45.6648
44.1211	22.3579	33.5836	27.8253
42.7636	25.616	29.7836	20.9017
35.7762	26.1736	29.5056	19.7756
34.4487	26.3572	31.2733	31.0316
44.4411	27.4109	31.3912	27.881
35.267	24.0967	37.0755	73.1531
39.6562	25.6397	29.6949	25.3164
38.6857	46.5879	32.9717	22.6339
39.3288	27.1129	33.4492	22.0656
31.9885	29.6928	34.8797	29.1962
30.5251	26.9513	34.429	49.2102
47.8364	33.2613	40.3333	21.6962
40.7782	52.4606	27.5014	29.1642
32.9382	24.4007	26.8683	32.9443
34.2257	29.0934	27.3171	27.3256
32.6334	45.7198	35.0228	22.2656
40.0411	27.0918	30.3102	23.9902
37.9745	28.8044	30.8458	25.6886
42.8099	23.085	40.4383	43.8724
40.3806	23.6534	35.825	27.6838
55.2069	23.5995	35.1915	57.4408
34.529	32.863	34.9761	26.7726
41.3081	35.0658	36.1385	26.7147
31.1357	21.0475	31.5462	28.2102
35.8793	23.3071	32.9193	30.0092
32.3027	54.5545	31.135	30.0942
33.9276	48.225	47.0483	53.3571
31.4174	26.2948	35.6628	24.5841
32.1395	23.1622	38.5954	24.6518
33.666	30.6998	38.5479	24.8471
35.1181	23.4173	31.5157	27.8905
37.2966	29.0167	35.9438	34.5017
30.36	25.1028	36.6499	23.3157
35.0127	25.4812	36.0667	34.5545
30.7884	24.7717	40.6419	25.1524
30.2442	24.8618	41.4013	30.7137
31.5448	23.8949	32.6173	30.8899
31.5157	22.4415	39.6712	26.4734
32.4141	31.0965	38.1234	26.7767
38.5318	25.4223	28.8636	28.8982
32.7051	23.9758	37.1544	31.2064
43.419	31.737	43.8592	65.1922
34.0314	23.7024	39.678	32.3844
28.2728	22.3933	36.1613	34.7423
33.6842	21.5297	36.3908	29.2137
27.1453	18.9481	35.1861	32.2219
42.9385	23.8459	41.7007	30.2368
34.3972	22.837	40.8785	31.7652
29.63	22.3604	36.1093	28.6928
30.1066	22.4206	36.6276	29.256
35.397	24.9133	32.3095	23.4441
33.1081	24.8262	39.2669	28.6731
34.9396	24.1523	37.7294	26.2008
27.0905	25.4167	35.7015	32.188
40.8428	21.7276	33.0466	24.6628
34.1975	22.47	37.9499	35.7042
32.0083	20.7254	35.0669	34.6102
33.1287	20.0852	38.9473	26.1361
33.0705	19.6559	32.8286	28.2331
33.4249	20.4262	30.147	26.7482
32.0758	21.0037	34.7641	28.1974
30.8604	24.7693	33.6047	27.8469
33.563	22.9533	41.0946	26.3404
28.5404	20.5862	35.9774	24.012
38.8625	21.831	28.826	24.6191
40.9105	21.9233	34.2804	22.3928
33.6465	20.83	37.782	27.3138
33.9954	23.0629	33.0546	31.3685
32.9113	18.9461	33.5624	25.0257
31.862	20.3124	38.8527	24.3685
29.9816	22.1141	43.0991	22.5093
42.3563	22.3975	37.7557	25.309
33.1573	21.5517	38.9074	21.665
31.4404	22.2798	36.3195	21.9492
31.145	21.4166	38.3366	23.7504
29.5913	26.655	36.1292	23.9962
34.9925	21.626	31.6035	24.551
31.436	20.4358	34.9852	24.6522
33.942	28.0933	37.0855	43.8386
37.886	31.1383	33.121	24.2619
34.6009	21.4619	38.151	30.1105
32.8093	22.2592	38.06	24.0188
34.4653	25.4617	34.1797	26.402
37.714	34.8233	40.4757	30.2018
32.207	26.4725	39.375	22.3942
30.2498	22.5486	34.6728	25.6522
37.8031	22.5751	33.6696	24.7739
38.6142	23.8226	34.7724	26.7119
36.5262	26.8546	32.4902	27.076
32.4325	21.1363	40.3896	26.5651
32.7076	22.1077	40.5914	26.1148
33.4866	23.7677	34.9069	26.4081
31.0217	29.6847	32.1094	25.2002
32.7712	23.663	38.222	28.8579
34.6981	27.3738	35.314	29.5425
28.7804	30.6641	37.1343	28.2511
39.4518	32.1372	33.875	31.9657
37.669	25.8436	38.5976	30.6629
38.5005	27.9895	35.5365	25.5538
34.3767	27.1947	37.1177	28.8242
38.5674	23.7374	38.8457	28.6765
35.4484	92.2629	35.0775	34.9647
39.6469	21.063	34.137	25.5741
37.2158	29.2215	30.7053	24.0285
41.8315	23.602	31.4382	29.0025
37.3717	36.1133	37.298	29.3344
35.6933	24.7871	25.7816	45.1689
39.2002	25.6473	35.9577	33.2527
32.8385	25.8291	33.5672	27.9133
68.1308	25.5878	35.874	25.8705
39.057	18.5369	34.259	27.8194
36.1842	23.8581	34.9824	29.8525
43.8301	24.3608	37.3506	30.4261
36.2949	27.3213	31.704	26.7781
41.3916	24.7682	33.2579	33.0024
35.0718	25.8683	31.2865	27.3459
41.2391	35.8604	27.7723	26.9427
34.2303	41.4753	27.0127	29.0662
54.8083	25.0356	39.7729	30.5619
39.1025	31.2949	27.2706	29.3112
36.6114	25.6297	30.5719	27.5497
38.0321	31.2802	37.2152	25.756
35.0858	41.6846	33.4905	45.254
41.9065	27.0811	30.8588	38.0185
39.7922	27.5901	34.74	29.3548
33.2781	25.0143	50.6272	72.7389
36.1941	23.7548	35.2437	33.2064
33.6978	23.5378	32.5951	25.9789
51.3745	29.1463	32.8505	28.4419
37.2799	20.3306	35.2948	28.8529
33.6995	22.2909	30.1192	32.892
38.1337	27.9206	31.5134	29.6124
36.4768	26.722	43.411	27.5692
47.3336	20.374	35.7759	33.9577
36.9175	37.0458	39.1776	30.3778
44.3976	26.477	35.2254	56.2188
47.6026	33.6978	40.2755	27.6685
45.1453	22.4229	48.6887	26.6171
35.2261	26.433	41.1676	44.3384
40.7884	29.8593	39.2855	31.4789
44.3472	24.5271	40.3462	22.4184
38.5321	22.1478	36.9915	29.552
41.8108	25.2881	42.5346	39.1965
38.5483	20.348	34.0892	24.7398
31.7158	31.1482	31.2335	25.5177
36.5008	25.0718	34.5794	31.7591
39.0404	27.639	35.5247	33.0132
54.9419	29.2288	39.3756	25.3534
34.4969	23.3452	40.3882	27.3921
47.0624	39.0565	36.7865	24.3459
38.2121	25.1408	34.1744	28.4355
38.7294	20.0244	32.9809	43.9064
43.9225	23.5305	38.7249	29.73
42.0655	24.918	34.95	29.6792
36.2287	25.5509	34.9563	31.3302
55.5951	38.7833	40.6046	25.8293
40.6722	24.4336	32.6447	30.4621
40.0983	20.7598	33.3575	32.6048
34.5116	19.8607	39.9766	25.8983
121.001	28.3726	41.1644	90.9348
33.9869	21.0523	33.4471	37.104
34.0017	22.6015	36.4261	29.0159
37.7229	24.6056	41.315	56.6703
44.6061	22.3939	44.6709	26.4508
33.2342	21.7128	36.6769	25.7762
36.7321	22.6137	33.9146	20.7378
32.2814	32.268	41.5676	26.1239
43.6321	40.9079	37.9993	24.0595
37.1836	24.7246	36.2832	23.0849
35.6037	23.8127	37.4625	29.1205
35.3287	26.7682	32.5349	28.3818
36.6078	25.7713	40.129	28.311
33.0937	28.0948	43.0228	28.6696
34.5886	22.4823	31.365	35.8572
34.5992	22.5119	32.8465	28.2093
36.4498	19.411	34.051	23.5436
36.0398	30.2435	28.6487	26.3477
38.0488	22.6838	35.9857	23.5925
33.3454	21.6286	32.509	23.6786
34.9024	27.6634	36.3244	23.0629
33.0354	25.1583	32.1609	24.1678
32.8398	25.2719	37.3569	26.0639
36.7567	26.0565	30.7619	24
30.8814	27.8571	41.8172	27.9295
36.9499	26.3282	31.0146	25.9699
35.9047	23.2249	31.918	27.1748
33.9093	28.7854	29.6663	28.6735
31.3429	29.8725	36.4239	24.6745
30.5582	24.5202	31.9017	29.4597
33.1545	28.4866	38.2261	24.2651
33.0466	26.5727	32.649	27.4658
29.3341	23.555	31.0858	28.5161
30.5591	23.4964	28.0939	26.147
25.3037	26.2463	30.4555	26.6586
33.7451	24.7897	33.9598	28.5998
25.8248	24.5559	31.1364	26.449
30.3863	27.4977	30.6258	23.531
36.0589	25.6624	39.8387	27.7445
33.0644	31.1479	33.7057	29.5145
46.5267	24.4225	37.4994	28.8825
37.8698	25.5788	34.5899	23.5699
39.6995	25.2552	77.4515	24.4071
36.1094	29.3476	35.9729	35.3888
61.766	28.9369	37.8726	26.4587
33.8174	30.5437	29.6298	23.9736
39.7847	43.1032	32.2654	27.1167
76.6802	28.9399	23.2853	28.3455
57.0506	32.046	37.7408	22.943
41.0968	31.8664	30.9242	32.7505
32.3653	29.9384	43.2241	27.1055
47.8978	25.4344	39.9611	31.4364
36.606	24.8273	43.615	25.1339
40.5729	27.8893	30.8453	23.7233
37.5468	34.9619	35.8273	27.9594
35.3968	23.7242	35.0929	31.5223
41.7654	22.1341	38.3308	26.7078
39.607	24.3476	42.4779	27.1816
35.8427	44.4666	34.6304	25.4917
44.7209	26.0462	34.4512	35.8594
35.2038	19.6054	40.1116	36.0335
31.7586	18.3531	38.1381	24.2973
40.0957	24.2795	45.9953	26.6411
51.5388	23.2856	35.8343	28.1187
28.5173	24.4014	35.516	33.0352
54.3643	26.5591	34.9929	27.1441
49.2583	21.484	30.5825	26.0009
42.2689	41.8851	36.1955	28.55
41.5594	26.1122	36.7079	28.026
39.8317	27.1357	44.4898	28.3633
38.2202	26.9948	40.3315	23.2873
31.0405	27.9546	43.937	24.7703
36.1125	25.3653	41.0733	30.8666
35.0061	28.4976	38.1898	29.9043
35.3057	25.7332	36.7692	25.4596
41.1918	22.5875	39.013	26.0989
43.2516	24.9795	38.5219	33.7651
31.8795	24.8092	38.492	32.1418
46.3124	27.3696	37.4382	25.4703
34.4538	30.6394	36.2884	29.2531
46.5796	22.2635	38.635	29.7944
43.5954	21.0401	34.4044	29.5213
40.9415	23.3756	39.9189	25.2397
33.3734	25.2896	39.2302	26.5648
37.5399	28.1824	43.6761	23.4995
45.2807	25.4537	37.3629	25.9405
39.0935	22.8324	36.5963	36.5596
52.9262	25.9643	43.0011	27.4312
37.004	29.5291	51.665	30.4801
44.8191	30.4199	27.7363	26.0708
40.7212	26.2981	36.0759	23.9296
42.4702	25.3824	37.6113	28.4497
37.2523	23.6289	35.403	28.5478
49.1335	25.4616	42.4424	23.9746
43.3959	20.0933	38.3371	23.7108
36.6412	22.3549	37.0426	27.6258
40.8384	21.2332	33.8135	30.4829
43.4713	24.3303	33.8235	27.4566
36.8026	24.9973	36.708	22.5571
40.483	32.3307	37.4313	31.218
36.9425	27.4471	35.5691	26.3452
42.5646	25.0592	40.7548	30.3336
42.2628	22.3982	32.6829	37.577
51.775	62.966	42.1563	27.8386
47.492	24.4473	35.8617	23.6191
40.8177	20.7479	31.0984	25.499
39.255	19.9812	34.2336	25.0967
35.5397	20.7616	37.173	25.6513
38.3547	18.986	40.6107	25.5995
49.3485	18.1961	36.7685	25.6646
43.1662	22.2469	39.9734	25.8833
42.737	20.9557	36.3657	23.806
43.3927	23.4451	38.0484	23.5148
40.2651	21.1913	37.2657	26.8656
45.2988	48.2779	33.0321	19.9561
43.6853	41.0939	33.516	22.0303
40.967	25.8072	35.4927	29.393
34.35	27.1397	35.0802	21.5284
40.0738	25.9992	38.4873	25.6327
44.3447	24.9489	34.5599	26.264
45.5365	27.621	43.2731	25.5931
42.8476	28.4364	37.2433	21.9364
46.4114	25.4815	35.5783	23.2003
49.54	23.0305	23.4408	24.5889
46.1037	25.8424	31.664	27.4024
40.8367	26.8543	29.8263	25.3532
39.1065	26.469	28.2619	25.5472
35.879	30.9305	23.0494	24.4458
44.3029	26.4324	27.172	21.0667
47.2964	27.152	29.5883	23.2614
45.3678	29.6766	31.4727	22.7169
34.4461	29.1425	27.6741	24.4321
59.9889	24.4744	42.0691	24.4343
44.4922	28.2654	30.1889	25.7838
46.099	32.2054	35.094	21.8769
42.2073	25.3876	29.7862	58.929
36.1639	26.7753	33.1417	26.0253
37.2081	30.4106	32.1082	24.0388
42.6937	37.9063	31.7112	27.6248
56.6618	25.484	33.3415	23.6662
39.6176	26.2246	35.8418	24.6196
40.1536	26.5389	32.7824	25.3034
44.4855	25.3296	40.6998	27.1911
35.8411	27.4021	36.5442	23.7018
39.2865	29.0818	35.6873	25.0126
35.5669	43.578	32.7875	26.4064
34.083	26.9701	26.3441	27.3407
38.8189	23.775	37.0875	23.686
32.5934	27.2258	32.1164	22.9389
44.8707	25.5581	32.6236	28.9482
40.2683	32.384	33.11	27.8779
35.5581	28.4017	38.8346	24.9858
39.7662	27.7968	34.7256	31.4946
45.4712	33.0574	40.6505	26.1037
34.1419	44.7921	38.3231	23.3259
42.4085	24.97	38.1449	29.8154
32.9881	31.5598	32.2451	23.7966
29.5754	30.5033	33.3877	29.3334
39.041	27.5461	38.0792	33.4102
38.8658	24.1553	42.7028	26.8799
39.4183	31.4226	37.4334	27.8198
39.2952	26.0606	31.7953	27.8978
39.5545	31.2144	34.6302	27.2383
40.3085	25.5887	24.2012	23.8014
35.9846	24.9722	33.8253	27.6907
33.7962	26.9932	32.7569	32.7585
40.3739	24.6151	35.4994	24.7938
37.081	27.3874	39.7176	31.7967
38.2488	34.7228	39.7779	22.3417
38.7871	25.0331	50.8312	24.1759
39.6601	21.754	41.739	24.8068
35.6559	28.1944	33.5868	28.1404
39.2273	26.0235	36.491	26.5624
39.1379	27.1468	40.2741	30.4037
37.4856	24.4255	34.9805	37.8315
37.4119	22.4597	35.4628	33.9627
40.1229	39.4584	38.9057	26.243
36.0395	23.252	40.8957	25.4693
36.8083	23.4604	36.1694	27.1129
36.1609	26.2548	35.3595	28.0141
42.6985	26.7308	39.3955	26.7696
41.2844	21.445	35.7405	25.9343
41.8398	33.9682	38.1992	28.0838
56.3108	29.0805	36.5867	26.6577
36.7087	25.0632	39.3277	28.5819
37.9199	18.9627	35.8732	27.6889
34.0089	23.6848	37.7366	25.8911
36.3988	21.9165	41.6075	29.3333
42.4476	20.2024	37.5445	23.909
40.8427	21.3858	45.1922	30.2394
37.3328	23.7056	37.3574	24.8699
38.8	30.6411	29.3205	25.2944
45.021	27.6597	38.3623	23.4152
44.99	23.8592	33.5506	21.6502
33.1146	20.899	34.8942	23.4581
33.7184	23.1419	26.0874	22.0998
35.8986	23.1822	28.0985	23.5993
33.3722	21.5306	37.8175	30.6751
36.8092	24.4237	37.7077	25.6561
52.2386	60.8008	30.7396	24.3661
29.0162	22.282	37.6848	26.5838
32.8367	21.2224	35.3177	27.4712
40.9272	26.367	26.1669	25.9759
41.8505	26.8177	33.2452	23.3943
40.4342	23.1575	32.033	28.477
38.0469	21.6472	33.1051	33.4324
32.9189	23.287	31.4111	28.2012
30.9918	28.8252	36.0834	22.966
39.016	23.2385	32.9229	27.8899
27.3746	33.7904	27.1942	30.296
29.6922	25.7064	35.7217	31.5935
37.494	23.9218	34.9231	29.6887
49.4008	27.2029	31.1683	24.7096
37.813	24.6495	23.7853	29.5557
47.9671	25.177	36.7031	26.4576
47.4984	25.2291	29.7015	30.6052
31.4656	25.5669	33.2269	25.4065
37.2727	22.0177	28.364	27.499
30.0114	25.8793	42.1317	30.1798
37.2388	29.7652	32.7853	33.1535
37.1315	30.2157	34.3878	24.8336
41.2696	25.6437	31.9036	23.7018
33.8961	26.6247	31.4971	27.6581
39.7522	24.7549	36.3918	26.6027
38.9812	41.4809	28.9441	28.3031
41.1986	26.4069	36.8356	36.6372
36.5367	21.855	34.3861	25.2757
30.3089	23.3241	34.4773	28.5247
51.0652	23.1538	34.6484	28.7862
43.1416	23.1454	37.045	31.1341
38.4087	25.4998	36.3746	25.9918
32.3487	26.6819	34.8803	33.6984
41.0199	26.2204	39.9134	30.3106
28.7607	25.2339	44.7224	27.3118
38.4934	23.566	41.4135	27.4517
38.0702	26.5078	38.0427	23.8076
34.4979	25.1492	36.5842	25.157
43.2059	28.0931	38.85	37.1297
42.0516	23.3795	39.4273	34.3381
58.8558	25.1043	38.0378	31.2526
31.0591	35.4352	31.5573	27.6908
30.7451	26.3179	34.2748	30.022
36.5672	25.5343	31.792	26.0439
38.5344	24.3087	37.5598	27.0279
35.3385	26.0651	34.7618	28.466
41.5154	22.4003	40.1893	29.988
34.796	21.8656	39.0857	25.2851
32.7947	31.2622	34.1839	26.6847
38.1312	24.8436	34.9188	45.9709
33.9379	20.8632	36.2027	32.2944
37.7607	23.7107	43.7697	25.3281
44.6855	26.9816	34.5895	49.6659
33.812	26.5918	38.2902	28.9025
47.185	28.1215	38.3322	29.3462
40.0399	24.3479	38.6139	22.8472
35.8907	26.2978	34.5736	27.3573
37.2158	37.7019	40.8747	28.1353
43.0523	28.1146	32.9516	25.5257
35.4562	23.7008	34.7438	24.6104
43.2364	28.9213	39.6581	21.4541
49.847	24.6063	37.1236	31.725
45.6055	23.8525	34.641	25.9885
40.4022	21.6234	40.7707	23.1379
42.2151	32.0918	37.0426	25.0831
41.9017	26.0673	47.1185	33.3259
44.5654	26.613	28.9826	29.5574
51.0289	24.672	43.607	30.8431
36.0501	22.6884	40.028	22.0493
42.404	25.3865	33.8844	30.9061
38.6146	30.8901	38.4014	91.3691
38.0876	20.1	44.5763	25.5882
35.1774	24.9347	32.4506	35.7593
48.0011	22.9541	42.9585	71.8671
40.0727	25.0405	37.9893	34.2234
41.7275	22.5707	32.5201	20.7225
37.1719	24.5969	59.5418	22.9035
41.9597	30.3194	42.158	23.6017
38.7281	27.3098	35.3775	22.5371
39.7344	34.1672	31.5775	21.6817
41.6942	24.7724	34.933	24.7656
39.9291	21.6558	44.7716	32.4732
45.0885	26.5395	37.7085	23.7832
42.5855	29.8031	48.2018	24.7763
41.8575	25.654	47.9582	22.3898
39.6217	24.5119	38.887	25.0954
35.1583	32.3632	42.3429	24.8695
38.2622	20.9439	37.7471	24.2599
40.5008	21.7614	36.4924	23.2815
37.7989	21.023	38.087	29.8371
37.6224	20.2973	39.2516	24.4264
53.8079	21.12	35.4332	24.2743
45.7847	20.8627	33.0988	27.5889
36.614	21.1903	33.8971	26.1326
45.0215	19.9955	33.7666	26.0079
36.423	22.9499	32.8201	29.2095
43.2393	22.152	42.6719	25.0351
39.754	22.7516	40.6434	24.6254
39.0128	20.5879	33.4713	27.2932
44.2746	21.7033	37.3675	26.6309
42.5658	24.8051	38.3939	26.3143
42.1555	21.6751	37.8896	23.5419
48.7043	22.8773	35.6408	25.4957
37.7852	23.5585	30.7326	29.6472
41.7211	21.0531	34.9278	28.9398
43.808	23.8053	30.7468	25.2212
49.1487	21.7887	33.1341	23.6878
41.6118	23.931	37.1821	23.3259
43.9387	26.5211	37.9	27.584
44.6012	24.1496	41.2009	26.6191
45.8132	23.2572	36.8323	28.3172
38.0443	23.0568	33.7847	22.7746
48.0562	20.8293	34.4299	26.5377
36.7659	24.7313	32.4715	25.8222
38.515	20.7041	37.2828	29.2378
44.5641	31.3108	33.4628	28.7096
47.9987	24.8888	33.3896	27.2609
39.3626	21.8774	45.1591	25.976
49.9815	28.6986	33.8328	25.3553
48.3322	32.0091	35.7809	24.4699
50.4939	23.9897	32.3537	23.9972
42.4719	24.7851	35.4395	29.3506
40.0896	23.1706	34.5161	27.1944
45.3354	22.1166	32.6073	26.2727
42.0813	30.9084	31.9021	22.0527
40.1038	23.7279	25.0525	23.3057
40.8659	20.464	28.3199	24.8886
52.5254	27.997	32.0532	27.5217
39.6562	23.6294	34.3259	29.2686
47.5103	29.3338	28.0028	23.6743
39.7131	24.0526	32.9348	28.9289
36.869	25.736	33.8144	30.0898
39.361	28.6497	39.3997	23.8501
43.5926	21.6441	44.2427	31.9156
39.9153	28.8178	37.2264	32.9384
41.3142	27.9401	36.8186	23.6296
41.0332	24.9712	32.3456	21.0982
39.6403	24.4014	37.303	34.3272
40.532	23.1474	30.945	27.1988
44.9424	21.9647	32.999	24.1754
41.2558	20.3115	29.514	27.3435
41.9799	24.9387	34.2736	23.5992
40.3145	25.7916	38.6488	27.4207
51.0632	22.9382	34.1137	31.0999
38.2592	25.8833	29.9129	23.8442
32.825	27.198	31.2735	22.7878
35.0434	32.1289	29.3489	22.551
36.8635	21.35	35.4454	25.763
39.4916	25.1884	29.6295	27.9131
44.051	23.0663	33.1401	26.3422
41.4444	22.9412	36.0674	22.8357
35.0526	29.962	35.0051	28.224
38.4094	28.8789	37.1966	29.3348
42.0114	22.6493	39.9648	22.1452
29.5302	27.5605	40.3657	24.0287
37.9967	21.0725	32.7472	28.5441
31.5391	21.6125	39.818	27.1213
46.5191	29.5103	39.6392	29.1743
40.0822	54.3424	42.4349	24.77
45.0831	25.4305	36.5385	28.9691
36.2863	27.0239	34.0805	42.7091
32.5572	30.4417	34.0366	27.8385
35.0226	25.5679	38.2728	26.0596
35.4026	23.4017	30.3076	24.6522
39.4703	24.9353	34.0325	23.3856
27.3743	23.2792	38.4565	24.1477
34.5489	50.674	35.9754	59.9523
49.0158	18.6955	33.2387	27.5469
36.4744	23.3556	36.2061	30.4508
36.8582	21.285	32.3013	25.1069
29.6144	33.8257	45.9097	29.5314
38.2145	21.7667	37.821	27.3284
35.8997	21.1757	30.8502	25.6683
36.6525	21.1793	37.9979	27.8226
33.1976	20.8538	35.9407	32.1675
31.8735	24.2603	37.9924	30.4203
33.5133	21.1703	34.2832	29.7865
35.486	21.4926	43.1857	22.4694
34.6351	23.2731	31.0461	26.3433
38.4061	21.2586	38.1531	27.5168
35.0442	28.7213	36.7635	28.1291
29.9166	29.3599	37.6259	25.1532
39.7922	16.9296	34.6138	26.5728
35.3789	22.7993	38.7363	26.1354
44.8753	22.5462	33.6573	31.6865
33.2623	19.8849	34.329	25.861
39.7314	21.3025	30.5591	30.0341
33.6284	24.6609	37.6713	39.9847
33.6811	27.591	36.7079	26.5092
38.408	24.4723	43.6172	29.6295
33.7196	28.5115	33.1001	31.797
56.8036	24.1812	38.3477	31.6749
41.9389	21.5352	37.1768	27.0024
45.2033	26.3648	37.0325	28.0475
38.2689	21.1169	35.4711	26.1437
43.8586	27.2871	34.2522	35.4661
49.1546	27.162	36.7156	28.8189
33.8996	28.0487	36.9298	28.2097
42.1231	29.4406	35.5777	30.2314
38.5744	27.2361	36.1929	28.5951
30.5839	25.3079	30.2226	26.3042
33.8162	27.5546	36.6117	31.3016
34.7599	27.1262	31.4485	29.8544
30.8039	27.8269	34.0243	27.2811
31.1552	21.7098	29.2444	30.4995
30.0618	23.2276	33.7053	29.2772
39.0376	30.5575	30.3546	27.0045
44.6879	26.3374	35.9825	26.2869
30.5947	20.8611	38.7798	29.7708
33.5428	24.8921	32.7832	34.714
38.7462	24.4925	42.5015	30.3738
43.9433	26.6842	33.7815	25.8454
44.5082	39.0557	30.3714	28.3456
32.9965	29.3312	31.9104	25.7772
40.9166	22.8848	30.855	24.9498
33.3527	24.1008	32.2112	26.2038
40.0445	68.0608	30.6705	28.3245
57.1331	23.7608	32.8852	24.6512
35.0365	70.2268	31.5411	27.3178
35.366	25.511	32.3832	35.8762
42.3684	34.7059	26.1046	35.4045
36.0952	24.6785	28.7461	26.422
34.6109	23.2994	27.3265	23.6747
47.4341	22.9285	31.8636	31.7659
40.6751	26.7795	29.5681	28.4422
42.9893	23.0176	35.8796	28.955
39.6136	27.5464	29.5418	30.7341
39.1325	33.1189	31.0088	27.2628
33.2982	23.2133	28.9582	26.2475
33.3168	26.9387	27.2725	33.2364
43.8653	24.2806	28.1845	21.8622
38.9837	22.7026	29.437	26.3967
38.0457	23.6713	38.5752	30.1381
55.4866	31.8557	31.0907	26.1054
36.3482	31.475	29.9619	26.6364
43.5922	22.8313	29.6873	27.2531
39.3167	24.3699	44.4292	29.4406
37.4409	37.7624	32.8651	56.4724
34.3745	25.8342	39.7271	24.8528
35.0187	23.5463	41.0211	23.4543
39.6773	22.1435	31.2822	85.7231
43.4051	21.6182	28.8138	27.5265
39.03	26.8724	41.6612	23.4078
37.3389	25.6695	33.2381	30.861
31.6172	28.0646	32.6991	31.1993
48.481	22.6146	41.8622	25.9634
35.1445	24.2017	27.8865	32.3345
39.6367	24.7894	34.1296	28.5047
37.5835	24.5711	35.4777	24.8493
37.7831	21.9723	38.3129	28.6383
33.5696	22.7741	38.5314	52.757
35.9842	22.0629	31.9047	29.0223
47.5126	23.1043	39.4168	30.0697
41.6669	24.0969	35.2497	24.7789
38.9724	22.0703	41.8069	23.433
36.6173	20.635	38.0881	26.848
39.8773	22.5313	41.0832	26.133
43.8667	27.5609	40.2344	30.7265
34.4474	24.2033	37.0733	28.0187
39.0145	26.0179	38.2129	23.7926
37.5712	19.908	34.4656	26.1505
37.4462	47.7351	36.9711	28.2211
38.8913	46.1097	41.0546	25.4503
55.7685	20.272	38.1965	28.965
58.9251	20.6368	37.3215	26.8893
42.5699	45.5318	30.3881	26.8449
39.7841	26.6523	31.3939	25.2396
46.3642	23.0837	38.8775	27.6079
40.5866	32.6524	36.1544	29.7885
42.4672	22.0755	37.8273	32.771
35.9977	31.4493	39.9357	31.5477
43.1053	24.393	37.8542	26.5417
41.818	26.7168	42.2869	26.1096
42.0836	20.5888	34.386	23.7625
37.6623	25.578	36.7449	31.8597
37.6564	24.9841	38.2837	26.2259
37.0994	20.8624	45.539	26.4771
41.8914	25.6126	41.8696	32.8216
36.5917	22.4905	37.4145	29.0723
50.6333	23.3776	40.4747	28.5803
51.7856	23.8837	37.6476	26.185
40.6564	22.7956	33.3942	29.6307
40.4274	22.555	39.0266	25.5059
47.1353	23.1342	34.9719	27.0957
36.5318	25.3629	40.309	27.4393
39.7039	28.5641	42.6628	25.3644
46.1603	30.1952	39.3458	26.3908
39.1187	26.3307	42.0823	30.0524
49.1432	28.0963	45.7736	28.1145
42.2832	28.2762	35.5396	34.5052
41.8685	25.3259	41.1642	39.1807
65.1981	36.8685	37.077	31.5447
68.1729	31.5102	35.0914	30.9134
37.5966	22.4119	37	26.0639
61.2839	22.4456	37.0201	27.6439
41.9554	23.6584	37.0236	23.8295
41.5948	50.5327	40.1002	32.4572
38.9504	27.2459	27.9173	25.7357
35.6108	21.1045	25.7862	27.8861
59.5285	27.5643	37.0102	32.8958
36.6841	33.7041	39.9068	29.4907
49.7941	23.2067	34.9639	28.7922
33.7839	32.1071	33.9434	28.8881
43.6499	23.3004	28.0374	27.4637
37.4293	26.8876	34.1472	27.569
41.5168	21.6628	36.1589	36.139
37.0406	27.8059	41.8474	29.8759
40.5727	28.6937	31.8833	31.6005
41.3487	27.0538	39.0089	29.5112
40.7009	23.212	29.4006	28.5127
34.8622	29.4554	31.6045	31.2817
36.9612	26.3811	30.026	31.4715
40.366	25.1609	32.0032	31.8325
39.7007	22.243	35.5421	26.782
36.8311	27.8955	34.1544	32.5517
46.8415	23.1678	35.8428	26.328
41.2926	24.4593	40.3408	26.2734
45.3713	31.9224	27.9882	30.875
43.8036	24.0489	31.8146	28.6163
41.0757	21.5256	33.2315	30.4699
38.2575	25.3948	28.4551	39.1658
40.2838	24.9229	39.8218	29.8379
40.2655	26.202	33.1494	30.5223
42.9943	26.3605	31.588	29.3269
33.4784	33.4453	32.7577	32.4966
35.5558	28.3122	28.9237	22.5749
40.3278	22.5062	32.2668	28.9814
36.8712	29.053	34.135	33.8661
36.7127	25.296	26.5246	25.6546
41.5057	23.3495	24.7599	36.5706
46.376	25.3686	36.4951	35.3967
36.7572	26.2498	30.6831	26.9568
40.1084	23.6826	30.6132	29.9732
36.2428	26.5589	36.5985	82.3689
39.9197	31.974	34.3005	31.2452
31.6357	27.8469	25.2149	84.4079
33.6616	23.1446	31.8194	24.2045
35.3397	27.5806	29.8357	29.2388
33.2587	24.5684	32.3875	33.581
29.9693	25.5395	31.1894	24.7892
31.2809	26.5411	31.7462	28.7035
41.419	25.7619	35.0041	24.6177
32.1527	26.1496	34.5754	29.5037
32.9135	23.4408	30.6412	32.6176
40.4769	22.8331	35.3457	29.5871
42.3057	22.3744	30.4588	28.585
35.0273	23.443	33.55	24.598
34.3157	24.2667	30.7746	31.6313
40.6247	29.9627	36.1091	27.7046
40.79	25.3479	35.3287	28.8799
40.6207	27.9186	33.0818	29.2568
33.6372	25.347	41.5472	28.1645
31.0926	23.4348	33.8988	29.858
39.3636	22.6409	34.4871	25.4833
44.35	21.78	30.8228	30.4995
32.1608	30.392	35.2561	26.2517
40.6517	22.6623	38.0197	28.7125
36.8313	23.6124	31.8382	22.9599
38.8891	26.0366	36.9765	25.4041
44.6948	25.6178	39.0721	30.4244
26.6802	22.5083	32.821	22.1545
38.9882	34.7417	34.1472	32.7997
52.104	61.4249	29.6613	27.0151
33.8705	23.6928	33.7604	34.8746
45.8992	26.7982	32.9894	26.9491
47.4382	23.421	36.0541	27.9159
30.9074	25.3492	169.853	24.8412
39.7451	21.0979	32.5103	21.034
38.451	23.3879	36.1284	21.3912
41.6083	23.4864	30.6251	21.1339
46.0129	23.5252	32.4742	22.8683
39.4773	22.8039	38.4748	24.8406
53.6724	24.7478	33.354	21.2183
56.1896	21.6147	41.319	20.7821
47.0455	19.1387	33.3548	21.8528
35.812	22.0159	35.0389	36.7507
45.0137	24.5729	38.9534	22.3377
42.9458	20.9829	40.3153	21.3898
44.1855	24.1671	40.7206	29.1765
36.8199	20.6932	35.6188	23.8987
39.8031	22.0335	37.0112	30.8919
46.5433	22.0375	34.878	21.0759
38.991	21.2218	33.1701	22.3724
41.8431	20.0767	30.3854	23.6713
43.303	19.4961	38.0111	23.2399
40.4589	26.924	36.7117	21.07
35.4037	21.6848	36.2231	23.0739
40.8904	20.8298	37.6451	19.4537
41.1739	26.3321	36.1957	21.3465
45.1795	31.1989	36.4055	22.4378
47.677	33.8012	34.9253	24.8616
39.9469	22.4661	27.4928	26.4543
48.0917	20.5362	37.9591	20.7971
44.4562	19.8923	37.2193	35.9314
49.4764	22.8473	37.6754	23.739
35.4465	27.4417	31.5054	22.9703
35.8684	27.6461	37.7701	31.3332
39.2026	22.5862	38.1392	21.396
45.2069	19.9956	35.8226	22.0521
39.8136	19.6907	49.4596	20.8594
38.5572	20.8924	43.1908	25.186
41.539	21.8344	37.5537	21.4779
40.7878	27.9476	35.2933	22.7709
39.9462	26.527	31.5803	20.8005
42.9324	22.1111	29.4563	21.6742
39.3114	23.9314	31.1199	22.1862
41.2062	24.5085	41.9052	22.2223
48.2418	21.8301	35.2164	24.8443
39.8834	25.7092	38.8033	25.1317
36.5235	26.2462	28.7957	22.1545
51.209	27.216	54.5394	23.0073
46.6497	23.04	33.1568	23.932
57.0542	30.8041	31.0157	22.48
39.6789	26.893	31.404	25.6802
42.1946	26.2631	34.2759	24.1702
41.6293	24.6574	35.0011	23.6338
40.9979	24.5446	31.0201	24.1987
48.6226	20.6163	35.4006	23.6082
45.1239	23.3753	28.6743	21.4232
44.7068	24.5438	49.9292	23.3062
38.6511	28.4326	33.5763	21.9343
43.709	26.5837	25.0688	22.8686
42.9407	27.4281	51.2239	24.4901
42.2193	25.607	35.9535	44.6432
46.6796	30.7242	34.8044	24.706
43.7698	26.9211	30.6481	27.3088
41.8648	22.2084	37.9572	23.1821
52.2277	21.7304	81.7027	23.3522
41.5741	23.2197	30.1762	29.8095
45.5902	25.0419	37.6268	22.4901
35.7069	22.5781	36.2017	24.0971
50.0435	20.1541	39.0837	27.8191
47.6494	31.9378	30.0351	23.2174
42.9501	21.6883	24.5942	22.9833
43.5714	21.0254	28.0523	23.6947
40.3746	65.0534	31.05	25.6075
86.8771	23.9951	38.9745	22.1887
37.9482	28.3523	31.6604	20.646
45.7623	27.3153	30.3337	23.7691
44.1474	24.7744	32.0652	21.4273
40.5665	22.9804	33.2104	23.5797
40.1969	25.6858	32.0867	23.912
29.8626	26.8311	29.8177	22.8751
37.5357	23.1119	29.274	24.4657
40.5781	22.2236	36.7677	23.5756
42.9736	22.9864	27.2349	23.0408
36.6397	28.3578	49.726	21.3232
41.9716	23.103	33.4678	20.6314
44.6218	25.5236	34.5189	22.8659
42.6242	21.8437	28.0521	28.2751
47.8064	23.2136	33.5915	23.1098
47.5692	31.3782	43.2141	21.3361
41.2262	23.9399	36.6681	21.9689
41.087	25.7976	30.1854	23.7396
44.7496	30.0692	38.8572	23.3911
60.0003	22.7528	34.1052	21.032
34.6528	24.6122	36.1233	26.3685
40.7043	25.4728	32.608	20.8053
41.3445	24.2178	33.4567	23.1497
36.8526	22.6567	36.8764	22.6829
42.6788	22.2557	45.0656	19.1962
36.6655	24.8374	27.5976	25.36
39.7595	26.9223	38.0615	25.6976
43.8876	24.8191	42.7228	21.8608
73.5518	25.2585	36.9317	21.0381
41.435	39.1702	38.9599	22.723
40.6879	38.271	30.7089	22.4603
36.1341	25.588	44.4024	20.5813
36.7105	23.4794	36.685	22.6441
41.312	24.2747	42.8683	21.9649
35.9375	27.4176	35.402	21.0956
48.286	23.7228	44.487	20.3917
40.1557	26.7879	40.1732	26.1456
35.6881	22.5533	42.3296	20.9013
41.5464	25.2425	46.0613	20.2132
40.4134	52.0893	35.3349	22.1555
42.202	25.6682	38.4584	22.1901
43.2169	49.5474	35.6801	19.5428
38.2023	21.6883	43.4873	20.6196
36.8719	33.0532	46.2637	36.2824
45.8006	42.8151	42.7488	21.9631
39.3893	25.2202	39.5348	20.4433
34.9585	26.3089	44.1314	22.8155
41.6088	34.3564	45.6774	26.0795
38.3385	22.6481	36.9959	36.4404
35.1773	34.24	38.6776	23.175
41.5905	29.4069	34.2802	19.335
35.9961	23.2482	43.4811	24.9094
44.1528	27.6746	35.7317	20.4663
44.0945	25.6295	36.7546	25.6318
42.0657	25.9876	43.6869	23.0524
47.174	38.5536	44.6852	27.9662
31.1417	24.9479	34.5445	25.8666
34.3336	27.361	35.7173	20.3957
30.8778	26.4195	44.6016	31.2028
38.4664	26.1767	35.0702	21.3564
40.7134	29.3359	38.3764	25.8844
43.6477	25.3041	42.1674	22.5568
46.6865	24.5064	37.2376	21.4511
44.0589	38.9271	41.3938	26.0523
40.1598	26.8437	43.8775	27.9148
35.0198	31.0498	49.8332	24.9954
30.7491	26.1704	52.8695	24.7847
32.3928	23.6648	29.0136	24.4968
34.78	23.3007	38.7172	23.1822
32.2421	31.1078	42.4114	23.5835
34.9618	21.4673	45.1231	26.235
32.5245	22.9338	40.3962	76.1727
43.5206	30.2631	37.0857	24.0191
38.654	24.7066	36.2604	24.8466
29.7391	25.3585	36.4299	41.245
34.6585	19.8762	30.5129	24.232
41.3221	24.4918	32.4091	39.8647
47.5098	27.3449	35.9175	21.1886
33.1509	20.7876	62.3634	24.7288
34.8772	21.209	61.7744	30.6574
34.4665	23.7051	37.245	23.1854
31.4649	25.7353	47.7256	41.7587
86.6547	23.9927	46.5402	25.9552
39.9427	21.8637	41.5839	23.8374
36.5757	23.4556	37.3824	27.8593
33.11	24.9996	39.0113	22.7632
36.5161	26.7856	40.7604	48.2026
28.7605	35.5165	38.6206	22.2302
37.0001	23.7419	31.5139	21.5495
33.8039	22.0127	42.9415	23.9517
41.0976	23.1976	40.9483	53.6105
34.2508	29.0285	33.7482	22.4225
31.7052	26.4431	38.3148	24.8663
37.6433	25.9401	38.6405	24.0769
44.114	26.1688	45.3021	22.6697
36.6097	28.8209	50.7368	26.6491
38.3313	24.0948	34.568	24.1166
39.6645	26.6721	39.5317	24.7713
38.8835	22.2251	38.3177	23.6792
34.8761	29.637	40.597	24.4956
40.5365	30.8058	34.6379	25.2971
37.2614	27.2918	33.9152	25.3453
35.3194	25.7428	33.1838	31.4153
36.9718	24.1118	30.2471	22.7537
38.6903	46.6599	33.7746	23.5896
27.2458	22.9038	35.8152	24.1297
26.1404	27.5913	28.858	34.5487
42.1188	28.3769	33.1754	72.7974
35.7721	32.7744	29.2069	21.4235
39.9134	31.1262	29.8396	24.1799
35.5804	25.4959	29.0547	26.8341
46.5961	27.9715	35.9284	24.7361
41.4754	25.0868	37.9374	24.8527
51.7138	25.3294	31.3939	27.5258
42.284	21.6259	33.3787	22.0705
35.199	34.3292	31.6304	28.2974
35.7664	26.9849	34.3865	29.9665
41.4771	25.5566	32.4683	25.224
41.9607	23.634	31.3325	27.2209
38.336	25.8333	38.2729	32.5284
40.5555	27.9257	38.9068	24.9317
36.9647	26.2725	37.5264	23.9699
34.3473	27.8211	32.9584	24.3645
45.0838	27.6349	34.1518	22.1194
45.4	24.0821	33.3407	25.2571
31.8098	27.2028	32.6759	22.9164
42.2849	24.3294	32.7089	22.7309
34.8816	28.2275	36.2076	55.8598
35.3013	23.001	36.8804	23.2216
35.4704	27.3102	35.2803	23.1524
37.3705	23.03	34.9175	23.5489
44.3152	27.0548	34.2964	24.8979
45.9852	24.829	34.8716	23.6476
45.0944	25.758	36.8455	23.6853
43.2049	26.5215	35.7781	25.8015
44.2845	23.5502	37.4061	25.1143
36.0752	26.4022	31.2837	30.168
48.5768	28.0399	35.2338	29.3328
39.8804	21.3006	31.0627	24.5292
62.1774	29.1998	23.7619	35.9076
46.0377	27.7339	35.1711	23.7785
42.0102	25.1633	37.0431	22.4716
39.5641	32.6415	31.8505	21.5351
38.8141	27.7509	28.8853	24.3341
46.1757	23.6245	37.1441	28.2402
47.3917	22.7759	37.4113	25.7403
42.2333	28.9197	30.6249	21.7203
47.8173	25.5386	34.2063	30.4105
43.5724	27.0657	31.5333	26.2161
49.9611	30.6184	32.3209	20.5697
36.0408	28.1156	34.3205	24.2152
45.6607	26.6863	32.797	21.1052
39.815	24.9539	33.412	19.7074
39.3238	22.5476	35.6159	21.9363
47.568	27.2624	37.2563	22.0125
41.4384	24.6778	33.4743	22.4773
34.2062	21.7445	36.8699	20.797
36.4071	28.9297	35.511	23.9735
74.4268	23.7656	33.4567	29.411
39.9678	23.206	43.1913	23.2319
47.3769	26.2859	36.1096	23.6609
46.6173	26.8805	37.5972	21.7181
39.5912	36.4722	32.6394	18.0407
36.0727	24.0466	36.7042	25.3961
45.3343	31.9823	32.8534	23.6776
44.3622	26.6165	32.237	26.2803
67.8372	28.3407	39.5968	33.9797
48.4546	20.378	40.9325	46.0216
42.0816	24.6266	38.5049	24.5755
40.7311	25.5017	44.0015	34.0914
40.884	29.363	31.5859	24.7916
38.5525	53.1839	31.7489	33.4481
38.3156	33.5239	34.9695	25.0081
37.5446	25.0916	37.1307	25.6379
45.2695	26.8596	134.373	25.901
39.1697	24.7657	34.6162	22.4768
41.7635	28.2044	58.5551	30.3505
39.179	25.0576	37.5829	24.1925
31.4849	23.731	35.8616	28.9561
33.0685	24.9773	34.372	58.1776
43.0847	23.027	49.7012	21.2556
38.7756	23.8584	35.4446	22.3052
34.8772	24.8924	36.2846	49.3099
35.8761	23.0883	33.1655	25.4182
37.1732	23.2018	38.4825	24.4251
39.145	26.0794	36.4146	24.2915
36.1051	33.0626	42.1876	24.9081
36.7487	31.7887	40.3553	22.2134
39.3082	28.613	37.6174	33.6223
36.1073	24.0379	33.6065	23.7444
37.6667	23.1078	29.3785	39.1825
38.7333	26.4078	34.3713	25.5715
45.5422	28.8031	38.8246	24.4819
31.8816	26.7781	35.3049	24.8378
37.662	29.6978	33.6795	25.4103
45.0488	29.8485	39.762	28.2467
38.6576	26.6768	36.9638	27.8876
40.9636	34.9665	30.1312	21.3967
35.8924	24.2866	30.6124	54.1085
41.1533	22.2236	35.4856	29.3574
39.4739	24.9496	34.8627	22.9453
37.6216	33.7466	33.1967	30.386
34.4082	31.0194	33.2517	52.2277
32.171	28.4574	35.6969	24.3315
34.88	29.2575	33.1541	25.5793
31.4611	21.1257	30.9507	32.2231
25.9651	19.8862	30.4829	24.1542
36.8695	25.6812	38.7229	22.3437
29.805	25.6137	42.4627	22.7056
32.8891	22.5199	32.3027	25.9294
31.9444	24.8958	40.0586	28.4859
36.1419	23.8999	34.3723	24.0633
30.9662	26.6943	48.502	21.8208
31.0195	20.8846	39.124	24.2368
28.1178	23.9519	37.3349	34.5403
30.6827	26.3016	33.7633	27.0171
28.9392	21.4078	34.5114	19.8615
37.0491	19.623	27.1754	21.0913
35.5242	27.0497	35.1798	20.4885
25.2501	21.5821	51.6883	41.4657
34.7845	20.5633	33.4185	31.3466
33.1598	23.3115	35.3974	47.0131
33.5059	22.4157	32.5593	27.4404
33.1133	24.0455	29.3248	22.5617
32.7325	20.6803	32.8369	23.7037
35.2908	23.8993	39.3391	24.0688
33.8336	22.0815	34.1237	44.1587
33.6702	21.5442	34.0669	28.029
35.4096	26.2729	29.1008	19.552
33.2702	25.9787	38.5897	22.131
40.714	21.9734	31.0654	33.4072
33.7666	28.3151	30.3667	26.1821
34.7043	23.4279	30.2065	26.3587
31.3028	22.0812	31.7841	20.6748
35.0991	23.5101	31.9691	21.9996
35.3282	25.7493	35.1167	19.9715
44.2938	24.9449	32.2052	24.7281
37.6651	28.3426	31.6854	24.6574
44.9535	28.2994	31.1629	21.8731
28.365	28.917	34.889	23.5302
43.7589	26.0672	34.6129	25.9721
36.6876	31.9144	35.3956	27.2279
40.2467	25.1789	32.843	21.9379
34.5999	28.6299	35.4477	27.1385
36.059	26.4622	33.9664	23.8379
42.5453	37.1808	28.9197	27.645
50.573	23.7886	42.5461	26.6551
36.7619	20.2646	34.7368	24.0367
44.8603	21.1061	36.0691	25.4605
42.247	24.6048	39.5338	30.3511
35.0201	21.4536	31.0916	23.723
41.2627	23.869	40.3368	24.8959
39.9971	23.9767	61.4832	23.6957
42.2913	24.6357	34.1485	28.4164
44.2356	21.553	33.2135	26.9124
39.2865	23.7983	36.4195	34.6207
37.5956	21.2611	33.0866	23.0888
57.0559	23.6653	36.6612	24.2117
37.6258	26.3591	33.1122	23.2914
38.3009	29.5512	36.4571	23.196
42.3451	26.7334	37.1492	57.9476
39.8988	23.4347	35.7317	25.7976
41.6419	27.9862	33.2567	33.4168
53.7239	22.9418	38.9841	25.1011
38.2602	24.042	43.7072	24.7357
39.9059	25.0286	36.7871	30.247
34.5942	23.0974	32.0411	24.7235
39.7283	24.7779	33.9435	26.0795
39.3554	25.4714	34.5523	24.6847
42.7229	34.0063	43.302	24.876
44.0001	24.7201	49.7268	30.4058
45.3723	21.4048	46.823	26.2572
51.2144	22.5997	33.4978	30.1264
40.8786	25.7807	36.3217	26.3679
48.7976	24.9837	74.0795	27.9811
43.5676	29.2274	40.6038	22.9336
39.0859	22.8058	35.3564	29.4766
48.0652	26.2167	42.26	22.3597
33.974	22.718	38.8338	20.788
41.3976	26.6849	32.1814	25.9379
36.7291	28.0303	39.7611	28.9922
43.0419	32.7368	39.2301	23.1288
38.7539	23.9273	39.5339	26.406
36.6135	24.2794	36.5784	25.2821
40.2827	24.4958	39.4502	25.7418
37.417	25.5888	36.0395	26.6413
37.753	27.1095	39.1665	24.4774
49.311	21.0311	40.8688	27.2758
37.9171	29.1298	31.1167	21.4294
42.9048	23.1915	41.1066	23.9964
46.1838	22.2825	48.696	29.0557
45.5584	24.5474	43.9251	24.307
34.5753	25.4216	45.3738	23.3417
40.2293	24.4466	36.8607	23.3125
41.6048	22.4175	53.9331	23.3825
40.4673	22.0494	39.4631	21.7355
43.9852	20.8222	41.2375	21.3239
41.0481	20.0375	37.5152	23.0154
45.1626	29.1357	41.9373	21.5263
36.5876	26.4959	38.5928	19.5297
37.1911	21.8765	36.957	19.3958
38.6699	23.652	45.6106	19.2222
44.8456	24.7351	42.5625	23.3204
40.3856	26.833	36.6545	23.6114
39.0222	26.2964	36.2183	23.3404
40.5217	23.0754	32.8391	24.7895
35.2463	26.1957	41.2483	23.7506
44.7268	24.3263	45.698	26.7983
40.1633	23.7966	33.6718	25.1502
46.6119	23.4109	39.038	20.2541
43.3302	22.7765	33.5482	29.5021
42.2592	27.056	42.3227	25.2598
42.6717	29.2068	34.1529	20.6749
40.8108	25.7639	42.2973	23.8909
43.7879	22.8784	40.7134	22.8927
40.3058	28.6372	40.7427	24.0003
39.8061	25.2279	36.0011	33.1519
34.4889	27.7175	29.0074	26.4038
38.854	25.9378	37.7818	26.0959
43.8884	28.6002	30.6549	28.1623
45.9128	26.4174	33.0211	27.0874
34.4987	28.8609	34.903	23.2221
48.4438	29.1065	31.9662	36.1856
38.1554	25.6762	37.9477	42.4995
44.2412	21.5203	40.9946	26.4833
39.7289	25.7575	34.5459	23.1182
34.0296	25.3342	27.0898	27.3453
54.0792	26.3544	36.8222	23.0773
31.8802	26.7532	37.0294	26.4169
43.0346	32.6485	32.9923	25.4434
48.0684	20.0627	33.6729	35.4563
40.3118	27.3941	33.7505	31.419
36.9428	25.1977	41.2639	24.8978
40.5896	23.4555	43.6731	34.9142
30.9601	27.0161	31.5343	29.0115
40.0958	25.7205	28.2784	24.9334
37.6414	26.8093	30.6099	69.2293
41.6502	24.334	32.7725	28.3859
40.0981	21.4157	40.3408	31.208
34.1419	28.0089	34.9727	36.1226
36.7964	24.4017	29.1351	26.3629
43.258	49.1775	27.0304	31.6049
38.7638	38.6134	32.0386	35.5296
38.5634	35.1121	47.909	31.5316
40.6759	18.8718	38.31	24.4052
37.7685	18.578	29.8983	30.7005
39.1268	39.1281	43.4726	39.491
41.3285	24.025	33.8065	26.744
38.403	27.7058	38.522	24.9092
37.0597	28.2664	40.5505	26.1388
36.532	26.8347	45.0863	27.1944
36.5377	39.1297	38.3528	28.7085
39.1023	39.7253	34.7648	31.1051
33.8393	24.2311	31.6143	26.6214
36.9422	32.4637	39.4507	25.9087
31.9243	20.8667	64.3149	32.8978
38.1449	22.0893	37.1205	31.8392
32.8543	21.6026	40.1122	29.6794
28.0499	27.0431	41.6384	30.8737
37.9608	21.9165	32.5353	27.5104
31.8855	38.7429	40.2545	27.8154
31.7623	24.1673	40.823	27.3947
27.3268	28.1232	34.8682	25.1675
32.8166	39.4117	40.8412	30.6203
42.4853	21.8725	35.6769	27.6313
51.8784	25.1289	36.9171	33.9527
31.9202	37.6877	52.1268	25.4618
29.25	22.9386	47.8255	28.0801
35.3098	27.0382	42.2276	26.8705
27.6813	40.3077	37.8207	28.9278
29.8928	32.0118	46.197	26.6393
40.0707	37.6092	33.9719	28.2875
32.7051	27.2054	47.0507	26.7921
26.3704	31.0304	38.8233	27.3756
38.2355	28.3885	44.0146	27.529
37.8834	36.7244	46.4068	25.2864
36.9677	28.9312	41.8073	27.3135
30.6465	22.1734	41.593	31.1686
26.7411	30.3268	36.1437	24.5904
36.8741	26.9103	46.8805	25.0201
38.5385	21.7428	44.6095	23.5821
30.4293	23.1562	44.6863	29.1967
37.5777	33.8501	39.6628	31.3523
41.701	25.0329	44.5103	25.1854
39.8087	27.538	43.5607	29.5481
27.1266	27.4988	44.7993	28.4245
39.9989	26.0393	41.9145	24.5686
34.5719	23.9637	45.9943	29.026
34.7005	22.2859	47.7975	25.0196
35.6385	21.6543	40.2997	25.8982
37.7292	24.4563	38.7178	26.6223
35.4669	24.3796	51.2783	22.9679
32.9111	24.3159	35.8636	24.791
37.8324	29.0602	32.7746	21.5631
34.5494	25.1863	34.5392	52.1858
31.7063	25.5964	28.2092	28.0669
39.9789	28.3543	36.3375	30.1745
36.2163	25.4966	32.2312	24.8541
35.0631	22.412	29.6892	21.7949
38.5505	29.5643	36.3948	26.1001
31.6232	22.3402	44.2959	25.7006
35.1436	23.962	37.5185	24.6712
40.2845	26.5588	36.6525	23.0673
40.7841	32.5862	38.3242	26.5649
38.6677	22.8215	34.0345	25.1429
46.2684	23.5267	40.549	21.8025
42.8305	36.0237	41.815	26.197
39.8131	24.2064	38.116	23.0022
44.6583	21.8022	33.2697	30.8292
45.1305	24.0259	29.6696	21.9895
39.6664	22.9043	37.85	25.3647
39.4018	26.6677	32.0259	27.8788
47.46	26.0809	29.3113	25.2607
60.8012	50.3508	32.0136	28.048
39.718	22.4815	31.6046	26.5156
46.5596	41.3449	29.4661	25.7154
38.4645	25.2585	29.021	26.9442
39.5173	29.128	32.553	25.4566
38.9572	28.0344	33.6881	25.8314
44.351	21.0314	33.7699	28.5685
36.925	24.4766	32.0908	32.245
45.0007	22.2568	35.0543	22.4814
37.4397	25.7879	33.9801	28.5777
46.2611	23.2299	34.9702	27.9584
36.7671	24.5165	36.2911	28.0966
44.1204	21.4942	33.8717	27.8578
40.229	21.7902	34.661	30.7947
39.5079	33.5862	33.9436	23.5725
41.738	22.5174	40.1644	25.0373
40.9847	22.4706	27.7266	30.5245
42.2039	24.7049	34.1021	30.6974
41.499	25.9632	37.3201	26.5851
37.9485	29.9725	53.0716	29.2593
39.6856	34.2249	37.1679	30.0046
40.8199	22.8335	34.8554	26.5045
43.7665	21.5448	30.9977	24.7914
37.0594	20.5784	35.6457	26.331
38.9174	24.1897	31.5536	24.4861
36.0025	19.6417	33.3125	24.9837
39.1516	22.2335	35.517	29.8222
48.8372	29.9454	34.3841	30.6765
36.2568	22.9216	36.0047	22.6265
40.8202	26.138	38.938	30.405
38.6057	18.3791	42.0474	26.5737
31.7142	31.367	52.235	27.0048
52.7509	24.215	33.2322	22.7502
49.7564	18.3756	32.9345	27.1027
34.7631	23.3234	39.3586	35.9723
36.9317	22.9333	40.284	34.5763
38.0835	20.0495	34.3036	26.2605
36.1253	22.1766	45.153	24.3778
45.8573	21.1478	34.9355	32.8388
42.1326	23.0241	43.4965	28.9915
35.5827	24.7106	36.0284	25.6074
33.0339	26.1943	41.7066	27.1087
40.0491	28.59	37.8186	30.1963
30.1189	56.4363	40.3027	26.2926
35.6723	29.2873	38.7018	30.7697
45.3951	47.8445	48.8282	28.4472
47.0296	24.9098	39.3251	30.5302
38.2827	54.814	31.8865	26.5727
41.6234	23.6212	45.8512	24.8117
34.1293	25.953	31.6689	26.4009
55.043	45.7596	43.0525	28.1336
37.0408	21.1891	48.3692	26.5075
38.6379	29.7082	44.7772	31.5333
33.0614	23.7644	42.4544	28.7635
39.9728	20.5804	38.0873	25.18
37.8604	25.5258	37.5159	29.6799
40.6768	29.1749	48.4153	29.8393
35.1146	21.7544	39.977	27.6171
33.5948	26.7921	34.4933	24.8492
40.0958	33.4177	46.9376	26.9691
42.0915	25.5377	44.2577	25.0702
38.4354	23.395	33.7871	25.5905
47.3748	32.0862	37.0944	25.923
38.7267	26.2818	40.365	25.5973
37.9086	23.6005	36.6134	26.4043
39.8419	41.3702	37.0481	28.0564
35.4327	23.5526	38.7459	28.0529
43.625	29.8916	38.4824	26.6604
34.0845	36.0051	37.5473	22.9096
36.9117	26.5112	34.608	25.5036
39.2718	28.7386	42.8399	29.3585
36.1946	23.7818	29.521	29.6785
40.2166	38.0352	47.6941	21.4534
36.1004	27.3625	29.0501	23.3866
31.8047	25.8168	36.1954	26.5765
48.1404	30.0654	36.8532	23.1902
29.953	23.0287	35.4682	23.2171
65.7328	31.0517	35.9369	23.2169
64.9644	47.8925	31.3908	23.5792
60.8143	34.1973	48.0169	26.3472
36.3914	48.968	34.3567	23.4119
42.2057	41.2934	25.1507	24.547
35.1098	26.2243	36.6114	24.1751
55.288	31.8449	36.5371	30.5077
60.9508	30.9677	36.6331	26.1205
34.4848	27.6421	38.9151	27.8169
36.275	30.8584	35.2011	23.7276
36.1246	25.4278	40.4824	28.7787
61.5604	38.5228	33.6381	26.395
38.85	30.1823	35.0008	25.0834
63.0642	26.0788	37.1252	25.5183
37.014	29.0021	46.6611	26.7131
62.8209	42.8682	37.5571	32.7714
56.8311	26.9895	41.0534	30.723
45.8921	39.4515	44.9684	25.6413
57.9752	34.1536	40.5741	26.5259
39.0042	22.8504	36.5488	63.0656
38.3855	34.9923	42.5606	28.3395
64.0695	31.7778	38.8629	27.8919
39.1823	28.6293	39.8499	24.8669
50.8267	27.0664	41.8076	23.1273
36.8209	42.1761	43.3066	30.2547
58.7256	41.1553	48.2382	40.868
35.1581	27.0148	84.0801	27.6019
62.254	27.1986	44.4307	31.2239
38.1409	26.0423	39.5753	32.5787
52.2924	28.4075	40.8079	26.9348
38.0071	42.405	46.2152	29.2185
60.1714	22.9967	53.27	27.0707
32.6128	28.1643	36.182	43.2134
57.962	32.8531	48.0068	33.1308
64.3997	36.4008	38.7554	24.3165
66.8587	27.2902	50.9915	27.64
43.0807	26.2415	46.2798	35.9898
61.947	34.9489	42.6117	29.6557
39.3491	28.8666	42.361	30.1248
37.1447	36.2047	45.2608	28.8968
58.7903	36.3386	38.1586	25.8441
37.5884	21.7997	38.3256	35.0371
37.2836	32.2042	47.5724	32.8966
39.0757	28.6325	43.8788	26.1414
40.2243	23.1032	51.156	35.9277
48.3684	37.2937	43.1424	29.9167
60.274	24.4073	47.2335	29.6567
40.2174	23.8289	47.6601	27.8305
67.4575	31.7739	47.3961	30.9274
68.7601	18.9358	49.991	49.446
37.392	23.4064	39.2339	30.6868
61.9305	23.9642	45.8974	31.552
69.1858	22.7608	43.0143	38.5141
36.9524	23.0651	41.9273	30.4867
67.5948	19.8256	51.2535	30.0564
42.3006	22.5815	44.4623	30.424
35.96	21.0567	54.3334	37.2047
38.2337	25.1787	43.359	36.7899
52.1661	55.7815	42.5982	27.7384
49.2732	21.493	42.0536	27.7011
58.5313	24.0575	45.0797	35.3789
62.6238	27.9735	46.61	29.8965
33.5795	33.4403	52.5539	24.634
40.046	27.2492	46.4956	26.8205
38.004	30.2821	42.4302	23.8059
38.5628	60.8878	44.6518	28.1123
49.7612	24.4707	44.8708	29.9212
53.6513	22.9608	47.393	30.0851
40.8005	36.7642	41.1292	28.2158
35.4984	27.2597	43.5665	30.7684
33.9979	24.8846	36.4744	25.6058
25.896	17.4755	41.258	28.0174
44.3652	33.8095	39.6022	29.1716
39.9038	24.1869	35.5361	25.835
38.7062	28.5592	37.9657	23.5787
37.2082	22.4548	41.7705	30.2721
36.3977	32.0973	39.5281	34.4349
41.924	24.1546	39.0163	30.7589
45.4191	31.1628	42.5003	25.8964
38.1605	21.6768	30.7803	29.1509
36.5172	27.1572	36.8614	32.8048
85.4262	27.4305	32.677	35.0575
36.4596	25.8126	40.2177	24.5895
39.0236	21.4445	34.5522	30.8588
41.1401	26.653	30.3902	31.7031
37.0636	30.8331	29.6411	29.902
38.3092	23.1152	42.4066	26.2139
64.8809	19.2113	33.7974	27.1807
46.4115	21.1964	31.8233	25.5019
48.2043	26.2383	36.3382	26.1146
50.8353	27.3483	28.1664	26.8315
38.5507	25.5225	34.1725	24.8026
37.2655	29.0822	40.9057	29.4172
33.4398	39.5521	33.3143	28.6362
39.5224	38.9634	36.1138	25.5766
35.3438	27.2148	42.2933	21.0754
38.8683	25.3621	37.417	21.6839
44.195	32.0199	33.4204	22.7286
41.9141	23.9091	36.5874	23.6239
35.9025	25.1721	38.2622	19.9564
33.3843	24.8891	38.4371	21.0291
38.595	24.352	45.5159	23.1532
45.5519	34.3511	56.3779	24.9559
44.5466	28.1514	35.4028	25.9149
48.9392	25.7774	48.0387	26.4254
35.7677	26.8677	38.8612	25.4102
42.2834	28.3552	37.2837	22.1589
45.1065	25.8684	42.4873	22.6246
36.5193	23.6031	40.7836	23.1378
38.7513	28.8459	39.4171	23.8561
43.5174	38.7098	37.5323	23.7949
44.4643	24.658	36.5212	29.3046
39.0859	25.5792	52.9883	27.7811
36.8373	24.4797	49.0253	26.9062
42.5301	45.4181	42.057	26.4751
35.9307	26.2183	46.4318	30.3075
40.2016	24.6749	46.4313	31.3867
33.3202	30.305	42.446	22.8475
40.7614	24.324	41.0306	25.7488
32.9878	26.3775	40.8798	25.1892
39.9965	31.8249	38.2054	27.3768
35.6552	30.9874	41.0914	28.4809
38.1053	28.6965	47.2263	28.4767
37.9581	27.6433	29.8843	30.6056
41.1664	33.6174	45.6726	28.1656
36.0049	28.2083	47.8971	30.3527
46.1318	27.7532	49.1049	30.6206
40.8455	22.5391	35.8258	30.2412
35.8285	26.6701	45.0135	18.3274
43.5926	26.0916	41.7346	29.4611
32.1666	26.1064	42.016	28.9661
42.8163	22.696	41.9477	29.4288
40.9728	25.6839	31.7249	27.6559
37.4733	24.0758	51.0627	29.698
35.0082	33.0823	68.0336	21.6862
35.8647	27.4509	47.6708	26.8473
42.1362	34.3697	41.0196	57.1195
36.835	28.3959	45.9365	27.2507
26.3151	24.9988	43.1526	28.2451
36.8618	34.6736	48.6834	26.1926
39.2528	30.72	48.0709	29.4788
35.4985	31.0666	40.4813	28.9432
46.0297	26.8936	48.773	35.3689
37.3139	24.5961	46.4435	24.5446
40.335	27.0733	42.0738	28.2159
38.7722	24.5948	32.7088	25.5532
34.5871	21.4076	53.7459	20.2538
34.2282	27.503	44.772	27.8324
33.4748	32.7648	35.0177	41.1658
35.1181	21.9847	40.0648	24.7174
31.4902	22.2889	41.7651	34.0192
34.6156	29.8013	45.5338	25.5067
33.9988	27.8631	38.1868	30.8848
38.1839	20.7451	46.4834	25.4313
35.7111	20.7443	48.9156	32.0013
33.4071	26.6871	44.7416	24.589
32.742	24.6215	42.4286	23.8466
33.5693	20.7206	42.7056	25.4036
34.8156	21.2032	43.2857	24.2906
37.6331	20.8163	43.0219	30.8141
33.5244	16.5032	46.1699	25.3234
42.863	18.7582	43.1755	29.1694
38.5232	18.9196	41.7701	25.3653
33.6562	25.9834	52.0782	25.0015
33.0376	20.5586	44.1224	25.9414
30.8359	31.2734	48.9903	28.3044
36.7659	77.5834	43.059	29.5899
34.248	26.8073	43.0668	17.1502
39.6365	27.8825	44.9134	25.1308
36.6399	31.6582	36.9661	20.9881
50.6941	25.5949	42.6411	30.6154
39.9306	26.6816	39.5942	23.467
34.4504	26.5953	50.8378	27.3745
32.0481	20.9058	47.8236	23.1978
34.9334	25.6968	44.6523	29.0617
33.0864	20.859	38.5782	27.4581
34.4066	28.5159	38.3233	27.4374
38.9931	30.4951	28.1067	31.4646
37.8133	22.0534	39.4267	40.6988
36.9301	25.3262	44.3961	23.5594
37.3682	23.6013	76.7203	25.9396
35.862	22.5842	42.6846	36.8671
35.8623	23.491	44.5094	27.9982
37.0836	41.8842	46.2881	25.1072
42.3039	24.6666	36.6381	28.0033
66.7354	23.4599	44.3389	26.8291
37.9018	25.7607	44.8761	25.5584
41.0319	27.2974	31.7301	28.2972
38.7352	23.3207	31.508	27.9301
36.1877	38.731	29.4443	30.5596
38.4579	33.5312	37.3064	57.1221
38.6217	24.8407	34.8997	26.9585
41.5756	27.5078	31.6826	31.8725
43.8897	28.0981	33.1074	29.639
39.5552	25.5389	30.33	38.2246
38.2146	26.3982	36.9481	42.3579
37.0793	23.151	31.9286	65.2606
38.3971	25.1888	35.142	45.1431
40.3424	24.7914	33.914	34.4019
43.8543	27.8673	39.501	35.9381
36.5829	24.3524	32.8233	47.4878
40.2641	30.3143	36.4224	31.0269
40.895	33.751	34.5297	30.5647
42.7989	29.4911	34.5009	31.2221
44.1846	32.6725	38.4407	31.2654
37.0396	47.0197	38.129	26.774
46.1126	34.3618	33.6965	27.1544
43.8914	25.45	32.5346	25.2077
39.6859	25.31	43.6486	33.537
42.923	25.2054	35.2786	35.84
44.0486	32.5663	40.9669	30.2981
44.2385	38.3305	39.4263	25.965
43.0601	27.5066	32.6377	26.7248
40.0065	25.8405	39.4009	28.3322
37.7799	28.934	37.7562	25.2578
35.5716	24.4769	35.6853	27.6931
38.3374	31.4845	33.516	40.1528
39.2178	24.9457	39.829	26.0063
36.6055	29.763	39.3579	27.0756
36.9551	27.6405	37.0966	22.2355
40.5497	29.3001	33.1986	37.0714
40.8601	25.5108	37.9641	32.5074
45.725	24.3896	40.1951	60.5617
42.0488	29.4823	35.7979	50.9826
40.6005	23.4706	38.5172	30.0232
41.2423	25.7998	36.2388	25.8165
38.5845	30.5904	33.5954	28.7589
41.8315	27.5344	38.5358	25.8411
40.0043	26.3598	40.4922	31.3813
42.8951	29.7987	34.7221	28.408
38.8341	33.1443	37.1641	24.3858
46.0217	30.1078	39.6135	26.3344
36.0928	25.5448	44.6272	26.874
40.3482	31.2092	31.1806	25.5112
36.7241	20.997	48.1649	44.1827
38.5936	34.6541	42.8916	34.0092
38.9919	30.1551	34.2191	26.7456
31.9226	23.5228	33.8244	31.7009
40.2044	32.0829	42.173	26.5888
39.445	26.6514	42.1939	25.4704
39.4564	29.0671	39.0055	31.5113
43.9591	24.2547	36.7116	22.2277
39.1455	36.1781	42.3242	25.7842
38.3571	29.3205	35.77	23.6962
38.4201	31.1573	35.6678	25.6649
37.2198	27.2671	39.4532	48.7913
38.4653	25.3755	33.4472	43.1394
40.8553	35.0388	37.5146	26.2883
37.1785	31.3166	42.4775	49.0053
38.9794	22.2788	45.8546	52.6011
43.7544	23.7594	37.4767	29.7808
41.2417	33.3657	39.8156	22.6449
41.5889	27.413	41.8939	23.0737
33.0803	25.6005	42.0891	27.1506
44.6838	23.77	45.6453	28.3873
42.7621	25.5278	42.6203	26.3505
36.7214	23.8675	40.4792	23.094
36.1931	24.048	44.4741	26.7407
35.0565	25.2084	35.1788	24.3225
37.5112	27.4453	41.2902	25.3995
33.375	24.1851	40.247	23.3263
40.5516	32.7806	39.0452	21.4417
33.6241	27.516	41.5185	22.5232
38.7553	26.7263	41.8476	26.9749
36.9834	18.9171	38.0655	35.4885
35.9861	22.1635	39.5892	39.1357
42.4578	26.5727	45.9934	23.8927
46.1598	29.7075	50.426	25.4688
40.9828	24.552	58.297	43.6302
42.7994	24.9143	38.5675	25.1902
35.1295	17.8	42.1018	24.6442
29.1622	23.009	36.2402	26.4214
32.5391	24.3047	33.9276	30.2353
30.2005	24.6297	41.6914	36.7131
39.8998	22.7115	36.3553	30.1101
55.178	25.3336	32.9738	28.2604
29.8613	21.989	46.7343	27.1102
40.0266	18.7113	31.0348	32.5821
39.5015	36.9429	39.6629	31.5115
47.5285	20.5269	31.4638	24.4821
39.6291	21.264	34.0583	28.4669
40.0225	29.1727	35.6606	23.9057
42.2888	26.6373	33.8847	36.6
37.0287	28.7779	33.3445	32.8355
40.595	32.4662	32.5738	43.7003
44.208	27.5105	32.2779	34.007
49.8094	26.0816	33.2166	33.1669
34.3979	23.4184	29.5499	36.4843
41.5533	36.6335	46.0403	32.5432
36.8882	28.8981	35.2876	40.1389
33.7215	23.2966	37.3822	44.4047
34.6826	26.245	34.6409	33.7842
39.0664	52.0154	28.5902	27.9715
34.5523	25.9667	30.6093	28.0852
34.9733	24.8323	34.232	24.7565
35.9516	27.1451	36.7126	24.2594
33.8828	25.2374	33.6748	27.8117
39.7108	30.8516	32.1458	31.2083
35.7829	26.267	25.4693	29.5841
35.0394	27.7998	39.8444	22.4768
36.0026	27.5015	31.2059	33.9768
46.6978	32.7063	34.9154	29.591
41.3813	33.8107	90.6085	29.4926
40.5214	32.3964	38.8704	24.3906
39.9301	30.5397	38.7105	28.1235
40.8461	30.2151	82.1506	29.3092
33.4293	30.9256	36.475	36.9396
31.5181	31.9725	49.2153	26.5807
40.5101	29.8956	42.0408	25.0938
34.6969	32.5019	49.3256	26.745
34.5175	30.7045	33.3035	29.5598
32.3387	33.2877	35.2069	26.8847
37.5404	32.2104	48.1442	27.5182
36.6012	42.5753	45.7574	30.5819
40.5513	28.7097	39.679	26.4189
35.6946	29.8686	41.7832	26.7889
35.9736	25.6806	46.3457	30.5777
36.6232	28.8287	39.8219	28.0336
39.589	37.9559	39.3068	28.1396
39.819	31.0036	46.4707	28.9167
41.0032	26.3079	37.7448	28.9274
34.826	28.8511	41.0032	32.8432
37.3502	29.8807	35.2789	28.0799
41.5006	27.5472	43.0935	25.1071
39.0999	37.4672	39.9477	27.9316
37.6603	40.3167	41.0526	26.8042
40.3269	31.317	47.0846	24.9377
44.9852	48.0698	47.3725	27.7797
37.7579	35.2822	42.2125	30.1898
[truncated: 12,965 more rows]
[truncated: 16 more columns]

## Sheet: Fig. 2k
empty DMSO			sgRNA DMSO			empty THZ1 0,1uM			sgRNA THZ1 0,1uM			empty THZ1 1uM			sgRNA THZ1 1uM			empty THZ531			sgRNA THZ531			empty THAL			sgRNA THAL			empty NPV2			sgRNA NPV2			empty DRB			sgRNA DRB
3.69448	4.66258	3.68609	40.7745	33.855	31.2442	2.80851	3.50438	3.32951	24.6787	20.1919	27.6541	2.24852	3.57143	2.78731	21.3864	16.8831	14.6715	0.503525	1.18629	1.42159	15.2653	17.7979	19.7133	3.19686	4.06386	1.82959	3.8822	17.5602	18.3352	1.92593	1.21325	1.38078	7.50481	5.26316	10.7167	2.10145	0.764951	1.02171	4.81844	4.43081	3.93175
Number of families	1
Number of comparisons per family	91
Alpha	0.05
Tukey's multiple comparisons test	Mean Diff,	95,00% CI of diff,	Below threshold?	Summary	Adjusted P Value
empty DMSO vs. sgRNA DMSO	-31.28	-40,45 to -22,10	Yes	****	<0,0001	A-B
empty DMSO vs. empty THZ1 0,1uM	0.8002	-8,373 to 9,973	No	ns	>0,9999	A-C
empty DMSO vs. sgRNA THZ1 0,1uM	-20.16	-29,33 to -10,99	Yes	****	<0,0001	A-D
empty DMSO vs. empty THZ1 1uM	1.145	-8,028 to 10,32	No	ns	>0,9999	A-E
empty DMSO vs. sgRNA THZ1 1uM	-13.63	-22,81 to -4,459	Yes	***	0.0006	A-F
empty DMSO vs. empty THZ531	2.977	-6,196 to 12,15	No	ns	0.9935	A-G
empty DMSO vs. sgRNA THZ531	-13.58	-22,75 to -4,405	Yes	***	0.0006	A-H
empty DMSO vs. empty THAL	0.9843	-8,189 to 10,16	No	ns	>0,9999	A-I
empty DMSO vs. sgRNA THAL	-9.245	-18,42 to -0,07160	Yes	*	0.0469	A-J
empty DMSO vs. empty NPV2	2.508	-6,665 to 11,68	No	ns	0.9987	A-K
empty DMSO vs. sgRNA NPV2	-3.814	-12,99 to 5,359	No	ns	0.9517	A-L
empty DMSO vs. empty DRB	2.718	-6,455 to 11,89	No	ns	0.9972	A-M
empty DMSO vs. sgRNA DRB	-0.3793	-9,552 to 8,794	No	ns	>0,9999	A-N
sgRNA DMSO vs. empty THZ1 0,1uM	32.08	22,90 to 41,25	Yes	****	<0,0001	B-C
sgRNA DMSO vs. sgRNA THZ1 0,1uM	11.12	1,943 to 20,29	Yes	**	0.0078	B-D
sgRNA DMSO vs. empty THZ1 1uM	32.42	23,25 to 41,60	Yes	****	<0,0001	B-E
sgRNA DMSO vs. sgRNA THZ1 1uM	17.64	8,471 to 26,82	Yes	****	<0,0001	B-F
sgRNA DMSO vs. empty THZ531	34.25	25,08 to 43,43	Yes	****	<0,0001	B-G
sgRNA DMSO vs. sgRNA THZ531	17.7	8,526 to 26,87	Yes	****	<0,0001	B-H
sgRNA DMSO vs. empty THAL	32.26	23,09 to 41,43	Yes	****	<0,0001	B-I
sgRNA DMSO vs. sgRNA THAL	22.03	12,86 to 31,21	Yes	****	<0,0001	B-J
sgRNA DMSO vs. empty NPV2	33.78	24,61 to 42,96	Yes	****	<0,0001	B-K
sgRNA DMSO vs. sgRNA NPV2	27.46	18,29 to 36,64	Yes	****	<0,0001	B-L
sgRNA DMSO vs. empty DRB	34	24,82 to 43,17	Yes	****	<0,0001	B-M
sgRNA DMSO vs. sgRNA DRB	30.9	21,72 to 40,07	Yes	****	<0,0001	B-N
empty THZ1 0,1uM vs. sgRNA THZ1 0,1uM	-20.96	-30,13 to -11,79	Yes	****	<0,0001	C-D
empty THZ1 0,1uM vs. empty THZ1 1uM	0.345	-8,828 to 9,518	No	ns	>0,9999	C-E
empty THZ1 0,1uM vs. sgRNA THZ1 1uM	-14.43	-23,61 to -5,260	Yes	***	0.0003	C-F
empty THZ1 0,1uM vs. empty THZ531	2.177	-6,996 to 11,35	No	ns	0.9997	C-G
empty THZ1 0,1uM vs. sgRNA THZ531	-14.38	-23,55 to -5,205	Yes	***	0.0003	C-H
empty THZ1 0,1uM vs. empty THAL	0.184	-8,989 to 9,357	No	ns	>0,9999	C-I
empty THZ1 0,1uM vs. sgRNA THAL	-10.05	-19,22 to -0,8718	Yes	*	0.0222	C-J
empty THZ1 0,1uM vs. empty NPV2	1.707	-7,466 to 10,88	No	ns	>0,9999	C-K
empty THZ1 0,1uM vs. sgRNA NPV2	-4.614	-13,79 to 4,559	No	ns	0.8393	C-L
empty THZ1 0,1uM vs. empty DRB	1.918	-7,255 to 11,09	No	ns	>0,9999	C-M
empty THZ1 0,1uM vs. sgRNA DRB	-1.18	-10,35 to 7,994	No	ns	>0,9999	C-N
sgRNA THZ1 0,1uM vs. empty THZ1 1uM	21.31	12,13 to 30,48	Yes	****	<0,0001	D-E
sgRNA THZ1 0,1uM vs. sgRNA THZ1 1uM	6.528	-2,645 to 15,70	No	ns	0.3805	D-F
sgRNA THZ1 0,1uM vs. empty THZ531	23.14	13,96 to 32,31	Yes	****	<0,0001	D-G
sgRNA THZ1 0,1uM vs. sgRNA THZ531	6.583	-2,590 to 15,76	No	ns	0.3683	D-H
sgRNA THZ1 0,1uM vs. empty THAL	21.14	11,97 to 30,32	Yes	****	<0,0001	D-I
sgRNA THZ1 0,1uM vs. sgRNA THAL	10.92	1,742 to 20,09	Yes	**	0.0095	D-J
sgRNA THZ1 0,1uM vs. empty NPV2	22.67	13,50 to 31,84	Yes	****	<0,0001	D-K
sgRNA THZ1 0,1uM vs. sgRNA NPV2	16.35	7,173 to 25,52	Yes	****	<0,0001	D-L
sgRNA THZ1 0,1uM vs. empty DRB	22.88	13,71 to 32,05	Yes	****	<0,0001	D-M
sgRNA THZ1 0,1uM vs. sgRNA DRB	19.78	10,61 to 28,95	Yes	****	<0,0001	D-N
empty THZ1 1uM vs. sgRNA THZ1 1uM	-14.78	-23,95 to -5,605	Yes	***	0.0002	E-F
empty THZ1 1uM vs. empty THZ531	1.832	-7,341 to 11,01	No	ns	>0,9999	E-G
empty THZ1 1uM vs. sgRNA THZ531	-14.72	-23,90 to -5,550	Yes	***	0.0002	E-H
empty THZ1 1uM vs. empty THAL	-0.161	-9,334 to 9,012	No	ns	>0,9999	E-I
empty THZ1 1uM vs. sgRNA THAL	-10.39	-19,56 to -1,217	Yes	*	0.0159	E-J
empty THZ1 1uM vs. empty NPV2	1.362	-7,811 to 10,54	No	ns	>0,9999	E-K
empty THZ1 1uM vs. sgRNA NPV2	-4.959	-14,13 to 4,214	No	ns	0.7673	E-L
empty THZ1 1uM vs. empty DRB	1.573	-7,600 to 10,75	No	ns	>0,9999	E-M
empty THZ1 1uM vs. sgRNA DRB	-1.525	-10,70 to 7,649	No	ns	>0,9999	E-N
sgRNA THZ1 1uM vs. empty THZ531	16.61	7,437 to 25,78	Yes	****	<0,0001	F-G
sgRNA THZ1 1uM vs. sgRNA THZ531	0.05487	-9,118 to 9,228	No	ns	>0,9999	F-H
sgRNA THZ1 1uM vs. empty THAL	14.62	5,444 to 23,79	Yes	***	0.0002	F-I
sgRNA THZ1 1uM vs. sgRNA THAL	4.388	-4,785 to 13,56	No	ns	0.8794	F-J
sgRNA THZ1 1uM vs. empty NPV2	16.14	6,967 to 25,31	Yes	****	<0,0001	F-K
sgRNA THZ1 1uM vs. sgRNA NPV2	9.819	0,6456 to 18,99	Yes	*	0.0275	F-L
sgRNA THZ1 1uM vs. empty DRB	16.35	7,178 to 25,52	Yes	****	<0,0001	F-M
sgRNA THZ1 1uM vs. sgRNA DRB	13.25	4,080 to 22,43	Yes	***	0.0009	F-N
empty THZ531 vs. sgRNA THZ531	-16.56	-25,73 to -7,382	Yes	****	<0,0001	G-H
empty THZ531 vs. empty THAL	-1.993	-11,17 to 7,180	No	ns	0.9999	G-I
empty THZ531 vs. sgRNA THAL	-12.22	-21,40 to -3,049	Yes	**	0.0025	G-J
empty THZ531 vs. empty NPV2	-0.4695	-9,643 to 8,704	No	ns	>0,9999	G-K
empty THZ531 vs. sgRNA NPV2	-6.791	-15,96 to 2,382	No	ns	0.3239	G-L
empty THZ531 vs. empty DRB	-0.2589	-9,432 to 8,914	No	ns	>0,9999	G-M
empty THZ531 vs. sgRNA DRB	-3.357	-12,53 to 5,817	No	ns	0.9818	G-N
sgRNA THZ531 vs. empty THAL	14.56	5,389 to 23,74	Yes	***	0.0002	H-I
sgRNA THZ531 vs. sgRNA THAL	4.333	-4,840 to 13,51	No	ns	0.8881	H-J
sgRNA THZ531 vs. empty NPV2	16.09	6,912 to 25,26	Yes	****	<0,0001	H-K
sgRNA THZ531 vs. sgRNA NPV2	9.764	0,5907 to 18,94	Yes	*	0.029	H-L
sgRNA THZ531 vs. empty DRB	16.3	7,123 to 25,47	Yes	****	<0,0001	H-M
sgRNA THZ531 vs. sgRNA DRB	13.2	4,025 to 22,37	Yes	***	0.0009	H-N
empty THAL vs. sgRNA THAL	-10.23	-19,40 to -1,056	Yes	*	0.0186	I-J
empty THAL vs. empty NPV2	1.523	-7,650 to 10,70	No	ns	>0,9999	I-K
empty THAL vs. sgRNA NPV2	-4.798	-13,97 to 4,375	No	ns	0.8024	I-L
empty THAL vs. empty DRB	1.734	-7,439 to 10,91	No	ns	>0,9999	I-M
empty THAL vs. sgRNA DRB	-1.364	-10,54 to 7,810	No	ns	>0,9999	I-N
sgRNA THAL vs. empty NPV2	11.75	2,579 to 20,93	Yes	**	0.0041	J-K
sgRNA THAL vs. sgRNA NPV2	5.431	-3,742 to 14,60	No	ns	0.6532	J-L
sgRNA THAL vs. empty DRB	11.96	2,790 to 21,14	Yes	**	0.0033	J-M
sgRNA THAL vs. sgRNA DRB	8.866	-0,3077 to 18,04	No	ns	0.0658	J-N
empty NPV2 vs. sgRNA NPV2	-6.322	-15,49 to 2,852	No	ns	0.4283	K-L
empty NPV2 vs. empty DRB	0.2106	-8,963 to 9,384	No	ns	>0,9999	K-M
empty NPV2 vs. sgRNA DRB	-2.887	-12,06 to 6,286	No	ns	0.995	K-N
sgRNA NPV2 vs. empty DRB	6.532	-2,641 to 15,71	No	ns	0.3796	L-M
sgRNA NPV2 vs. sgRNA DRB	3.435	-5,739 to 12,61	No	ns	0.9781	L-N
empty DRB vs. sgRNA DRB	-3.098	-12,27 to 6,076	No	ns	0.9907	M-N
Test details	Mean 1	Mean 2	Mean Diff,	SE of diff,	n1	n2
empty DMSO vs. sgRNA DMSO	4.014	35.29	-31.28	2.506	3	3
empty DMSO vs. empty THZ1 0,1uM	4.014	3.214	0.8002	2.506	3	3
empty DMSO vs. sgRNA THZ1 0,1uM	4.014	24.17	-20.16	2.506	3	3
empty DMSO vs. empty THZ1 1uM	4.014	2.869	1.145	2.506	3	3
empty DMSO vs. sgRNA THZ1 1uM	4.014	17.65	-13.63	2.506	3	3
empty DMSO vs. empty THZ531	4.014	1.037	2.977	2.506	3	3
empty DMSO vs. sgRNA THZ531	4.014	17.59	-13.58	2.506	3	3
empty DMSO vs. empty THAL	4.014	3.03	0.9843	2.506	3	3
empty DMSO vs. sgRNA THAL	4.014	13.26	-9.245	2.506	3	3
empty DMSO vs. empty NPV2	4.014	1.507	2.508	2.506	3	3
empty DMSO vs. sgRNA NPV2	4.014	7.828	-3.814	2.506	3	3
empty DMSO vs. empty DRB	4.014	1.296	2.718	2.506	3	3
empty DMSO vs. sgRNA DRB	4.014	4.394	-0.3793	2.506	3	3
sgRNA DMSO vs. empty THZ1 0,1uM	35.29	3.214	32.08	2.506	3	3
sgRNA DMSO vs. sgRNA THZ1 0,1uM	35.29	24.17	11.12	2.506	3	3
sgRNA DMSO vs. empty THZ1 1uM	35.29	2.869	32.42	2.506	3	3
sgRNA DMSO vs. sgRNA THZ1 1uM	35.29	17.65	17.64	2.506	3	3
sgRNA DMSO vs. empty THZ531	35.29	1.037	34.25	2.506	3	3
sgRNA DMSO vs. sgRNA THZ531	35.29	17.59	17.7	2.506	3	3
sgRNA DMSO vs. empty THAL	35.29	3.03	32.26	2.506	3	3
sgRNA DMSO vs. sgRNA THAL	35.29	13.26	22.03	2.506	3	3
sgRNA DMSO vs. empty NPV2	35.29	1.507	33.78	2.506	3	3
sgRNA DMSO vs. sgRNA NPV2	35.29	7.828	27.46	2.506	3	3
sgRNA DMSO vs. empty DRB	35.29	1.296	34	2.506	3	3
sgRNA DMSO vs. sgRNA DRB	35.29	4.394	30.9	2.506	3	3
empty THZ1 0,1uM vs. sgRNA THZ1 0,1uM	3.214	24.17	-20.96	2.506	3	3
empty THZ1 0,1uM vs. empty THZ1 1uM	3.214	2.869	0.345	2.506	3	3
empty THZ1 0,1uM vs. sgRNA THZ1 1uM	3.214	17.65	-14.43	2.506	3	3
empty THZ1 0,1uM vs. empty THZ531	3.214	1.037	2.177	2.506	3	3
empty THZ1 0,1uM vs. sgRNA THZ531	3.214	17.59	-14.38	2.506	3	3
empty THZ1 0,1uM vs. empty THAL	3.214	3.03	0.184	2.506	3	3
empty THZ1 0,1uM vs. sgRNA THAL	3.214	13.26	-10.05	2.506	3	3
empty THZ1 0,1uM vs. empty NPV2	3.214	1.507	1.707	2.506	3	3
empty THZ1 0,1uM vs. sgRNA NPV2	3.214	7.828	-4.614	2.506	3	3
empty THZ1 0,1uM vs. empty DRB	3.214	1.296	1.918	2.506	3	3
empty THZ1 0,1uM vs. sgRNA DRB	3.214	4.394	-1.18	2.506	3	3
sgRNA THZ1 0,1uM vs. empty THZ1 1uM	24.17	2.869	21.31	2.506	3	3
sgRNA THZ1 0,1uM vs. sgRNA THZ1 1uM	24.17	17.65	6.528	2.506	3	3
sgRNA THZ1 0,1uM vs. empty THZ531	24.17	1.037	23.14	2.506	3	3
sgRNA THZ1 0,1uM vs. sgRNA THZ531	24.17	17.59	6.583	2.506	3	3
sgRNA THZ1 0,1uM vs. empty THAL	24.17	3.03	21.14	2.506	3	3
sgRNA THZ1 0,1uM vs. sgRNA THAL	24.17	13.26	10.92	2.506	3	3
sgRNA THZ1 0,1uM vs. empty NPV2	24.17	1.507	22.67	2.506	3	3
sgRNA THZ1 0,1uM vs. sgRNA NPV2	24.17	7.828	16.35	2.506	3	3
sgRNA THZ1 0,1uM vs. empty DRB	24.17	1.296	22.88	2.506	3	3
sgRNA THZ1 0,1uM vs. sgRNA DRB	24.17	4.394	19.78	2.506	3	3
empty THZ1 1uM vs. sgRNA THZ1 1uM	2.869	17.65	-14.78	2.506	3	3
empty THZ1 1uM vs. empty THZ531	2.869	1.037	1.832	2.506	3	3
empty THZ1 1uM vs. sgRNA THZ531	2.869	17.59	-14.72	2.506	3	3
empty THZ1 1uM vs. empty THAL	2.869	3.03	-0.161	2.506	3	3
empty THZ1 1uM vs. sgRNA THAL	2.869	13.26	-10.39	2.506	3	3
empty THZ1 1uM vs. empty NPV2	2.869	1.507	1.362	2.506	3	3
empty THZ1 1uM vs. sgRNA NPV2	2.869	7.828	-4.959	2.506	3	3
empty THZ1 1uM vs. empty DRB	2.869	1.296	1.573	2.506	3	3
empty THZ1 1uM vs. sgRNA DRB	2.869	4.394	-1.525	2.506	3	3
sgRNA THZ1 1uM vs. empty THZ531	17.65	1.037	16.61	2.506	3	3
sgRNA THZ1 1uM vs. sgRNA THZ531	17.65	17.59	0.05487	2.506	3	3
sgRNA THZ1 1uM vs. empty THAL	17.65	3.03	14.62	2.506	3	3
sgRNA THZ1 1uM vs. sgRNA THAL	17.65	13.26	4.388	2.506	3	3
sgRNA THZ1 1uM vs. empty NPV2	17.65	1.507	16.14	2.506	3	3
sgRNA THZ1 1uM vs. sgRNA NPV2	17.65	7.828	9.819	2.506	3	3
sgRNA THZ1 1uM vs. empty DRB	17.65	1.296	16.35	2.506	3	3
sgRNA THZ1 1uM vs. sgRNA DRB	17.65	4.394	13.25	2.506	3	3
empty THZ531 vs. sgRNA THZ531	1.037	17.59	-16.56	2.506	3	3
empty THZ531 vs. empty THAL	1.037	3.03	-1.993	2.506	3	3
empty THZ531 vs. sgRNA THAL	1.037	13.26	-12.22	2.506	3	3
empty THZ531 vs. empty NPV2	1.037	1.507	-0.4695	2.506	3	3
empty THZ531 vs. sgRNA NPV2	1.037	7.828	-6.791	2.506	3	3
empty THZ531 vs. empty DRB	1.037	1.296	-0.2589	2.506	3	3
empty THZ531 vs. sgRNA DRB	1.037	4.394	-3.357	2.506	3	3
sgRNA THZ531 vs. empty THAL	17.59	3.03	14.56	2.506	3	3
sgRNA THZ531 vs. sgRNA THAL	17.59	13.26	4.333	2.506	3	3
sgRNA THZ531 vs. empty NPV2	17.59	1.507	16.09	2.506	3	3
sgRNA THZ531 vs. sgRNA NPV2	17.59	7.828	9.764	2.506	3	3
sgRNA THZ531 vs. empty DRB	17.59	1.296	16.3	2.506	3	3
sgRNA THZ531 vs. sgRNA DRB	17.59	4.394	13.2	2.506	3	3
empty THAL vs. sgRNA THAL	3.03	13.26	-10.23	2.506	3	3
empty THAL vs. empty NPV2	3.03	1.507	1.523	2.506	3	3
empty THAL vs. sgRNA NPV2	3.03	7.828	-4.798	2.506	3	3
empty THAL vs. empty DRB	3.03	1.296	1.734	2.506	3	3
empty THAL vs. sgRNA DRB	3.03	4.394	-1.364	2.506	3	3
sgRNA THAL vs. empty NPV2	13.26	1.507	11.75	2.506	3	3
sgRNA THAL vs. sgRNA NPV2	13.26	7.828	5.431	2.506	3	3
sgRNA THAL vs. empty DRB	13.26	1.296	11.96	2.506	3	3
sgRNA THAL vs. sgRNA DRB	13.26	4.394	8.866	2.506	3	3
empty NPV2 vs. sgRNA NPV2	1.507	7.828	-6.322	2.506	3	3
empty NPV2 vs. empty DRB	1.507	1.296	0.2106	2.506	3	3
empty NPV2 vs. sgRNA DRB	1.507	4.394	-2.887	2.506	3	3
sgRNA NPV2 vs. empty DRB	7.828	1.296	6.532	2.506	3	3
sgRNA NPV2 vs. sgRNA DRB	7.828	4.394	3.435	2.506	3	3
empty DRB vs. sgRNA DRB	1.296	4.394	-3.098	2.506	3	3

## Sheet: Fig. 2l
DMSO empty			DMSO sgRNA			THZ1 0,1uM empty			THZ1 0,1uM sgRNA			THZ1 1uM empty			THZ1 1uM sgRNA			TZH531 empty			THZ531 sgRNA			THAL SNS032 empty			THAL SNS032 sgRNA			NPV2 empty			NPV2 sgRNA			DRB empty			DRB sgRNA
1	1	1	7	6	4	1	1	1	1	1	1	1	1	1	3	1	2	1	1	1	3	4	1	1	1	1	2	2	7	1	1	1	4	3	1	3	3	1	5	5	3
2	1	1	6	11	9	1	1	3	11	3	6	1	2	1	3	3	6	1	2	1	4	13	1	1	1	1	1	3	3	1	1	1	6	1	1	2	1	1	1	1	1
4	1	2	8	1	6	1	1	1	2	1	7	1	1	1	1	6	1	1	1	1	8	3	5	1	1	1	2	1	4	1	1	1	7	4	1	1	1	1	1	1	4
1	1	1	1	4	5	2	1	1	3	1	5	3	1	2	2	1	7	2	1	3	4	3	5	2	1	1	1	2	2	1	2	1	1	1	2	1	1	1	1	1	3
5	1	1	5	7	6	1	1	1	6	10	1	2	1	2	7	1	5	2	1	1	7	9	6	5	2	2	1	2	8	2	1	1	1	5	2	1	1	1	1	1	5
2	2	1	4	5	3	2	1	1	7	8	4	1	2	1	3	1	3	1	1	1	1	1	5	1	5	5	1	3	1	1	1	25	1	8	3	1	4	1	1	1	1
1	1	1	1	10	6	1	1	1	6	12	1	1	1	1	3	5	1	1	1	1	4	4	3	1	1	1	4	4	3	1	3	1	1	2	1	1	1	2	5	5	1
1	2	1	9	3	1	2	1	1	2	13	1	1	1	1	6	10	4	1	1	1	2	2	13	1	1	1	2	2	4	1	1	1	5	4	4	1	2	1	1	1	2
1	1	1	4	7	1	2	1	1	1	3	7	1	1	1	2	3	5	1	2	1	2	2	3	1	1	1	1	7	1	1	1	2	8	7	1	2	1	1	2	2	1
1	3	3	6	1	5	1	1	1	14	1	2	1	2	1	1	4	5	1	1	1	1	2	6	4	2	2	1	5	8	1	1	1	6	1	1	1	1	1	1	1	5
2	2	1	6	4	8	1	1	1	7	1	9	1	2	1	5	2	1	1	1	1	2	1	7	1	1	1	3	1	1	8	1	1	1	3	1	1	1	1	1	1	2
1	2	1	8	10	3	1	1	1	7	1	1	1	1	1	1	1	2	1	1	1	1	1	1	2	1	1	1	8	5	2	1	2	1	1	4	1	1	1	1	1	6
5	1	1	1	4	1	1	1	4	4	5	4	1	2	1	1	2	2	1	1	1	5	5	1	2	1	1	1	6	2	1	1	1	1	1	2	1	1	1	1	1	1
1	1	1	9	6	4	1	1	1	2	9	4	1	1	1	5	3	1	1	2	1	1	1	1	1	1	1	1	1	2	1	1	1	1	3	1	1	1	1	7	7	7
3	1	1	8	7	3	1	1	1	2	3	8	2	5	2	1	6	2	1	1	1	4	1	1	1	1	1	12	3	1	1	1	1	1	1	3	1	1	1	3	3	1
1	1	1	4	4	19	1	1	1	2	1	12	1	2	1	2	2	2	1	1	1	3	10	4	5	2	2	6	1	5	1	1	2	3	1	1	2	1	1	3	3	1
4	1	1	9	4	2	1	2	2	4	1	8	3	1	1	6	6	2	1	1	1	3	7	7	2	1	1	2	6	1	1	2	1	1	1	3	1	2	1	1	1	6
1	2	1	2	2	1	1	1	1	6	1	2	1	3	1	1	1	1	1	3	1	14	2	7	2	1	1	1	2	5	1	1	1	1	1	6	1	1	1	1	1	2
1	1	1	7	4	2	1	1	1	24	8	1	4	1	1	3	2	6	1	1	1	4	3	2	2	1	1	4	8	1	1	1	1	2	2	5	2	1	1	7	7	1
1	1	1	15	1	3	1	2	1	1	1	1	2	2	1	1	3	2	1	1	1	6	1	2	1	2	2	2	4	1	1	3	1	2	3	9	1	1	1	3	3	2
1	1	1	8	5	3	1	3	1	9	3	5	1	1	1	5	1	9	1	1	1	1	1	2	1	2	2	2	1	1	1	1	1	2	2	4	1	1	1	5	5	1
1	2	1	5	4	6	2	1	2	11	7	1	2	2	4	7	3	4	1	3	1	6	5	6	1	1	1	1	4	4	1	1	1	3	1	1	1	1	1	4	4	1
2	1	1	11	2	3	1	2	1	1	8	1	1	1	2	1	2	1	2	2	1	7	3	3	3	1	1	2	2	5	1	1	1	1	1	2	1	1	1	2	2	1
1	1	1	6	4	3	1	1	1	3	1	5	1	2	1	1	1	3	1	1	1	3	6	1	2	1	1	5	2	2	1	1	1	1	2	1	1	1	3	2	2	2
2	1	1	3	10	7	1	1	1	5	4	9	3	2	1	1	3	4	1	1	1	1	11	2	1	3	3	5	4	1	1	1	2	4	1	2	1	1	1	2	2	2
1	2	1	2	2	6	2	1	1	1	2	6	2	1	1	1	3	6	1	1	2	5	3	7	1	1	1	2	1	1	1	1	1	2	1	7	2	1	1	1	1	1
1	1	2	10	3	10	1	1	2	2	1	1	1	3	4	2	8	1	1	2	1	6	1	1	1	1	1	4	2	1	3	1	1	3	1	1	1	1	2	1	1	1
2	2	1	5	10	4	1	1	1	1	1	6	1	1	1	9	4	1	1	2	3	4	8	5	1	2	2	3	1	1	1	1	1	6	3	1	2	1	3	3	3	5
2	3	1	2	8	2	1	2	1	3	1	1	1	1	2	6	1	3	2	1	1	2	8	3	1	1	1	2	2	1	1	1	1	3	8	1	1	1	1	2	2	2
2	3	1	2	7	6	1	2	1	6	1	6	1	1	1	1	1	6	1	1	9	3	6	6	1	2	2	1	1	2	1	1	1	7	1	1	1	1	2	1	1	6
1	1	3	9	8	1	1	1	1	7	4	2	1	1	1	1	1	1	1	1	1	6	7	2	1	2	2	4	3	1	1	1	1	3	1	3	1	1	1	3	3	1
1	1	1	1	2	7	1	2	1	2	2	3	1	1	1	1	1	3	1	1	1	4	1	3	2	3	3	5	2	3	2	1	1	5	2	11	1	2	2	1	1	2
1	1	1	6	6	3	1	1	1	1	1	1	1	1	3	4	1	2	2	2	1	5	1	20	2	1	1	1	2	11	2	1	1	4	3	2	1	1	1	1	1	1
1	1	1	7	3	1	1	1	1	9	6	1	1	1	1	2	4	3	1	2	2	4	3	2	3	1	1	6	4	5	1	16	1	3	1	1	1	1	1	2	2	1
1	1	2	6	8	5	1	1	3	10	1	2	1	1	1	2	1	3	1	1	2	6	10	2	1	1	1	3	4	2	1	1	2	1	2	6	1	1	1	2	2	1				Number of families	1
1	1	1	2	4	5	1	1	2	2	5	4	1	2	1	1	2	3	1	1	1	1	4	1	1	1	1	1	2	3	1	2	1	6	5	1	1	1	1	1	1	2				Number of comparisons per family	91
1	1	2	6	1	8	2	3	2	6	7	6	1	2	2	1	3	5	1	1	1	10	5	3	1	1	1	7	5	1	1	2	2	5	1	3	1	1	2	5	5	1				Alpha	0.05
1	2	1	7	3	10	2	2	4	2	3	6	1	2	1	1	2	5	1	1	1	1	1	5	2	1	1	2	5	3	1	1	3	3	1	2	1	1	1	1	1	4
1	8	1	6	6	6	1	1	1	4	9	11	1	1	1	2	3	3	1	1	1	6	1	6	1	1	1	1	2	3	1	1	1	1	2	1	2	1	1	1	1	4				Tukey's multiple comparisons test	Mean Diff,	95,00% CI of diff,	Below threshold?	Summary
1	1	1	7	6	2	2	2	1	8	2	2	1	3	1	9	1	6	1	1	1	2	2	3	1	1	1	7	5	1	1	1	1	3	1	4	1	1	1	3	3	1				DMSO empty vs. DMSO sgRNA	-3.029	-3,337 to -2,722	Yes	****
1	1	1	5	15	12	2	2	1	1	1	2	1	1	1	8	8	7	1	1	1	2	4	7	1	2	2	1	5	1	1	1	1	1	1	1	1	2	1	1	1	1				DMSO empty vs. THZ1 0,1uM empty	0.05349	-0,3332 to 0,4402	No	ns
1	1	1	3	7	5	1	1	1	3	4	1	1	1	3	8	5	6	1	1	1	2	3	3	1	1	1	1	2	1	2	8	1	1	2	1	2	1	1	5	5	1				DMSO empty vs. THZ1 0,1uM sgRNA	-2.648	-2,967 to -2,329	Yes	****
1	1	1	6	9	7	2	2	2	2	1	4	1	2	1	1	7	1	1	1	1	4	10	6	1	2	2	2	1	2	1	1	1	3	1	1	1	1	1	1	1	1				DMSO empty vs. THZ1 1uM empty	0.01071	-0,4027 to 0,4241	No	ns
2	2	1	4	12	10	1	5	1	1	5	2	1	1	1	5	2	1	1	1	1	2	2	4	1	2	2	5	8	3	1	1	1	6	1	2	1	1	1	4	4	1				DMSO empty vs. THZ1 1uM sgRNA	-1.954	-2,294 to -1,615	Yes	****
1	1	2	2	3	1	1	1	2	11	4	4	1	2	1	1	6	7	1	1	1	4	9	2	1	2	2	2	1	6	1	1	1	2	4	3	1	1	1	3	3	1				DMSO empty vs. TZH531 empty	0.1912	-0,2839 to 0,6664	No	ns
1	3	1	6	1	7	1	1	3	3	3	3	1	1	2	8	9	3	1	1	1	10	11	1	2	1	1	1	2	10	1	1	1	3	1	5	1	1	1	2	2	1				DMSO empty vs. THZ531 sgRNA	-1.944	-2,293 to -1,594	Yes	****
3	1	2	8	11	7	4	9	1	7	1	2	1	1	1	1	3	1	1	1	1	3	1	6	1	1	1	1	1	1	2	1	1	1	2	5	1	1	1	1	1	1				DMSO empty vs. THAL SNS032 empty	-0.03614	-0,4462 to 0,3739	No	ns
1	1	2	1	9	1	1	1	1	1	4	1	2	1	1	2	7	2	1	1	1	2	3	6	1	1	1	1	1	1	1	1	1	1	6	4	1	1	1	1	1	1				DMSO empty vs. THAL SNS032 sgRNA	-1.684	-2,042 to -1,326	Yes	****
1	3	1	1	3	2	1	1	1	1	2	2	1	1	2	9	2	6	1	1	4	5	3	4	1	1	1	7	2	1	1	1	1	6	3	3	1	1	1	5	5	1				DMSO empty vs. NPV2 empty	0.07741	-0,4217 to 0,5765	No	ns
1	1	1	3	1	5	1	1	2	3	1	5	1	1	1	6	5	2	1	1	1	1	1	2	1	1	1	1	1	2	1	1	1	5	1	3	1	1	2	3	3	1				DMSO empty vs. NPV2 sgRNA	-1.129	-1,552 to -0,7055	Yes	****
1	2	1	8	10	8	1	1	1	2	6	6	1	1	19	8	2	1	1	1	1	1	1	3	1	4	4	5	4	1	1	1	2	1	2	5	1	3	1	1	1	1				DMSO empty vs. DRB empty	0.1776	-0,4237 to 0,7790	No	ns
1	3	1	4	11	2	1	1	1	6	7	2	1	1	1	1	6	1	1	1	1	1	1	3	1	1	1	1	6	2	1	1	1	5	2	5	1	1	1	1	1	10				DMSO empty vs. DRB sgRNA	-0.8066	-1,319 to -0,2945	Yes	****
1	1	5	3	12	6	1	2	1	3	1	3	1	1	1	4	3	3	1	1	1	4	5	10	1	1	1	7	4	6	1	1	2	2	1	7	1	2	1	1	1	1				DMSO sgRNA vs. THZ1 0,1uM empty	3.083	2,758 to 3,408	Yes	****
1	1	1	4	6	1	1	2	1	4	1	1	1	2	1	5	1	10	1	1	1	1	4	1	1	1	1	1	1	1	1	1	1	3	3	8	1	1	2	4	4	4				DMSO sgRNA vs. THZ1 0,1uM sgRNA	0.3817	0,1414 to 0,6220	Yes	****
1	1	3	5	1	5	1	1	3	2	1	3	1	1	1	9	2	1	6	1	1	1	1	4	1	1	1	1	1	3	1	1	2	6	1	5	1	1	3	1	1	1				DMSO sgRNA vs. THZ1 1uM empty	3.04	2,684 to 3,396	Yes	****
1	1	1	4	1	7	1	1	3	4	8	1	2	1	1	5	7	1	1	1	1	1	4	4	1	1	1	1	1	1	3	1	2	4	5	1	1	1	1	2	2	1				DMSO sgRNA vs. THZ1 1uM sgRNA	1.075	0,8085 to 1,342	Yes	****
1	1	1	2	2	2	1	1	1	3	2	7	1	1	1	3	2	1	2	1	1	3	3	5	1	2	2	2	4	9	1	1	1	1	1	2	1	1	2	1	1	2				DMSO sgRNA vs. TZH531 empty	3.221	2,794 to 3,647	Yes	****
3	2	1	5	8	6	1	1	2	3	8	6	1	1	1	1	7	4	1	2	1	2	1	9	1	1	1	2	2	1	2	1	1	6	1	2	3	1	2	1	1	1				DMSO sgRNA vs. THZ531 sgRNA	1.086	0,8064 to 1,365	Yes	****
1	5	1	6	3	9	1	1	1	5	2	4	1	1	1	9	1	2	1	1	1	6	1	2	1	2	2	1	6	4	2	1	1	1	5	1	1	2	2	5	5	2				DMSO sgRNA vs. THAL SNS032 empty	2.993	2,641 to 3,346	Yes	****
1	2	4	10	10	6	1	2	1	3	1	1	1	1	1	3	1	11	3	1	1	8	1	8	1	2	2	4	5	2	1	2	1	1	4	1	1	1	1	1	1	1				DMSO sgRNA vs. THAL SNS032 sgRNA	1.345	1,056 to 1,635	Yes	****
1	1	1	1	6	5	1	3	3	1	3	3	5	3	1	2	5	1	1	1	1	6	3	1	1	1	1	1	3	2	2	2	1	1	1	3	1	1	1	1	1	1				DMSO sgRNA vs. NPV2 empty	3.107	2,654 to 3,560	Yes	****
1	1	1	3	1	1	1	2	6	1	3	1	1	1	1	3	3	4	1	1	1	1	4	4	1	4	4	2	7	2	1	1	1	1	6	1	1	1	1	1	1	1				DMSO sgRNA vs. NPV2 sgRNA	1.901	1,534 to 2,268	Yes	****
2	2	1	3	9	10	1	2	2	1	4	1	1	1	1	8	1	3	1	2	1	2	3	2	1	3	3	6	6	2	1	1	1	1	6	1	1	1	1	1	1	1				DMSO sgRNA vs. DRB empty	3.207	2,644 to 3,771	Yes	****
1	1	1	7	1	3	1	3	1	4	1	1	1	2	1	5	3	2	1	2	2	4	1	1	1	1	1	1	1	6	1	1	1	2	3	1	1	1	1	4	4	1				DMSO sgRNA vs. DRB sgRNA	2.223	1,756 to 2,690	Yes	****
1	2	1	7	5	4	1	1	1	10	1	5	1	1	1	9	2	1	1	1	1	5	4	2	1	1	1	1	1	1	1	1	1	1	1	5	2	1	3	1	1	2				THZ1 0,1uM empty vs. THZ1 0,1uM sgRNA	-2.701	-3,037 to -2,366	Yes	****
2	1	1	4	2	6	1	1	2	3	1	2	1	1	1	1	1	1	1	5	1	3	11	2	1	1	1	1	1	2	1	1	1	1	1	4	1	1	1	4	4	1				THZ1 0,1uM empty vs. THZ1 1uM empty	-0.04278	-0,4690 to 0,3835	No	ns
1	1	1	4	1	6	1	2	1	1	8	4	1	1	4	2	1	2	1	1	1	1	1	4	1	1	1	1	4	4	1	1	1	1	4	1	1	1	2	4	4	4				THZ1 0,1uM empty vs. THZ1 1uM sgRNA	-2.008	-2,363 to -1,653	Yes	****
1	3	2	3	1	2	1	1	1	6	18	4	1	1	1	1	1	4	1	1	1	1	1	1	2	1	1	1	4	2	2	1	1	1	12	3	1	1	1	3	3	1				THZ1 0,1uM empty vs. TZH531 empty	0.1377	-0,3486 to 0,6241	No	ns
1	2	1	3	1	6	1	2	2	7	7	10	1	2	1	1	8	1	2	1	2	1	5	4	1	1	1	1	3	2	1	1	1	2	4	1	2	1	3	1	1	2				THZ1 0,1uM empty vs. THZ531 sgRNA	-1.997	-2,362 to -1,633	Yes	****
1	1	2	1	8	1	1	1	1	8	2	2	1	2	1	2	6	3	1	1	3	1	1	6	1	1	1	1	5	5	1	3	1	1	3	1	2	1	1	2	2	6				THZ1 0,1uM empty vs. THAL SNS032 empty	-0.08963	-0,5126 to 0,3334	No	ns
1	1	2	1	1	2	2	1	2	14	8	5	2	2	1	8	1	2	1	2	1	7	1	4	1	1	1	4	11	1	2	1	1	1	1	1	1	1	1	8	8	2				THZ1 0,1uM empty vs. THAL SNS032 sgRNA	-1.738	-2,110 to -1,365	Yes	****
1	1	1	1	1	7	1	1	1	5	4	10	1	1	1	2	1	4	1	1	1	1	1	2	1	1	1	3	2	8	1	1	1	3	1	1	2	1	1	8	8	1				THZ1 0,1uM empty vs. NPV2 empty	0.02392	-0,4859 to 0,5337	No	ns
1	1	1	7	1	6	2	1	1	1	9	1	1	2	1	6	1	1	1	1	1	4	4	3	1	1	1	1	1	6	1	1	1	1	1	1	3	2	1	1	1	1				THZ1 0,1uM empty vs. NPV2 sgRNA	-1.182	-1,618 to -0,7464	Yes	****
1	2	1	2	1	1	1	1	1	6	14	1	1	1	1	4	4	2	2	1	1	2	5	4	2	1	1	2	2	4	1	3	1	7	1	4	1	1	1	1	1	5				THZ1 0,1uM empty vs. DRB empty	0.1242	-0,4861 to 0,7344	No	ns
1	2	3	4	8	12	1	1	2	14	3	9	1	2	1	8	4	5	1	1	2	4	4	5	2	2	2	1	3	6	5	3	1	1	1	1	1	1	1	1	1	1				THZ1 0,1uM empty vs. DRB sgRNA	-0.8601	-1,383 to -0,3375	Yes	****
1	2	2	1	1	1	1	1	1	1	16	5	1	1	1	1	3	8	1	1	1	1	2	3	1	3	3	3	1	5	2	1	1	1	2	1	1	1	1	2	2	2				THZ1 0,1uM sgRNA vs. THZ1 1uM empty	2.659	2,293 to 3,024	Yes	****
1	1	3	1	8	5	3	1	1	1	1	7	1	1	1	6	6	1	1	1	1	4	1	5	1	1	1	1	1	4	2	2	1	1	4	2	1	1	1	1	1	1				THZ1 0,1uM sgRNA vs. THZ1 1uM sgRNA	0.6935	0,4140 to 0,9729	Yes	****
1	1	2	1	9	2	1	2	5	2	1	10	1	1	2	1	4	4		1	1	1	1	2	1	1	1	1	9	9	3	1	1	1	1	7	1	1	1	5	5	4				THZ1 0,1uM sgRNA vs. TZH531 empty	2.839	2,405 to 3,274	Yes	****
1	1	4	1	3	2	3	1	1	3	1	1	2	3	1	1	2	1		1	3	4	2	3	2	1	1	2	1	9	1	1	1	6	3	2	1	1	1	1	1	2				THZ1 0,1uM sgRNA vs. THZ531 sgRNA	0.7042	0,4125 to 0,9958	Yes	****
1	2	1	1	1	7	1	2	1	1	10	7	2	1	1	5	8	1		1	4	11	7	5	1	1	1	6	2	5	1	2	3	1	2	1	1	1	1	5	5	4				THZ1 0,1uM sgRNA vs. THAL SNS032 empty	2.612	2,250 to 2,974	Yes	****
1	1	1	10	13	1	1	1	1	1	10	11	1	3	2	7	2	3		2	1	1	10	2	1	1	1	8	3	1	1	2	1	1	5	1	1	1	1	1	1	1				THZ1 0,1uM sgRNA vs. THAL SNS032 sgRNA	0.9636	0,6620 to 1,265	Yes	****
1	1	2	3	2	9	3	1	2	1	1	1	1	1	1	5	2	2		2	1	4	4	2	1	1	1	1	2	1	2	1	2	1	4	5	1	2	1	1	1	4				THZ1 0,1uM sgRNA vs. NPV2 empty	2.725	2,265 to 3,186	Yes	****
2	1	2	4	7	3	2	3	1	1	2	1	1	1	1	1	6	2		1	1	5	7	1	1	1	1	7	1	3	1	1	1	1	1	5	1		1	1	1	2				THZ1 0,1uM sgRNA vs. NPV2 sgRNA	1.519	1,142 to 1,896	Yes	****
1	1	1	8	7	1	1	1	2	3	1	1	1	1	1	3	7	2		1	1	1	5	1	1	1	1	4	1	4	1	2	1	1	2	4	4			5	5	1				THZ1 0,1uM sgRNA vs. DRB empty	2.825	2,256 to 3,395	Yes	****
1	1	1	4	8	12	1	2	1	11	1	6	2	1	1	5	5	5		1	1	6	1	12	2	1	1	2	7	5	2	1	1	5	1	1	1			1	1	2				THZ1 0,1uM sgRNA vs. DRB sgRNA	1.841	1,367 to 2,316	Yes	****
2	1	1	9	6	4	1	1	1	11	1	4	1	2	2	3	1	1		1	1	7	2	1	1	1	1	1	6	4	4	1	1	2	1	1	1			1	1	1				THZ1 1uM empty vs. THZ1 1uM sgRNA	-1.965	-2,349 to -1,581	Yes	****
2	1	1	5	9	10	1	1	1	1	8	4	1	2	1	1	5	9		1	1	1	1	6	2	1	1	4	3	2	1	1	1	5	3	2	2			1	1	1				THZ1 1uM empty vs. TZH531 empty	0.1805	-0,3273 to 0,6884	No	ns
2	1	2	6	5	1	1	2	1	1	4	1	1	2	1	1	3	1		1	1	3	5	7	2	2	2	1	1	1	1	1	1	4	1	1	3			1	1	2				THZ1 1uM empty vs. THZ531 sgRNA	-1.954	-2,347 to -1,562	Yes	****
1	1	1	5	1	2	1	2	1	1	4	1	1	1	1	1	7	6		1	1	8	2	1	1	2	2	1	1	2	1	1	3	1	3	1	1			4	4	1				THZ1 1uM empty vs. THAL SNS032 empty	-0.04684	-0,4944 to 0,4007	No	ns
1	2	1	6	9	1	1	1	1	5	1	1	1	2	1	2	5	1		1	1	1	2	2	1	1	1	4	6	4	3	2	3	1	1	1	1			1	1	1				THZ1 1uM empty vs. THAL SNS032 sgRNA	-1.695	-2,095 to -1,295	Yes	****
1	1	5	11	6	5	1	2	1	2	7	10	1	1	1	6	4	3		1	1	1	1	5	1	2	2	1	6	3	1	1	1	1	1	1	1			1	1	3				THZ1 1uM empty vs. NPV2 empty	0.06671	-0,4636 to 0,5970	No	ns
2	1	1	1	5	5	3	1	1	1	1	2	1	3	1	7	1	2		1	1	1	1	4	1	2	2	1	2	1	2	2	1	2	1	1	1			1	1	2				THZ1 1uM empty vs. NPV2 sgRNA	-1.139	-1,599 to -0,6798	Yes	****
1	1	1	8	4	1	1	5	1	7	2	3	2	1	1	1	4	2		2	2	3	7	4	1	3	3	1	2	1	1	1	1	1	1	3	1			1	1	1				THZ1 1uM empty vs. DRB empty	0.1669	-0,4606 to 0,7945	No	ns
1	2	6	3	11	1	1	1	1	2	5	2	2	1	1	1	1	1		1	1	6	2	4	1	1	1	2	10	2	1	1	1	1	3	7	1			4	4	5				THZ1 1uM empty vs. DRB sgRNA	-0.8173	-1,360 to -0,2747	Yes	****
1	1	1	1	2	5	1	2	1	11	8	3	1	1	1	2	1	3		1	1	1	2	5	1	1	1	6	4	1	2	1	1	6	1	5	1			4	4	2				THZ1 1uM sgRNA vs. TZH531 empty	2.146	1,696 to 2,595	Yes	****
3	1	6	2	2	7	1	1	1	10	1	2	1	1	1	11	1	6		1	1	2	1	2	3	2	2	10	6	6	1	1	1	3	3	7	1			3	3	8				THZ1 1uM sgRNA vs. THZ531 sgRNA	0.01072	-0,3030 to 0,3244	No	ns
1	1	1	8	1	3	1	1	1	9	3	1	1	1	1	3	4	6		1	1	7	5	4	1	2	2	6	1	2	1	1	1	2	1	1	1			2	2	1				THZ1 1uM sgRNA vs. THAL SNS032 empty	1.918	1,538 to 2,298	Yes	****
1	4	1	7	8	2	1	1	1	1	4	1	1	2	2	5	7	3		1	1	3	1	6	2	4	4	1	2	4	1	1	1	2	1	1	1			1	1	2				THZ1 1uM sgRNA vs. THAL SNS032 sgRNA	0.2702	-0,05278 to 0,5931	No	ns
1	1	1	8	1	5	1	1	1	1	1	9	3	1	1	13	1	1		1	1	5	2	1	2	1	1	1	5	4	1	1	1	8	1	4	1			1	1	6				THZ1 1uM sgRNA vs. NPV2 empty	2.032	1,557 to 2,507	Yes	****
1	2	2	9	5	1	1	1	1	13	6	1	2	6	2	1	5	4		1	1	7	1	5	1	3	3	1	2	2	1	1	1	1	1	2				1	1	1				THZ1 1uM sgRNA vs. NPV2 sgRNA	0.8258	0,4317 to 1,220	Yes	****
2	2	1	8	4	6	1	1	2	2	1	5	1	1	1	6	1	1		1	1	1	12	4	1	4	4	1	5	4	1	1	1	1	1	8				3	3	1				THZ1 1uM sgRNA vs. DRB empty	2.132	1,551 to 2,713	Yes	****
1	1	1	4	6	9	2	1	1	2	7	4	1	2	1	6	4	5		1	1	4	1	2	2	4	4	1	7	9	1	1	1	4	1	1				1	1	1				THZ1 1uM sgRNA vs. DRB sgRNA	1.148	0,6593 to 1,636	Yes	****
1	1	2	3	9	4	4	1	1	2	9	3	1	1	2	2	1	11		1	1	2	4	5	1	3	3	1	6	6	2	1	1	4	1	4				1	1	1				TZH531 empty vs. THZ531 sgRNA	-2.135	-2,592 to -1,678	Yes	****
1	1	1	4	6	3	1	1	1	1	9	8	1	2	1	8	8	1		1	1	5	3	5	2	2	2	1	1	2	1	1	1	7	2	9				1	1	1				TZH531 empty vs. THAL SNS032 empty	-0.2274	-0,7325 to 0,2778	No	ns
1	1	1	7	3	3	1	1	1	1	9	6	1	1	1	2	1	1		1	2	5	1	2	2	1	1	1	1	5	1	1	1	4	2	2				1	1	5				TZH531 empty vs. THAL SNS032 sgRNA	-1.875	-2,339 to -1,412	Yes	****
1	1	1	2	6	9	1	2	1	2	4	2	1	1	2	2	7	1		1	1	3	4	1	1	2	2	1	4	3	2	1	2	3	1	1				2	2	2				TZH531 empty vs. NPV2 empty	-0.1138	-0,6936 to 0,4659	No	ns
1	1	2	6	4	8	2	2	3	2	7	7	2	1	1	7	8	4		2	1	2	6	6	1	1	1	6	5	2	1	1	1	2	1	5				2	2	1				TZH531 empty vs. NPV2 sgRNA	-1.32	-1,836 to -0,8040	Yes	****
5	1	3	1	3	2	1	2	1	4	2	1	1	1	1	3	9	1		1	1	2	3	3	1	1	1	1	7	2	1	1	1	2	4	2				1	1	1				TZH531 empty vs. DRB empty	-0.0136	-0,6834 to 0,6562	No	ns
1	1	1	1	7	6	2	1	1	1	2	7	1	1	3	2	2	3		1	1	6	4	1	1	1	1	5	4	1	1	3	1	5	6	3				2	2	1				TZH531 empty vs. DRB sgRNA	-0.9978	-1,589 to -0,4068	Yes	****
1	1	2	4	4	5	1	1	1	3	2	1	1	1	1	2	3	1		1	1	3	2	7	1	1	1	7	5	8		2	1	1	2	1				3	3	1				THZ531 sgRNA vs. THAL SNS032 empty	1.907	1,518 to 2,297	Yes	****
1	3	1	8	4	4	1	1	2	2	2	7	1	1	3	2	6	1		1	1	1	1	4	1	1	1	3	7	7		1	1	1	2	2				8	8	1				THZ531 sgRNA vs. THAL SNS032 sgRNA	0.2594	-0,07415 to 0,5930	No	ns
1	1	1	3	4	3	1	1	1	1	1	1	1	1	1	5	4	4		1	1	3	10	4	2	1	1	1	2	3		1	1	1	1	2				4	4	1				THZ531 sgRNA vs. NPV2 empty	2.021	1,539 to 2,503	Yes	****
6	1	1	10	2	2	1	1	1	6	1	3	1	1	1	1	4	1		1	1	4	1	8	1	2	2	5	3	1		1	1	1	4	5				1	1	1				THZ531 sgRNA vs. NPV2 sgRNA	0.8151	0,4122 to 1,218	Yes	****
1	2	1	1	6	9	1	1	1	1	1	4	1	1	1	4	4	5		2	2	2	7	2	1	1	1	1	3	8		1	1	2	1	10				4	4	2				THZ531 sgRNA vs. DRB empty	2.121	1,534 to 2,709	Yes	****
1	1	1	5	1	4	1	2	1	1	3	6	1	1	1	6	3	4		1	1	2	4	7	1	1	1	2	8	1		1	2	2	1	5				1	1	1				THZ531 sgRNA vs. DRB sgRNA	1.137	0,6414 to 1,633	Yes	****
2	2	1	3	10	4	1	1	1	9	5	3	1	4	4	1	1	7		1	1	6	1	1	1	1	1	1	3	3		1	4	2	1	4				2	2	1				THAL SNS032 empty vs. THAL SNS032 sgRNA	-1.648	-2,045 to -1,251	Yes	****
3	1	2	3	1	2	1	2	1	2	9	1	3	2	1	6	3	5		1	1	4	2	4	1	8	8	1	2	1		2	1	1	2	3				2	2	1				THAL SNS032 empty vs. NPV2 empty	0.1136	-0,4142 to 0,6413	No	ns
1	1	1	10	4	5	1	1	1	8	5	4	1	1	1	5	1	2		2	1	6	4	3	1	7	7	1	1	6		1	1	2	2	1				1	1	1				THAL SNS032 empty vs. NPV2 sgRNA	-1.092	-1,549 to -0,6359	Yes	****
1	2	1	3	7	5	1	1	1	8	1	2	1	2	1	6	1	1		2	1	8	2	10	2	2	2	1	3	7		1	2	7	7	1				5	5	1				THAL SNS032 empty vs. DRB empty	0.2138	-0,4116 to 0,8391	No	ns
1	1	1	13	9	7	1	2	1	6	2	9	1	1	1	4	7	2		1	1	5	1	6	1	4	4	3	2	1		1	1	2	2	3				1	1	1				THAL SNS032 empty vs. DRB sgRNA	-0.7705	-1,311 to -0,2304	Yes	***
2	1	3	5	6	3	1	3	1	1	2	2	1	1	3	2	1	6		1	1	4	3	11	3	1	1	5	5	1		1	1	1	3	2				1	1	1				THAL SNS032 sgRNA vs. NPV2 empty	1.762	1,273 to 2,250	Yes	****
1	1	1	3	2	5	1	1	1	1	5	1	1	1	2	5	3	1		1	1	1	3	2	1	1	1	1	4	5		1	1	2	4	2				2	2	1				THAL SNS032 sgRNA vs. NPV2 sgRNA	0.5556	0,1455 to 0,9657	Yes	***
1	1	2	9	2	3	1	1	1	6	1	3	1	1	1	4	3	5		1	3	2	3	9	1	1	1	1	1	7		2	1	1	2	8				4	4	1				THAL SNS032 sgRNA vs. DRB empty	1.862	1,270 to 2,454	Yes	****
1	2	2	3	4	5	1	2	1	1	1	1	1	1	2	1	1	1		3	1	3	7	5	1	1	1	10	1	3		1	1	3	3	2				1	1	8				THAL SNS032 sgRNA vs. DRB sgRNA	0.8776	0,3761 to 1,379	Yes	****
1	1	1	5	3	4	1	1	1	5	8	1	1	1	1	1	2	5		1	1	5	3	5	1	1	1	5	4	5		2	1	1	1	2				1	1	1				NPV2 empty vs. NPV2 sgRNA	-1.206	-1,744 to -0,6681	Yes	****
1	1	1	5	6	8	1	2	1	7	1	2	1	1	1	7	5	1		1	1	5	2	7	3	1	1	1	1	1		2	1	1	1	1				3	3	1				NPV2 empty vs. DRB empty	0.1002	-0,5868 to 0,7872	No	ns
1	1	1	6	1	6	1	1	2	7	1	6	1	1	1	5	4	1		2	1	11	2	1	1	1	1	9	4	5		1	1	1	4	8				4	4	1				NPV2 empty vs. DRB sgRNA	-0.884	-1,494 to -0,2736	Yes	***
1	1	1	11	9	1	1	1	1	6	4	1	1	3	1	1	5	4		1	2	2	7	2	3	1	1	1	4	3		2	1	6	1	1				1	1	7				NPV2 sgRNA vs. DRB empty	1.306	0,6722 to 1,940	Yes	****
1	1	1	1	7	3	1	2	1	2	3	6	1	1	2	1	7	11		1	1	1	11	1	1	1	1	6	1	2		1	1	2	1	1				2	2	9				NPV2 sgRNA vs. DRB sgRNA	0.3219	-0,2281 to 0,8720	No	ns
2	4	2	3	7	9	3	1	1	3	5	5	1	1	6	3	1	1		1	1	5	10	2	1	1	1	2	1	6			1	1	1	3				1	1	7				DRB empty vs. DRB sgRNA	-0.9842	-1,681 to -0,2877	Yes	***
1	1	1	1	20	1	1	2	2	4	6	5	1	1	5	6	1	6		1	2	7	2	2	1	1	1	1	2	12			2	1	6	4				1	1	1
2	1	1	4	2	6	1	1	4	1	2	8	1	1	1	5	2	9		2	1	2	2	4	1	1	1	1	2	7			1	2	5	5				4	4					Test details	Mean 1	Mean 2	Mean Diff,	SE of diff,
2	2	1	5	5	6	1	2	3	6	1	10	2	1	1	1	9	3		1	1	5	1	1	1	2	2	14	1	5			1	1	1	3				1	1					DMSO empty vs. DMSO sgRNA	1.42	4.45	-3.029	0.09176
1	1	1	1	6	6	1	1	3	6	7	2	1	1	1	2	1	4		1	2	3	3	5	1	1	1	4	1	2			2	1	1	2				1	1					DMSO empty vs. THZ1 0,1uM empty	1.42	1.367	0.05349	0.1153
1	1	1	1	8	2	1	1	1	3	1	1	1	3	2	2	2	6		1	1	3	3	7	1	2	2	1	3	1			1	1	4	10				1	1					DMSO empty vs. THZ1 0,1uM sgRNA	1.42	4.068	-2.648	0.09508
2	1	1	8	4	4	1	1	2	7	4	10	1	4	1	2	2	4		1	1	1	3	4	2	1	1	5	3	1			1	2	1	4				2	2					DMSO empty vs. THZ1 1uM empty	1.42	1.409	0.01071	0.1232
1	3	1	15	5	1	1	1	2	2	1	6	1	2	1	2	1	1		1	1	1	1	1	1	3	3	2	2	2			1	12	3	1				1	1					DMSO empty vs. THZ1 1uM sgRNA	1.42	3.374	-1.954	0.1011
1	1	10	7	2	8	1	1	1	3	3	12	1	1	1	4	1	1		1	1	3	6	1	1	2	2	1	1	2			1	3	5	1				1	1					DMSO empty vs. TZH531 empty	1.42	1.229	0.1912	0.1416
1	1	1	5	3	9	1	1	1	6	9	4	1	1	1	3	1	1		1	1	1	1	3	1	1	1	2	7	2			1	5	1	9				1	1					DMSO empty vs. THZ531 sgRNA	1.42	3.364	-1.944	0.1041
2	1	1	3	1	1	1	2	1	3	10	7	2	1	1	1	2	3		3	2	2	3	2	1	1	1	1	3	5			1	1	2	7				1	1					DMSO empty vs. THAL SNS032 empty	1.42	1.456	-0.03614	0.1222
2	1	1	3	3	6	1	1	2	2	12	1	1	1	1	4	2	4		1	2	3	3	1	1	1	1	3	2	5			1	1	1	1				1	1					DMSO empty vs. THAL SNS032 sgRNA	1.42	3.104	-1.684	0.1066
2	1	1	7	7	11	2	1	1	4	2	2	1	1	1	1	2	1		1	2	9	4	1	1	1	1	8	5	7			1	1	1	3				8	8					DMSO empty vs. NPV2 empty	1.42	1.343	0.07741	0.1488
1	1	1	2	2	1	1	1	1	13	7	4	1	1	3	4	3	1		1	2	1	2	5	1	1	1	1	1	6			1	3	1	2				1	1					DMSO empty vs. NPV2 sgRNA	1.42	2.549	-1.129	0.1261
4	1	1	3	3	6	1	2	2	1	4	7	1	1	1	1	1	2		1	2	3	1	3	1	1	1	1	1	5			1	1	1	7				2	2					DMSO empty vs. DRB empty	1.42	1.242	0.1776	0.1792
1	3	1	3	7	6	1	1	1	3	1	3	1	1	1	7	2	9		1	1	1	1	5	1	3	3	1	5	1			1	4	1	2				6	6					DMSO empty vs. DRB sgRNA	1.42	2.227	-0.8066	0.1526
1	2	1	3	4	1	2	3	1	6	1	1	1	1	2	7	5	6		1	1	1	4	1	1	1	1	8	4	3			1	1	7	8				1	1					DMSO sgRNA vs. THZ1 0,1uM empty	4.45	1.367	3.083	0.09683
1	1	1	1	2	7	2	1	1	3	11	5	1	1	1	5	1	1		1	1	2	5	9	1	1	1	7	3	4			1	1	1	4				5	5					DMSO sgRNA vs. THZ1 0,1uM sgRNA	4.45	4.068	0.3817	0.07163
2	1	1	6	3	1	1	1	1	5	4	6	1	1	1	3	2	6		1	1	3	7	6	2	1	1	1	4	6			1	1	1	7				3	3					DMSO sgRNA vs. THZ1 1uM empty	4.45	1.409	3.04	0.1062
2	1	1	6	4	1	1	6	1	8	2	1	1	1	3	4	1	3		1	1	3	1	2	2	1	1	3	1	5			2	1	1	4				1	1					DMSO sgRNA vs. THZ1 1uM sgRNA	4.45	3.374	1.075	0.07947
2	1	1	9	2	2	4	2	1	4	1	7	1	1	1	5	1	2		1	1	3	4	4	2	1	1	1	2	6			1	1	1	2				4	4					DMSO sgRNA vs. TZH531 empty	4.45	1.229	3.221	0.1271
2	1	2	12	4	9	1	2	24	1	2	7	1	1	1	2	3	2		2	1	2	6	5	1	1	1	1	1	6			1	2	1	1										DMSO sgRNA vs. THZ531 sgRNA	4.45	3.364	1.086	0.08329
1	1	2	1	4	7	1	2	1	8	8	1	1	1	1	3	4	2		1	1	3	5	3	2	1	1	1	2	4			2	1	1	3										DMSO sgRNA vs. THAL SNS032 empty	4.45	1.456	2.993	0.105
3	1	1	5	4	4	1	1	1	2	1	6	2	2	1	3	2	1		1	1	2	1	1	1	1	1	1	1	2			1	4	1	5										DMSO sgRNA vs. THAL SNS032 sgRNA	4.45	3.104	1.345	0.08636
1	2	2	5	3	4	1	1	4	3	5	1	1	1	1	3	2	4		1	2	1	2	1	2	2	2	1	1	2			1	1	1	5										DMSO sgRNA vs. NPV2 empty	4.45	1.343	3.107	0.135
1	2	1	1	5	5	1	1	1	8	1	1	1	4	1	2	4	2		1	2	3	2	1	3	1	1	1	1	2			1	6	2	1										DMSO sgRNA vs. NPV2 sgRNA	4.45	2.549	1.901	0.1095
3	1	1	1	3	5	1	1	1	1	7	6	1	2	2	1	1	4		1	1	4	1	4	1	1	1	9	1	1			1	1	2	4										DMSO sgRNA vs. DRB empty	4.45	1.242	3.207	0.168
1	1	1	5	4	9	1	1	1	1	1	6	1	1	1	4	3	1		1	1	4	1	4	1	1	1	1	1	2			1	3	1	1										DMSO sgRNA vs. DRB sgRNA	4.45	2.227	2.223	0.1393
1	1	1	13	8	10	1	1	1	8	9	5	1	1	1	6	1	1			1	2	2	2	1	1	1	1	4	2			1	1	3	5										THZ1 0,1uM empty vs. THZ1 0,1uM sgRNA	1.367	4.068	-2.701	0.09998
1	1	1	7	6	7	1	1	1	1	1	2	2	2	1	1	3	2			1	1	1	2	1	1	1	1	5	2			1	1	1	1										THZ1 0,1uM empty vs. THZ1 1uM empty	1.367	1.409	-0.04278	0.127
1	1	2	8	4	7	1	1	2	6	1	2	1	1	1	1	4	2			2	3	6	1	1	1	1	1	5	4			2	2	1	1										THZ1 0,1uM empty vs. THZ1 1uM sgRNA	1.367	3.374	-2.008	0.1057
3	1	1	8	11	8	2	1	1	6	2	5	8	1	1	2	1	5			1	3	2	1	1	1	1	2	6	3			2	1	1	5										THZ1 0,1uM empty vs. TZH531 empty	1.367	1.229	0.1377	0.145
1	1	1	7	9	6	1	1	1	10	3	1	1	2	1	2	2	2			1	5	4	1	2	1	1	1	4	1				1	1	4										THZ1 0,1uM empty vs. THZ531 sgRNA	1.367	3.364	-1.997	0.1086
1	1	1	1	1	7	3	1	1	1	1	9	1	1	1	7	5	1			1	3	8	2	1	4	4	3	7	1				1	1	1										THZ1 0,1uM empty vs. THAL SNS032 empty	1.367	1.456	-0.08963	0.1261
2	4	1	9	6	9	1	1	1	9	1	5	1	1	1	1	1	1			1	1	3	4	2	4	4	2	1	2				1	1	1										THZ1 0,1uM empty vs. THAL SNS032 sgRNA	1.367	3.104	-1.738	0.111
1	2	1	4	3	4	1	1	1	5	2	7	1	1	1	2	1	8			1	1	7	1	1	2	2	1	1	1				7	2	2										THZ1 0,1uM empty vs. NPV2 empty	1.367	1.343	0.02392	0.1519
1	1	2	4	5	10	1	1	1	4	5	5	1	1	2	8	1	5			1	1	2	1	3	1	1	1	7	3				1	3	1										THZ1 0,1uM empty vs. NPV2 sgRNA	1.367	2.549	-1.182	0.1298
1	1	2	6	3	2	1	1	2	5	1	4	1	1	3	1	1	1			1	7	1	7	1	1	1	1	2	1				7	2	2										THZ1 0,1uM empty vs. DRB empty	1.367	1.242	0.1242	0.1819
2	3	1	11	8	1	1	1	2	3	3	5	2	2	1	4	1	1			1	1	2	9	1	1	1	5	1	1				1	1	1										THZ1 0,1uM empty vs. DRB sgRNA	1.367	2.227	-0.8601	0.1558
1	1	1	5	3	5	4	1	1	1	2	10	3	1	1	3	1	2			1	1	2	2	4	1	1	1	2	1				3	1	8										THZ1 0,1uM sgRNA vs. THZ1 1uM empty	4.068	1.409	2.659	0.1091
7	1	1	2	7	1	1	1	1	6	1	10	1	1	1	4	4	3			1	10	3	6	3	1	1	5	4	1				2	2	1										THZ1 0,1uM sgRNA vs. THZ1 1uM sgRNA	4.068	3.374	0.6935	0.08329
1	1	3	7	1	12	1	2	1	1	1	7	1	4	2	2	1	7			3	3	3	3	1	1	1	7	2	1				1	4	2										THZ1 0,1uM sgRNA vs. TZH531 empty	4.068	1.229	2.839	0.1295
1	2	1	4	8	2	1	1	1	1	1	1	2	1	1	1	5	5			1	5	2	1	2	4	4	1	1	1				1	1	1										THZ1 0,1uM sgRNA vs. THZ531 sgRNA	4.068	3.364	0.7042	0.08694
1	1	1	4	1	1	1	1	1	7	8	6	1	1	1	2	1	1			1	3	2	8	1	1	1	1	1	1				2	6	1										THZ1 0,1uM sgRNA vs. THAL SNS032 empty	4.068	1.456	2.612	0.1079
1	1	1	2	7	8	1	1	1	2	7	1	1	7	1	2	4	5			2	1	5	4	1	2	2	8	1	5				3	1	1										THZ1 0,1uM sgRNA vs. THAL SNS032 sgRNA	4.068	3.104	0.9636	0.08988
1	1	1	9	4	6	1	1	1	7	2	4	1	1	1	1	9	3			2	4	1	2	1	1	1	4	1	9				1	2	1										THZ1 0,1uM sgRNA vs. NPV2 empty	4.068	1.343	2.725	0.1373
2	1	5	5	4	5	1	1	1	7	1	1	1	3	1	7	4	1			1	4	5	4	1	2	2	1	1	2				1	1	2										THZ1 0,1uM sgRNA vs. NPV2 sgRNA	4.068	2.549	1.519	0.1123
1	1	1	8	1	1	2	1	1	1	3	1	2	2	1	2	2	1			1	6	2	1	2	1	1	3	1	4				13	6	2										THZ1 0,1uM sgRNA vs. DRB empty	4.068	1.242	2.825	0.1698
3	1	1	1	3	1	2	1	3	4	1	2	2	2	2	4	1	1			1	1	1	7	1	1	1	1	1	7				4	2	2										THZ1 0,1uM sgRNA vs. DRB sgRNA	4.068	2.227	1.841	0.1415
1	2	3	8	5	8	1	1	1	5	4	1	1	2	1	1	1	1			1	1	5	2	1	1	1	1	1	7				1	1	6										THZ1 1uM empty vs. THZ1 1uM sgRNA	1.409	3.374	-1.965	0.1144
1	1	1	8	10	5	1	2	1	4	5	1	1	1	1	2	3	3			1	1	1	2	1	1	1	6	1	2				3	1	1										THZ1 1uM empty vs. TZH531 empty	1.409	1.229	0.1805	0.1514
1	1	1	6	2	8	1	1	2	5	1	3	1	1	1	2	2	4			1	12	1	3	1	2	2	6	2	1				1	1	10										THZ1 1uM empty vs. THZ531 sgRNA	1.409	3.364	-1.954	0.1171
1	1	1	6	10	1	1	1	1	2	6	4	1	2	1	2	5	1			1	1	4	5	1	1	1	4	1	1				4	2	2										THZ1 1uM empty vs. THAL SNS032 empty	1.409	1.456	-0.04684	0.1334
2	2	1	8	8	1	1	1	1	4	1	1	1	1	1	2	4	3			2	1	1	7	1	1	1	1	3	5				4	1	4										THZ1 1uM empty vs. THAL SNS032 sgRNA	1.409	3.104	-1.695	0.1193
2	1	1	1	1	10	1	1	3	9	1	4	1	3	4	6	3	7			1	1	1	3	1	1	1	1	1	1				1	1	1										THZ1 1uM empty vs. NPV2 empty	1.409	1.343	0.06671	0.1581
1	1	1	6	1	2	1	1	1	1	1	4	1	3	1	1	8	3			1	9	1	1	3	1	1	1	1	5				3	1	3										THZ1 1uM empty vs. NPV2 sgRNA	1.409	2.549	-1.139	0.137
1	1	1	7	6	2	1	1	1	3	3	4	1	1	1	1	8	3				13	1	5	1	1	1	1	1	1				1	1	1										THZ1 1uM empty vs. DRB empty	1.409	1.242	0.1669	0.187
2	3	2	9	1	4	2	1	1	3	3	6	1	1	1	6	1	1				1	9	4	1	1	1	1	2	14				7	4	1										THZ1 1uM empty vs. DRB sgRNA	1.409	2.227	-0.8173	0.1617
3	1	1	5	12	6	1	1	1	4	6	8	1	1	1	1	1	5				3	4	2	1	1	1	1	11	5				1	8	1										THZ1 1uM sgRNA vs. TZH531 empty	3.374	1.229	2.146	0.134
1	2	1	6	7	5	1	1	1	1	1	4	1	1	2	7	1	1				5	1	1	1	1	1	1	6	6				4	1	2										THZ1 1uM sgRNA vs. THZ531 sgRNA	3.374	3.364	0.01072	0.09351
1	2	1	4	5	4	2	1	1	4	1	4	9	1	1	2	2	2				4	1	4	2	1	1	3	1	1				3	1	1										THZ1 1uM sgRNA vs. THAL SNS032 empty	3.374	1.456	1.918	0.1133
1	1	1	7	2	3	1	2	1	4	1	14	3	1	1	1	1	1				4	3	9	1	1	1	3	4	4				1	1	3										THZ1 1uM sgRNA vs. THAL SNS032 sgRNA	3.374	3.104	0.2702	0.09625
1	1	1	4	4	5	2	1	3	10	1	7	1	1	2	6	1	2				5	4	3	1	1	1	4	1	6				1	2	1										THZ1 1uM sgRNA vs. NPV2 empty	3.374	1.343	2.032	0.1415
1	1	1	5	5	6	1	1	1	4	1	14	1	1	2	1	1	2				4	1	2	1	1	1	4	3	12				1	1	3										THZ1 1uM sgRNA vs. NPV2 sgRNA	3.374	2.549	0.8258	0.1175
1	2	1	7	4	10	1	1	2	3	8	8	1	3	1	1	1	1				1	1	1	1	1	1	2	7	3				2	4	1										THZ1 1uM sgRNA vs. DRB empty	3.374	1.242	2.132	0.1733
1	1	3	6	1	3	1	1	1	2	1	6	1	1	7	1	1	1				4	4	1	1	2	2	5	4	1				1	1	7										THZ1 1uM sgRNA vs. DRB sgRNA	3.374	2.227	1.148	0.1456
1	1	1	7	7	1	1	1	1	7	2	3	7	1	1	5	2	14				3	4	4	1	1	1	4	6	5				1	2	1										TZH531 empty vs. THZ531 sgRNA	1.229	3.364	-2.135	0.1363
1	2	1	11	5	5	2	1	1	1	10	3	1	1	1	1	4	5				1	5	3	1	1	1	1	11	6				2	1	1										TZH531 empty vs. THAL SNS032 empty	1.229	1.456	-0.2274	0.1506
1	2	1	8	10	7	1	2	1	7	1	7	1	1	1	1	1	1				1	1	4	2	3	3	4	1	1				2	3	5										TZH531 empty vs. THAL SNS032 sgRNA	1.229	3.104	-1.875	0.1382
1	7	1	1	5	8	4	1	1	2	6	9	2	1	1	6	6	5				4	5	1	1	1	1	4	2	4				1	1	2										TZH531 empty vs. NPV2 empty	1.229	1.343	-0.1138	0.1728
2	1	1	6	2	8	1	2	1	9	7	5	2	7	1	2	5	2				7	2	2	1	1	1	3	5	1				1	2	1										TZH531 empty vs. NPV2 sgRNA	1.229	2.549	-1.32	0.1537
1	1	1	9	7	3	2	1	1	5	1	7	6	1	1	1	1	1				2	6	1	2	3	3	8	2	1				3	2	2										TZH531 empty vs. DRB empty	1.229	1.242	-0.0136	0.1997
1	1	1	6	4	4	1	1	1	1	3	1	1	1	2	1	2	2				6	1	2	1	1	1	2	2	1				1		8										TZH531 empty vs. DRB sgRNA	1.229	2.227	-0.9978	0.1762
1	2	1	4	5	6	2	1	1	1	2	3	1	1	3	1	8	2				4	3	1	1	1	1	1	1	7				1		3										THZ531 sgRNA vs. THAL SNS032 empty	3.364	1.456	1.907	0.116
2	1	4	9	5	7	1	1	1	2	1	4	1	1	1	1	8	4				3	2	3	1	1	1	1	5	1				1		1										THZ531 sgRNA vs. THAL SNS032 sgRNA	3.364	3.104	0.2594	0.09943
6	1	1	8	11	6	1	2	1	5	1	5		2	1	2	1	1				1	3	2	1	1	1	1	9	7				1		2										THZ531 sgRNA vs. NPV2 empty	3.364	1.343	2.021	0.1437
1	1	1	4	4	1	1	1	1	1	6	3		1	4	2	3	1				1	6	1	1	2	2	1	3	4				1		6										THZ531 sgRNA vs. NPV2 sgRNA	3.364	2.549	0.8151	0.1201
1	1	1	11	5	6	1	1	4	13	1	2		4	2	5	10	1				6	2	1	1	3	3	2	1	1				6		4										THZ531 sgRNA vs. DRB empty	3.364	1.242	2.121	0.1751
1	1	3	11	6	7	1	1	1	4	1	7		6	2	5	3	4				3	10	1	1	1	1	1	2	3				1		7										THZ531 sgRNA vs. DRB sgRNA	3.364	2.227	1.137	0.1477
1	2	4	5	1	8	1	1	1	2	1	5		1	1	1	10	1				1	3	5	1	2	2	2	3	1				4		1										THAL SNS032 empty vs. THAL SNS032 sgRNA	1.456	3.104	-1.648	0.1182
2	1	1	9	9	3	2	1	1	1	1	7		1	1	1	2	1				8	5	5	1	3	3	5	2	10				1		4										THAL SNS032 empty vs. NPV2 empty	1.456	1.343	0.1136	0.1573
1	1	1	7	3	7	1	2	1	7	4	4		1	1	3	2	4				1	4	3	1	1	1	2	2	9				2		1										THAL SNS032 empty vs. NPV2 sgRNA	1.456	2.549	-1.092	0.1361
2	2	1	6	6	3	1	1	2	13	2	7		1	1	1	1	5				7	11	3	1	6	6	1	2	1				1		1										THAL SNS032 empty vs. DRB empty	1.456	1.242	0.2138	0.1864
1	1	1	5	4	1	1	1	1	5	1	5		1	1	5	7	9				5	1	1	1	1	1	8	2	1				1		1										THAL SNS032 empty vs. DRB sgRNA	1.456	2.227	-0.7705	0.161
2	1	1	4	6	5	1	1	1	8	2	3		1	2	2	2	1				1	1	1	1	1	1	3	1	7				1		3										THAL SNS032 sgRNA vs. NPV2 empty	3.104	1.343	1.762	0.1455
1	1	3	11	8	1	2	1	1	8	2	3		1	1	1	2	5				3	3	3	1	1	1	2	1	3				1		3										THAL SNS032 sgRNA vs. NPV2 sgRNA	3.104	2.549	0.5556	0.1222
2	2	1	1	4	8	1	2	1	6	2	3		1	2	1	5	4				1	2	1	1	1	1	3	1	1				2		8										THAL SNS032 sgRNA vs. DRB empty	3.104	1.242	1.862	0.1765
1	1	1	6	3	1	1	3	1	11	1	2		1	1	1	1	2				1	1	3	1	3	3	5	2	4				1		1										THAL SNS032 sgRNA vs. DRB sgRNA	3.104	2.227	0.8776	0.1495
2	4	1	11	10	1	1	1	1	4	4	1		5	1	4	3	4				4	5	1	3	1	1	1	2	1				1		6										NPV2 empty vs. NPV2 sgRNA	1.343	2.549	-1.206	0.1603
1	1	1	10	2	7	1	1	1	9	1	6		1	1	2	1	1				9	3	18	1	4	4	4	1	5				1		1										NPV2 empty vs. DRB empty	1.343	1.242	0.1002	0.2048
1	1	1	4	2	8	1	1	1	7	2	3		5	5	2	8	1				8	1	5	1	1	1	1	1	2				1		1										NPV2 empty vs. DRB sgRNA	1.343	2.227	-0.884	0.1819
2	1	1	9	9	4	2	1	1	5	2	8		1	1	1	3	1				5	6	2	5	1	1	2	6	5				3		3										NPV2 sgRNA vs. DRB empty	2.549	1.242	1.306	0.189
2	2	1	1	1	5	2	1	1	4	3	1		1	2	6	3	1				9	7	4	1	1	1	2	1	3				1		1										NPV2 sgRNA vs. DRB sgRNA	2.549	2.227	0.3219	0.1639
1	1	1	4	1	4	1	1	1	3	5	7		1	1	1	6	1				1	8	4	1	9	9	10	1	3				1		1										DRB empty vs. DRB sgRNA	1.242	2.227	-0.9842	0.2076
1	1	8	4	2	1	1	5	1	4	5	2		1	1	23	1	4				3	1	4	2	1	1	1	7	1				1		4
1	1	1	11	7	7	1	1	1	4	1	9		1	1	1	6	12				4	1	4	1	2	2	1	5	1				3		1
1	1	1	6	5	1	6	1	2	6	3	1		1	1	5	3	4				7	4	3	1	1	1	1	1	1				8		4
1	1	1	1	6	2	1	1	2	5	1	2		1	1	2	7	14				1	2	1	1	1	1	1	8	5				3		6
6	1	2	4	4	7	1	2	2	7	3	1		1	1	4	1	1				2	4	2	2	1	1	4	6	4				2		1
1	1	4	4	11	2	2	1	1	6	3	2		1	1	2	1	11				1	1	1	1	1	1	1	1	8				4		5
2	1	2	3	2	8	1	1	1	7	4	7		1	1	3	4	4				6	1	5	2	1	1	1	10	3				2		1
2	1	1	3	1	3	1	1	2	4	1	3		1	1	1	4	2				1	1	10	1	1	1	1	1	8				4		6
1	2	1	11	9	1	3	1	1	4	6	4		1	2	2	8	6				2	1	3	1	2	2	6	1	1				1		2
1	8	1	1	9	1	4	1	1	1	3	2		1	1	2	11	1				1	10	2		1	1	2	1	7				5		7
1	2	1	5	7	6	1	1	1	1	7	3		1	1	1	2	1				1	4	6		2	2	3	7	5				3		8
1	1	1	2	8	4	1	1	2	4	7	2		2	2	1	2	2				1	1	3		1	1	1	4	1				3		1
1	2	1	1	4	2	1	1	1	1	1	1		1	1	8	1	1				7	7	3		1	1	10	1	3				1		1
1	1	1	20	8	1	1	1	1	1	8	7		3	1	1	4	6				1	3	2		1	1	1	2	2				1		6
1	1	1	6	1	5	1	1	1	3	6	8		1	1	1	1	3				4	1	3		2	2	1	16	5				2		6
5	1	2	4	8	1	1	1	1	1	2	5		1	1	5	1	3				1	3	2		1	1	5	1	1				1		3
2	2	1	4	1	5	3	1	2	6	7	11		1	1	6	6	7				2	1	5		1	1	4	6	1						3
1	2	1	5	9	4	1	2	1	5	10	2		1	2	2	10	2				4	1	3		2	2	6	3	1						1
1	1	3	21	6	2	1	2	3	6	2	6		1	2	6	3	6				3	1	1		1	1	1	7	4						5
1	1	1	1	3	4	1	1	1	4	14	2		1	1	1	3	6				1	1	7		1	1	1	2	2						6
1	1	1	8	6	3	1	2	2	1	1	5		1	2	1	2	3				4	1	1		1	1	1	1	2						2
1	1	1	11	5	7	4	2	1	1	7	1		1	1	7	7	1				7	6	2		1	1	1	1	1						3
2	1	1	1	5	9	2	1	2	8	1	6		1	1	1	3	5				4	3	4		2	2	1	2	3						2
1	1	1	3	9	1	1	1	1	1	7	7		1	1	12	1	7				1	1	1		1	1	2	3	7						3
1	1	1	3	4	5	1	1	1	4	1	1		2	1	7	1	1				2	3	1		1	1	1	6	1						3
1	1	2	2	2	3	1	1	1	8	1	5		1	1	1	4	3				6	5	4		1	1	1	1	4						4
1	1	1	6	1	8	1	1	1	1	3	7		2	2	1	1	6				8	1	8		1	1	1	1	5						1
3	1	1	6	6	4	1	2	1	1	1	8		1	2	2	1	4				1	1	4		1	1	1	1	6						4
1	1	2	1	3	7	1	1	4	1	3	6		1	1	2	1	6				1	7	4		1	1	4	5	3						1
1	1	1	5	9	4	1	1	1	1	6	8		1	1	2	6	6				1	4	6		1	1	7	3	2						1
2	1	1	1	12	7	2	3	1	10	4	1		1	1	2	1	1				2	2	1		1	1	2	4	5						1
1	1	1	4	3	10	1	2	2	1	1	1		1	1	1	4	2				1	3	4		1	1	2	8	3						1
1	1	1	6	1	10	2	3	1	4	1	4		1	1	1	2	4				3	1	2		1	1	4	3	5						2
1	3	1	6	1	6	2	2	1	7	3	5		2	1	8	5	6				4	1	1		1	1	2	4	4						1
1	1	5	4	2	8	2	3	1	2	3	8		1	1	1	8	4				5	7	1		1	1	13	2	4						6
1	1	4	3	5	4	1	1	1	1	1	4		1	1	1	6	3				8	3	1		1	1	1	2	2						3
1	1	4	5	10	5	2	4	1	6	3	1		1	1	5	4	1				6	4	10		1	1	3	3	3						1
1	2	1	2	5	1	1	1	1	1	1	2		1	1	2	1	1				4	1	1		1	1	3	1	7						2
1	3	1	6	2	2	2	1	3	1	1	1		1	1	5	6	2				6	5	1		1	1	6	2	2						1
1	1	1	5	9	2	1	1	2	5	2	1			1	8	1	1				8	4	1		1	1	1	7	2						1
1	1	1	5	10	2	1	1	2	6	1	6			1	7	5	2				8	1	1		2	2	1	1	4						4
1	4	1	1	3	1	1	1	1	1	1	5			1	1	3	1				2	1	4		2	2	6	4	3
1	4	2	6	16	4	1	1	1	4	4	1			1	1	1	2				1	1	5		1	1	2	1	1
3	1	1	7	8	5	1	1	1	7	5	12			1	5	4	3				2	1	1		1	1	1	4	1
1	1	1	13	9	9	1	1	5	8	5	2			1	4	10	3				1	8	7		1	1	10	1	3
3	1	3	10	3	6	1	1	2	1	3	9			1	4	1	1				1	2	1		1	1	2	6	4
2	1	1	8	7	6	1	1	1	5	6	3			1	2	2	2				4	4	1		1	1	6	5	6
1	2	1	6	6	3	1	1	1	3	6	6			2	10	6	9				1	9	2		1	1	4	3	4
2	2	8	10	4	7	1	1	1	4	7	1			1	4	1	2				2	4	3		2	2	1	6	2
2	1	1	7	3	4	2	1	2	7	1	4			1	1	1	1				6	3	4		2	2	1	3	3
1	1	1	1	7	1	2	1	2	4	4	5			1	5	2	5				7	5	6		1	1	2	3	2
1	1	1	11	1	4	1	1	2	8	7	3			1	1	5	3				1	7	6		2	2	1	4	1
1	1	1	6	2	6	1	1	1	9	1	2			4	6	5	5				2	1	8		2	2	6	8	1
1	1	1	5	5	2	1	2	2	3	5	1			2	1	3	3				3	2	1		2	2	5	1	8
1	1	1	7	4	9	1	1	1	16	1	2			1	1	1	11				1	3	6		1	1	1	1	2
2	1	1	1	8	3	1	1	1	1	3	4			2	3	10	1				1	3	7		1	1	1	6	4
1	2	1	3	6	8	1	1	2	3	4	8			1	1	1	8				8	1	21		1	1	1	10	7
1	1	1	3	9	1	1	1	1	6	1	10			1	1	1	2				5	1	6		1	1	12	7	4
1	1	1	2	3	1	1	2	1	1	9	2			1	6	1	2				2	8	11		1	1	1	1	2
2	2	1	1	8	5	1	2	2	1	3	1			1	5	1	2				7	1	2		5	5	1	8	1
5	1	2	2	2	15	1	1	2	1	7	9			1	4	2	5				4	5	4		1	1	1	2	3
1	2	1	9	8	1	1	2	1	5	12	2			2	1	2	1				6	3	8		1	1	1	1	6
1	1	2	3	1	5	1	1	1	4	14	3				1	1	2				1	6	5		2	2	4	2	4
1	2	1	6	2	6	1	1	1	2	8	7				1	3	1				1	6	2		4	4	6	5	5
1	1	2	10	11	11	1	1	1	4	1	8				2	5	2				1	1	1		3	3	1	5	3
2	1	1	8	5	8	1	1	1	7	1	1				2	1	2				9	1	4		1	1	1	1	1
1	1	2	10	2	1	1	1	2	1	1	1				1	5	4				1	4	1		1	1	1	1	3
1	1	1	4	5	11	1	1	1	3	3	11				1	2	1				7	9	9		1	1	3	2	2
1	1	1	8	8	3	1	3	1	7	5	2				11	6	4				2	2	2		2	2	1	1	1
1	3	1	3	11	7	2	1	1	4	4	1				2	5	7				2	3	8		1	1	7	1	5
1	1	1	7	4	4	1	1	2	8	2	3				6	3	1				7	8	7				1	5	2
1	2	1	3	11	1	1	1	1	4	7	6				3	3	1				3	1	4				1	2	3
1	3	1	7	2	3	1	1	2	5	1	1				2	5	4				1	6	9				3	2	9
1	1	1	2	6	9	1	2	1	7	4	2				1	1	1				3	1	3				2	2	1
1	1	1	4	1	1	1	1	1	4	1	5				2	1	2				4	4	1				2	2	1
1	1	2	8	1	13	1	1	1	10	6	2				1	10	1				3	1	9				3	3	2
1	1	1	6	3	11	3	1	1	8	2	2				5	9	1				5	4	6				5	3	1
1	2	2	1	6	7	1	1	1	1	3	7				1	2	1				3	1	8				1	2	1
1	1	4	1	5	1	2	1	1	2	3	5				6	6	1				1	3	1				1	4	4
2	2	1	1	3	2	1	1	1	4	2	5				4	8	1				1	5	1				2	4	2
1	1	1	6	1	3	1	2	1	1	3	2				2	1	5				3	1	5				1	3	1
1	1	2	4	7	7	1	1	1	1	3	5				3	5	1				2	2	8				2	3	7
2	2	1	1	3	6	1	1	1	3	5	2				4	1	3				1	1	1				2	6	1
2	1	1	8	1	1	1	2	4	8	1	4				7	8	5				5	2	1				5	1	4
1	1	1	1	4	5	1	1	1	8	9	3				1	7	1				2	1	1				3	3	2
1	1	1	3	1	2	4	1	1	5	6	4				1	1	1				3	8	3				2	2	1
1	6	3	5	1	7	1	1	1	2	1	7				3	3	2				3	7	2				9	8	1
1	1	3	5	1	3	1	1	1	5	10	5				1	9	3				3	9	11				1	4	1
1	1	1	4	1	5	1	1	1	1	1	9				3	3	9				2	5	11					5	6
1	1	1	3	5	1	1	3	1	4	4	3				8	1	5				2	2	1					1	2
1	1	2	2	1	1	1	1	5	4	2	6				5	1	4				2	10	12					1	5
1	2	1	6	5	10	2	1	1	6	1	2				12	5	3				6	1	1					3	1
1	1	5	8	3	5	1	1	1	9	3	2				4	1	4				7	4	1					2	1
1	1	1	1	1	7	1	1	1	1	2	1				4	2	4				6	5	4					2	1
2	1	2	5	1	6	2	1	1	5	14	1				4	2	3				5	8	3					1	1
1	1	1	14	3	10	1	3	1	9	3	3				4	7	1				1	4	1					5	2
1	3	1	1	5	6	8	2	1	5	3	1				1	2	5				5	3	1					6	1
1	1	1	3	4	1	1	1	2	1	5	6				5	7	1				5	1	2					4	2
1	1	1	6	9	1	1	1	1	5	1	1				7	7	2				5	2	4					2	2
1	1	2	8	3	3	1	1	2	6	8	1				1	8	5				3	3	2					8	3
1	2	1	5	1	1	1	1	1	1	3	2				5	1	2				1	9	1					1	1
1	2	1	1	3	1	1	1	1	2	3	2				4	2	6				5	3	6					3	5
1	2	1	1	7	1			3	11	2	1				3	3	1				3	4	13					1	8
1	1	1	7	9	9			2	8	5	5				5	5	5				3	6	1					5	8
1	2	2	1	5	6			1	9	6	1				7	1	6				3	5	6					1	9
1	1	1	8	2	3			1	5	8	4				10	4	5				1	8	6					1	1
1	1	1	6	8	1			2	2	2	1				1	3	1				1	1	1					4	4
1	1	1	9	1	4			1	1	2	1				3	7	2				1	2	5					1	1
1	5	2	14	7	9			1	2	6	9				3	1	1				1	1	9					1	1
2	1	1	5	2	6			3	1	2	1				1	1	1				3	1	6					9	1
1	1	1	1	1	5			1	5	2	1				8	6	3				9	3	5					1	1
2	1	1	3	8	4			1	2	5	1				10	3	4				4	6	5					6	2
1	1	1	11	1	9			1	1	5	1				3	1	7				1	2	2					6	3
1	1	1	3	1	3			2	2	2	2				3	1	1				4	2	1					1	2
1	1	1	5	3	1			1	13	2	1				1	2	5				6	1	3					6	4
1	6	1	10	5	1			1	8	4	2				3	1	9				1	12	2					1	3
1	3	1	1	1	5			1	2	1	2				3	3	4				3	1	2					1	4
9	1	1	4	5	8			1	5	2	1				2	1	7				2	4	3					6	4
1	1	1	7	1	6			1	3	1	2				4	1	1				1	1	3					5	1
2	2	1	3	5	7			1	1	4	1				6	5	4				3	5	8					2	5
1	1	1	1	2	3			1	6	9	3				4	1	1				4	6	1					2	4
	2	1	11	2	4			1	2	3	4				1	1	5				7	1	2					6	3
	1	1	8	2	2			1	11	1	11				1	2	5				1	3	2					2	6
	2	2	6	9	1			1	8	8	7				4	3	3				1	2	6					1	6
	1	1	12	1	3			1	5	1	4				4	5	1				3	5	5					2	7
	2	1	10	2	7			1	8	1	1				6	2	1				2	1	7					1	11
	1	1	7	2	6			2	11	1	3				2	1	2				1	1	4					1	3
	1	1	3	2	5			1	5	2	2				6	1	6				2	2	5					3	4
	1	1	3	14	1			1	6	5	5				7	1	1				2	3	3					5	4
	1	1	1	6	2			1	4	3	6				2	1	5				1	7	1					3	1
	1	1	8	7	3			1	1	1	3				1	2	1				1	2	3					1	3
	1	1	5	5	5			1	1	13	1				2	1	4				2	2	1					1	2
	3	1	6	9	1			1	1	2	8				3	4	1				2	11	2					7	8
	1	1	7	6	3			1	2	11	6				6	4	1				4	2	7					2	2
	1	1	5	7	1			1	2	5	6				7	4	6				1	5	3					3	2
	1	1	7	1	10			4	7	6	1				6	1	1				1	5	9					1	9
	1	2	1	15	1			1	7	7	3				1	3	1				2	1	2					3	2
	1	2	9	2	1			1	6	1	7				9	3	1				6	5	3					2	4
	1	1	5	21	1				1	8	9				2	6	1				1	11	2					2	3
	1	1	1	5	2				5	5	6				1	6	2				1	7	1					3	6
	1	2	1	5	6				6	1	3				2	5	1				12	2	3					1	9
	2	1	9	6	1				9	8	5				2	5	1				1	2	3					1	1
	2	1	5	1	1				1	8	2				1	1	1				1	1	5					1	1
	1	1	11	6	7				1	8	1				6	1	2				2	1	3					6	1
	2	1	1	8	1				1	5	5				7	1	5				9	1	1					4	5
	1	3	6	3	8				6	1	4				4	3	1				2	5	7					3	3
	4	1	1	2	13				7	2	3				6	5	1				2	6	3					2	2
	1	1	11	9	5				8	11	3				4	1	3				1	4	3					7	3
	1	1	5	6	1				25	12	3				2	2	1				2	1	2					3	2
	1	1	4	4	6				7	1	1				6	2	6				1	2	3					1	1
	3	2	1	4	3				6	13	1				11	5	1				2	1	1					3	4
	3	1	14	9	3				5	8	8				7	7	1				5	7	3					4	2
	1	1	4	3	7				4	4	2				7	3	5				3	3	4					1	6
	5	1	13	11	6				2	7	1				15	4	1				5	1	3					6	4
	1	1	7	4	3				5	10	3				6	1	1				1	1	1					1	1
	1	1	7	8	5				2	2	11				8	2	4				1	5	1					7	3
	1	2	4	7	2				6	1	8				1	5	6				1	7	5					1	1
	2	1	1	1	8				8	2	3				7	1	1				1	1	3					5	1
	2	1	1	2	9				1	1	2				3	2	3				1	1	1					1	1
	1	1	3	3	3				4	4	3				2	1	4				6	1	7					7	11
	1	1	8	13	7				2	7	12				6	3	1				2	1	1					3	1
	3	2	1	2	3				5	2	3				1	1	1				1	5	1					6	1
	2	1	3	5	10				3	3	12				8	5	2				1	1	1					3	4
		1	1	5	1				3	10	6				1	4	6				1	1	1					7	2
		1	7	4	6				1	1	4				1	7	1				1	1	10					3	2
		1	10	5	2				5	9	12				4	1	1				5	6	1					4	1
		2	1	2	5				1	8	8				6	1	7				3	7	1					1	7
		1	6	1	6				2	2	13				1	1	1				2	1	1					1	1
		1	9	2	6				5	1	1				1	1	2				1	1	3					1	5
		1	2	4	2				4	8	5				9	10	5				1	1	1					1	2
		1	5	7	3				6	3	1				4	6	1				7	4	2					1	1
		1	7	4	3				1	1	4				1	1	2				1	2	1					5	1
		1	2	6	10				4	1	4				5	5	5				5	5	6					1	4
		1	3	2	1				1	1	2				1	3	1				1	10	8					2	5
		1	1	1	5				1	5	3				4	7	3				8	4	2					1	1
		1	9	1	3				4	9	3				5	12	1				1	1	9					2	3
		1	4	1	2				2	5	1				3	1	13				1	1	1					3	5
		1	1	4	1				2	2	11				4	3	1				3	1	4					9	9
		1	2	1	3				15	4	4				3	7	2				1	1	1					8	3
		2	4	6	8				13	1	6				4	4	2				3	7	1					1	3
		1	2	2	5				4	13	10				4	5	1				3	1	2					2	7
		1	1	12	1				1	6	1				12	5	1				4	6	2					5	4
		1	2	12	3				17	2	6				1	1	4				1	1	2					17	8
		1	1	8	5				5	2	7				9	4	1				1	4	2					1	5
		1	12	7	4				2	1	1				1	3	2				7	1	1					1	8
		1	8	5	7				1	3	7				1	1	6				5	6	2					1	1
		3	1	1	2				10	2	1				4	3	2				1	1	6					2	1
		1	4	2	7				8	1	1				1	1	3				9	1	4					3	6
		1	7	8	4				3	1	2				4	3	1				1	1	4					1	4
		1	4	8	10				2	5	1				3	8	1				2	2	4					1	3
		1	1	9	1				2	2	3				1	1	1				1	6	5					1	5
		1	9	6	10				1	1	6				12	2	4				2	2	1					1	3
		1	1	8	7				5	11	2				3	1	6				11	5	6					3	8
		1	9	10	4				7	1	7				3	5	1				6	2	6					7	10
			4	4	1				8	1	1				5	2	9				1	4	1					3	1
			1	3	5				6	1	7				1	6	1				2	2	1					6	3
			1	7	1				9	6	2				3	9	3				2	9	6					6	1
			8	1	11				4	4	6				1	1	3				1	1	5					3	2
			2	1	5				5	1	4				5	14	4				1	1	1					5	1
			5	4	4				2	5	8				6	2	7				4	2	6					2	1
			7	4	4				10	2	7				1	6	1				4	3	5					6	2
			14	4	4				2	5	2				6	2	5				1	2	4					6	3
			8	5	2				2	1	6				4	1	1				1	3	6					6	4
			7	5	8				5	1	1				4	3	1				1	3	2					1	1
			7	6	1				2	6	6				3	3	5				6	1	2					1	1
			1	1	1				10	1	6				1	2	3				4	7	1					4	1
			8	4	3				6	12	3				1	6	1				6	1	1					2	4
			8	1	2				8	1	5				2	3	1				1	1	1					3	2
			7	2	1				8	7	3				10	2	4				1	3	3					2	2
			2	6	3				3	1	7				1	5	8				4	7	6					3	8
			3	9	1				4	2	3				7	1	1				1	6	1					7	8
			8	4	3				7	10	9				1	3	1				1	9	1					2	2
			5	1	3				1	5	1				4	1	3				1	1	4					1	7
			4	8	7				8	5	1				1	8	2				1	1	6					2	7
			9	2	1				7	5	6				1	1	2				2	4	9					1	11
			6	1	1				5	9	8				3	2	12				1	1	1					6	5
			5	3	12				6	4	9				4	3	11				1	2	6					2	1
			8	1	1				1	6	5				8	1	1				2	2	7					1	7
			4	1	3				3	4	8				3	1	3				8	8	2					1	1
			9	7	5				1	2	1				5	1	1				1	6	1					2	1
			10	5	5				4	1	3				2	3	2				1	1	2					3	6
			8	1	1				4	1	2				1	4	1				2	5	12					1	6
			2	1	1				1	5	1				5	7	1				1	5	2					3	7
			1	5	3				4	3	1				1	8	4				7	4	1					3	3
			6	2	4				3	1	8				1	4	4				3	4	6					4	2
			6	4	1				1	1	10				1	1	3				2	1	1					1	6
			2	1	1				13	1	5				11	26	1				1	1	3					1	4
			1	1	3				6	5	3				1	2	1				2	1	1					3	4
			5	1	4				1	5	1				2	6	1				2	1	3					1	1
			3	8	4				3	3	1				2	1	1				1	1	10					2	3
			3	4	1				1	1	3				4	1	3				1	4	1					1	1
			4	1	3				5	1	4				1	6	2				1	2	1					1	1
			5	4	2				4	1	1				4	2	1				1	1	1					2	2
			1	15	1				7	5	1				2	2	1				2	1	3					3	3
			9	1	9				1	3	8				1	2	1				8	1	1					1	2
			1	8	4				2	3	15				7	5	1				2	7	9					1	4
			3	1	4				6	1	2				1	2	1				1	1	1					1	4
			11	1	8				5	2	13				4	5	4				7	1	6					1	7
			1	6	2				3	1	21				1	2	2				3	1	2					1	3
			6	8	1				8	1	3				2	2	1				2	4	3					3	7
			7	3	3				5	3	8				9	17	5				1	3	1					1	3
			1	1	5				1	2	2				1	4	1				1	4	1					5	3
			5	6	7				2	1	8				4	12	7				1	3	2					1	1
			1	2	2				7	1	2				3	1	1				4	2	1					4	1
			7	3	16				7	1	2				6	7	1				2	1	1					6	10
			4	3	2				8	10	8				1	5	3				1	1	13					1	1
			4	1	1				4	1	1				1	2	3				1	7	8					4
			9	2	3				7	12	6				1	5	3					1	8					1
			7	5	1				8	1	3				3	4	7					3	9					3
			5	1	7				9	1	3				4	1	10					1	4					3
			9	4	2				4	3	6				1	8	5					1	4					1
			6	1	2				2	6	9				11	1	1					1	1					4
			4	3	5				3	2	4				1	4	6					3	3					2
			2	7	2				9	2	1				2	1	8					6	2					1
			5	7	3				3	1	7				2	2	1					3	6					1
			4	7	5				3	1	8				3	3	4					1	5					1
			2	2	1				1	6	8				2	5	8					1	10					2
			4	2	1				6	3	6				7	1	1					1	12					1
			2	4	12				4	3	10				7	2	1					2	2					8
			2	1	3				1	2	2				5	5	1					2	2					2
			1	6	8				4	12	8				6	2	3					1	2					2
			4	6	2				6	2	1				5	6	5					3	2					2
			1	4	1				2	5	9				6	2	5					3	4					1
			1	2	2				4	5	7				1	9	1					1	5					7
			4	5	6				3	4	4				1	1	5					6	2					2
			4	3	4				5	1	1				3	2	4					3	4					1
			1	11	6				4	9	5				2	1	1					2	1					2
			6	4	8				4	6	7				3	3	5					3	1					1
			5	6	6				2	8	1				4	1	2					1	3					1
			12	3	2				3	1	3				1	2	6					1	5					3
			1	7	7				3	10	1				3	3	6					2	1					3
			2	4	5				5	2	8				2	1	1					8	10
			4	4	5				8	1	5				7	8	6					1	2
			3	3	1				5	1	2				3	2	1					6	1
			8	3	2				6	2	9				3	1	4					5	6
			3	8	1				6	3	1				3	6	3					1	1
			5	2	1				2	4	1				13	6	2					5	4
			1	4	1				10	1	2				2	2	5					8	1
			1	1	4				6	6	3				4	4	1					4	1
			1	6	1				1	6	2				6	8	13					1	11
			6	2	1				3	1	5				16	2	7					1	2
			1	1	7				5	5	7				7	4	2					1	1
			11	1	8				4	1	2				2	1	2					1	11
			1	7	7				2	3	5				1	8	5					3	1
			6	2	1				6	10	1				1	1	1					2	2
			11	8	13				1	1	7				2	2	1					4	1
			2	4	1				5	3	5				1	3	1					12	2
			9	2	2				2	8	6				4	1	2					2	4
			6	2	7				5	9	5				2	1	5					3	6
			5	4	1				1	5	3				1	1	5					1	4
			4	3	10				3	7	5				1	2	3					4	6
			5	1	1				2	2	1				6	5	1					9	8
			9	1	5				1	3	8				1	1	7					6	2
			3	3	1				3	7	6				3	2	5					4	1
			3	2	7				13	3	6				2	1	2					4	1
			11	2	1				1	13	1				7	3	1					2	2
			12	8	1				12	3	5				6	5	5					1	1
			5	4	7				1	9	1				4	1	1					2	1
			5	6	5				1	2	8				6	2	1					3	7
			2	5	1				1	5	1				10	2	1					2	7
			4	1	1				2	1	4				1	7	6					2	1
			8	5	11				1	6	8				4	5	1					4	1
			9	6	3				2	1	2				1	3						3	6
			4	7	1				5	1	1				4	1						1	3
			7	1	1				1	1	1				1	5						5	2
			4	9	10				1	3	1				2	6						3	3
			6	1	6				2	7	2				4	1						1	1
			4	3	4				1	1	4				1	7						1	1
			1	8	5				1	4	7				2	1						2	1
			3	1	1				1	4	5				1	1						1	1
			7	1	1				2	2	10				1	1						7	4
			1	9	4				1	9	8				6	5						3	1
			5	1	1				1	3	2				8	1						2	1
			8	3	1				5	7	3				3	5						2	2
			5	1	9				1	1	8				5	6						1	5
			5	1	5				10	6	6				4	3						2	5
			7	1	1				6	9	1				1	3						10	1
			5	2	1				8	2	4				5	1						1	1
			1	2	5				10	1	2				3	5						3	5
			1	5	1				3	4	7				1	1						2	1
			4	6	2				6	1	1				1	8						3	3
			1	16	2				4	2	4				1	5						1	4
			2	5	5				3	8	1				1	1						1	1
			1	7	1				2	6	5				2	6						4	1
			11	8	11				1	1	7				11							2	1
			1	7	8				1	8	3				1							1
			8	1	1				4	4	7				6
			2	3	5				1	10	1				1
			6	2	1				1	10	5				1
			1	2	1				24	1	5				3
			1	3	12				2	7	6				5
			6	5	6				5	8	2				7
			3	1	1				1	3	7				3
			7	5	2				5	1	7				1
			1	7	4				4	4	5				1
			6	3	7				2	1	4				2
			3	5	6				6	8	1				1
			4	5	9				2	1	5				2
			5	1	4				10	8	3				6
			6	1	7				5	2	1				1
			7	1	7				8	6	1				6
			1	6	1				9	1	1				4
			10	3	5				14	5	1				6
			5	7	8				1	4	1				6
			6	4	6				2	4	1				1
			4	5	4				4	7	5				1
			4	6	6				8	1	4				3
			4	7	2				6	1	5				2
			1	2	1				10	2	1				3
			2	1	1				6	2	8				3
			4	1	3				1	2	7				4
			2	6	1				6	1	5				1
			5	2	2				7	2	2				5
			7	3	5				3	3	10				5
			1	7	3				9	3	1				1
			15	3	2				6	4	5				4
			1	8	7				1	4	1				1
			3	1	1				7	1	1				3
			2	5	1				6	2	2				3
			4	7	1				3	7	1				2
			5	4	1				3	6	4				6
			2	3	1				1	10	1				3
			5	3	2				5	4	1				5
			1	2	7				5	5	7				3
			6	9	6				6	2	1				4
			2	4	2				8	1	7				6
			2	11	6				2	8	3				1
			8	1	1				5	6	1				3
			1	2	1				1	3	4				2
			3	3	6				2	3	1				5
			2	5	6				10	3	9				2
			1	1	2				9	1	5				3
			6	1	21				1	1	11				6
			1	4	4				8	1	3				1
			10	1	3				2	6	4				1
			6	1	5				1	8	5				1
			6	1	5				2	3	1				1
			2	2	2				7	1	9				6
			6	8	4				5	12	4				1
			4	9	1				1	1	2				8
			6	5	4				7	4	4				6
			1	3	1				7	2	4				8
			5	2	1				4	2	1				4
			4	7	2				15	5	1				10
			2	1	1				1	1	1				6
			10	3	3				5	4	8				4
			5	1	4				1	2	4				8
			1	5	3				1	2	2				6
			2	6	1				2	1	3				2
			3	1	2				2	5	1				1
			4	3	7				3	1	1				1
			1	6	3				2	1	1				4
			11	1	3				2	7	8				4
			6	8	1				2	4	6				4
			8	8	4				5	2	1				2
			1	7	2				4	1	1				4
			4	5	5				7	1	9				6
			8	1	5				6	1	18				6
			2	5	7				1	3	4				2
			3	4	1				14	8	3				5
			5	11	4				4	8	3				4
			3	4	1				1	7	4				6
			1	1	1				1	11	1				4
			14	9	6				1	1	1				2
			8	2	1				1	7	3				1
			9	1	6				1	6	8				3
			1	2	6				2	1	4				2
			6	2	1				1	3	1				7
			3	5	1				4	8	1				2
			1	1	7				3	3	4				1
			6	2	1				2	12	1
			4	4	1				13	1	6
			4	7	7				2	1	2
			2	1	4				8	4	1
			2	1	3				10	7	5
			4	1	12				7	4	1
			10	1	8				2	8	4
			7	1	1				1	6	3
			1	3	1				1	2	1
			4	5	3				1	4	6
			4	10	1				1	3	2
			2	4	1				7	1	2
			7	1	2				8	1	3
			2	1	1				1	1	6
			8	5	6				1	3	1
			7	4	3				7	6	1
			4	7	1				4	8	1
			7	1	1				8	5	4
			5	9	3				1	1	1
			5	2	1				1	5	4
			1	1	2				13	1	4
			4	5	2				2	6	2
			1	6	2				4	1	3
			5	2	2				1	7	1
			3	5	1				5	2	2
			2	2	6				7	10	5
			6	1	1				4	1	3
			8	3	4				2	1	1
			6	2	5				1	5	3
			5	10	2				1	7	1
			1	1	3				4	1	2
			4	3	1				2	2	1
			6	1	2				1	16	7
			4	3	1				3	1	1
			5	6	1				2	3	2
			2	4	2				2	8	1
			7	1	5				7	4	1
			9	8	1				1	10	4
			7	1	6				3	1	5
			5	1	6				1	7	1
			4	4	9				1	8	4
			3	1	1				1	1	9
			14	1	8				3	7	5
			6	7	5				1	1	4
			1	3	8				2	9	1
			8	10	7				3	9	10
			4	1	12				1	10	1
			2	12	1				2	14	3
			6	4	1				5	5	1
			1	6	1				1	1	1
			5	8	4				5	4	3
			6	5	1				1	1	1
			1	5	3				1	1	6
			4	7	7				2	2	5
			2	3	9				1	1	6
			5	5	3				8	5	2
			5	1	9				2	3	3
			10	1	1				3	2	2
			1	6	1				5	2	2
			2	2	9				5		1
			1	2	2				1		3
			3	7	2				1		3
			1	1	2				1		4
			1	7	11				4		4
			2	7	13				1		1
			2	4	4				7		7
			1	2	5				2		4
			5	10	5				6		11
			1	1	6				1		2
			9	1	10				2		1
			2	7	1				4		1
			4	1	1				4		1
			3	5	1				8		2
			1	4	2				9		1
			4	10	2				2		2
			2	1	8				4		7
			1	3	3				9		8
			1	1	9				6		3
			4	1	5				3		1
			5	5	4				5		3
			4	2	1				2		1
			5	1	1				1		4
			4	3	10				5		1
			6	5	1				7		1
			2	1	2				6		5
			5	5	2				1		1
			8	10	9				7		3
			3	2	1				5		1
			6	1	3				2		1
			4	5	2				3		8
			2	1	3				11		1
			5	7	3				3		1
			8	1	1				1		1
			5	1	1				9		8
			3	6	6				8		1
			1	4	6				2		8
			1	2	1				6		13
			10	2	1				6		11
			3	5	3				5		8
			2	10	2				5		4
			1	1	3				1		3
			1	7	1				8		13
			1	1	6				3		1
			2	1	2				7		3
			3	6	14				4		3
			7	1	1				10		1
			4	1	1				5		1
			1	1	1				7		1
			2	3	1				8		2
			3	3	2				7		8
			2	6	12				6		4
			5	4	1				6		8
			1	1	4				11		4
			1	6	3				7		6
			1	7	1				8		10
			9	5	1				8		1
			1	8	1				8		4
			3	4	1				2		7
			3	10	1				3		1
			1	5	2				7		4
			4	7	1				7		4
			4	1	4				8		3
			9	2	9				1		1
			6	4	2				8		5
			6	1	2				3		2
			4	1	5				4		3
			1	6	11				4		1
			10	3	10				5		2
			5	1	4				7		3
			9	4	2				6		5
			9	1	7				1		9
			4	2	5				2		4
			10	1	2				1		8
			1	4	2						17
			2	3	15						2
			1	8	3						10
			2	8	5						4
			1	6	1						3
			2	5	2						2
			9	4	1						1
			7	1	5						1
			5	1	1						5
			5	1	3						6
			6	1	2						1
			8	1	3						1
			3	10	5						2
			6	1	2						2
			2	2	4						2
			6	7	2						2
			6	6	2						1
			5	2	2						5
			5	6	12						3
			1	2	6						6
			2	6	3						1
			3	1	2						9
			4	1	5						5
			1	9	2						8
			7	1	5						3
			2	2	1						7
			6	2	10						1
			1	1	1						1
			4	2	1						2
			1	8	1						2
			1	1	2						5
			9	3	3						3
			5	2	4						1
			1	2	1						5
			2	4	8						7
			1	7	1						11
			9	5	1						1
			8	1	2						4
			6	8	4						4
			1	3	2						3
			1	1	1						1
			5	1	3						1
			8	7	4						5
			5	3	1						8
			6	5	14						1
			2	2	3						6
			6	6	11						2
			6	4	10						9
			2	2	1						4
			10	1	2						5
			1	1	2						1
			7	3	2						2
			2	1	1						2
			1	10	3						6
			10	2	8						5
			5	4	7						5
			2	8	2						8
			4	1	9						6
			7	6	1						2
			2	9	6						6
			3	3	2						4
			2	6	1						6
			1	3	1						1
			4	5	7						5
			1	1	7						7
			1	8	4						5
			1	1	8						3
			1	1	2						2
			13	5	4						2
			5	6	3						5
			6	5	4						1
			1	1	2						1
			2	1	3						1
			2	1	2						3
			2	3	5						5
			4	2	2						2
			4	7	6						3
			1	6	6						5
			8	1	3						1
			6	4	6						1
			1	2	2						1
			4	1	4						6
			1	4	4						3
			3	2	12						1
			2	1	1						2
			1	8	3						6
			11	1	1						5
			6	1	3						1
			7	3	1						8
			2		1						1
			1		7						1
			8		5						8
			1		9						5
			7		8						7
			3		2						3
			1		8						2
			5		9						4
			1		11						8
			7		3						2
			1		10						7
			7		2						1
			1		10						2
			3		4						4
			3		8						2
			4		2						7
			7		5						3
			4		1						2
			5		2						5
			4		4						1
			4		1						5
			8		4						3
			2		16						4
			3		3						4
			3		5						6
			4		1						1
			3		5						3
			1		5						1
			5		3						6
			1		5						8
			4		2						4
			5		1						1
			4		3						1
			1		1						7
			7		7						4
			4		10						3
			2		4						3
			2		3						1
			5		5						1
			1		7
			1		4
			6		6
			4		1
			8		2
			1		4
			5		10
			1		1
			5		5
			1		8
			5		1
			1		1
			5		1
			4		1
			2		1
			4		5
			7		1
			9		5
			7		3
			6		3
			9		1
			9		2
			4		7
			1
			6
			8
			8
			1
			8
			7
			7
			1
			6
			5
			5
			4
			3
			1
			4
			7
			6
			3
			3
			6
			4
			6
			9
			14
			1
			5
			1
			1
			1
			1
			4
			8
			5
			8
			4
			1
			1
			1
			1
			1
			1
			1
			3
			1
			6
			3
			4
			6
			1
			3
			1
			12
			3
			14
			11
			1
			13
			4
			10
			1
			6
			11
			9
			5
			6
			4
			8
			2
			2
			5
			2
			1
			8
			9
			4
			3
			6
			6
			4
			6
			1
			2
			4
			1
			7
			10
			1
			9
			14
			1
			5
			1
			7
			5
			8
			2
			1
			7
			2
			10
			2
			9
			3
			5
			7
			1
			8
			9
			3
			1
			8
			10
			1
			3
			1
			7
			5
			1
			6
			1
			5
			3
			4
			8
			8
			2
			6
			10
			10
			12
			8
			9
			8
			8
			1
			3
			14
			6
			7
			8
			4
			3
			2
			1
			2
			4
			5
			1
			6
			2
			1
			3
			6
			1
			3
			2
			5
			5
			1
			2
			1
			3
			8
			1
			4
			8
			2
			8
			4
			2
			3
			1
			6
			1
			6
			1
			7
			18
			5
			1
			3
			5
			5
			1
			1
			1
			3
			3
			5
			5
			2
			4
			4
			1
			2
			6
			3
			7
			1
			7
			1
			6
			5
			1
			6
			1
			5
			4
			4
			7
			1
			3
			4
			6
			2
			3
			6
			1
			3
			6
			2
			4
[truncated: 2 more columns]

## Sheet: Fig. 2m
DMSO empty			DMSO sgRNA			THZ1 0,1uM empty			THZ1 0,1uM sgRNA			THZ1 1uM empty			THZ1 1uM sgRNA			TZH531 empty			THZ531 sgRNA			THAL SNS032 empty			THAL SNS032 sgRNA			NPV2 empty			NPV2 sgRNA			DRB empty			DRB sgRNA
353.092	324.55	309.384	311.53	324.541	308.81	254.285	245.71	242.88	249.52	249.153	251.415	180.607	179.429	180.839	180.263	177.32	178.904	259.28	251.765	259.899	264.071	256.867	268.755	254.856	249.635	270.053	283.494	256.967	275.948	226.561	231.456	233.52	240.375	243.429	261.127	242.194	244.764	240.913	249.192	253.732	235.818
Number of families	1
Number of comparisons per family	91
Alpha	0.05
Tukey's multiple comparisons test	Mean Diff,	95,00% CI of diff,	Below threshold?	Summary	Adjusted P Value
DMSO empty vs. DMSO sgRNA	14.05	-13,47 to 41,57	No	ns	0.8261	A-B
DMSO empty vs. THZ1 0,1uM empty	81.38	53,86 to 108,9	Yes	****	<0,0001	A-C
DMSO empty vs. THZ1 0,1uM sgRNA	78.98	51,46 to 106,5	Yes	****	<0,0001	A-D
DMSO empty vs. THZ1 1uM empty	148.7	121,2 to 176,2	Yes	****	<0,0001	A-E
DMSO empty vs. THZ1 1uM sgRNA	150.2	122,7 to 177,7	Yes	****	<0,0001	A-F
DMSO empty vs. TZH531 empty	72.03	44,50 to 99,55	Yes	****	<0,0001	A-G
DMSO empty vs. THZ531 sgRNA	65.78	38,25 to 93,30	Yes	****	<0,0001	A-H
DMSO empty vs. THAL SNS032 empty	70.83	43,30 to 98,35	Yes	****	<0,0001	A-I
DMSO empty vs. THAL SNS032 sgRNA	56.87	29,35 to 84,40	Yes	****	<0,0001	A-J
DMSO empty vs. NPV2 empty	98.5	70,97 to 126,0	Yes	****	<0,0001	A-K
DMSO empty vs. NPV2 sgRNA	80.7	53,18 to 108,2	Yes	****	<0,0001	A-L
DMSO empty vs. DRB empty	86.39	58,86 to 113,9	Yes	****	<0,0001	A-M
DMSO empty vs. DRB sgRNA	82.76	55,24 to 110,3	Yes	****	<0,0001	A-N
DMSO sgRNA vs. THZ1 0,1uM empty	67.34	39,81 to 94,86	Yes	****	<0,0001	B-C
DMSO sgRNA vs. THZ1 0,1uM sgRNA	64.93	37,41 to 92,45	Yes	****	<0,0001	B-D
DMSO sgRNA vs. THZ1 1uM empty	134.7	107,1 to 162,2	Yes	****	<0,0001	B-E
DMSO sgRNA vs. THZ1 1uM sgRNA	136.1	108,6 to 163,7	Yes	****	<0,0001	B-F
DMSO sgRNA vs. TZH531 empty	57.98	30,46 to 85,50	Yes	****	<0,0001	B-G
DMSO sgRNA vs. THZ531 sgRNA	51.73	24,21 to 79,25	Yes	****	<0,0001	B-H
DMSO sgRNA vs. THAL SNS032 empty	56.78	29,26 to 84,30	Yes	****	<0,0001	B-I
DMSO sgRNA vs. THAL SNS032 sgRNA	42.82	15,30 to 70,35	Yes	***	0.0003	B-J
DMSO sgRNA vs. NPV2 empty	84.45	56,93 to 112,0	Yes	****	<0,0001	B-K
DMSO sgRNA vs. NPV2 sgRNA	66.65	39,13 to 94,17	Yes	****	<0,0001	B-L
DMSO sgRNA vs. DRB empty	72.34	44,81 to 99,86	Yes	****	<0,0001	B-M
DMSO sgRNA vs. DRB sgRNA	68.71	41,19 to 96,24	Yes	****	<0,0001	B-N
THZ1 0,1uM empty vs. THZ1 0,1uM sgRNA	-2.404	-29,93 to 25,12	No	ns	>0,9999	C-D
THZ1 0,1uM empty vs. THZ1 1uM empty	67.33	39,81 to 94,86	Yes	****	<0,0001	C-E
THZ1 0,1uM empty vs. THZ1 1uM sgRNA	68.8	41,27 to 96,32	Yes	****	<0,0001	C-F
THZ1 0,1uM empty vs. TZH531 empty	-9.356	-36,88 to 18,17	No	ns	0.9902	C-G
THZ1 0,1uM empty vs. THZ531 sgRNA	-15.61	-43,13 to 11,92	No	ns	0.7104	C-H
THZ1 0,1uM empty vs. THAL SNS032 empty	-10.56	-38,08 to 16,97	No	ns	0.9735	C-I
THZ1 0,1uM empty vs. THAL SNS032 sgRNA	-24.51	-52,03 to 3,011	No	ns	0.1185	C-J
THZ1 0,1uM empty vs. NPV2 empty	17.11	-10,41 to 44,64	No	ns	0.5833	C-K
THZ1 0,1uM empty vs. NPV2 sgRNA	-0.6853	-28,21 to 26,84	No	ns	>0,9999	C-L
THZ1 0,1uM empty vs. DRB empty	5.001	-22,52 to 32,52	No	ns	>0,9999	C-M
THZ1 0,1uM empty vs. DRB sgRNA	1.378	-26,15 to 28,90	No	ns	>0,9999	C-N
THZ1 0,1uM sgRNA vs. THZ1 1uM empty	69.74	42,21 to 97,26	Yes	****	<0,0001	D-E
THZ1 0,1uM sgRNA vs. THZ1 1uM sgRNA	71.2	43,68 to 98,72	Yes	****	<0,0001	D-F
THZ1 0,1uM sgRNA vs. TZH531 empty	-6.952	-34,47 to 20,57	No	ns	0.9994	D-G
THZ1 0,1uM sgRNA vs. THZ531 sgRNA	-13.2	-40,72 to 14,32	No	ns	0.8774	D-H
THZ1 0,1uM sgRNA vs. THAL SNS032 empty	-8.152	-35,67 to 19,37	No	ns	0.9972	D-I
THZ1 0,1uM sgRNA vs. THAL SNS032 sgRNA	-22.11	-49,63 to 5,416	No	ns	0.2192	D-J
THZ1 0,1uM sgRNA vs. NPV2 empty	19.52	-8,006 to 47,04	No	ns	0.3857	D-K
THZ1 0,1uM sgRNA vs. NPV2 sgRNA	1.719	-25,80 to 29,24	No	ns	>0,9999	D-L
THZ1 0,1uM sgRNA vs. DRB empty	7.406	-20,12 to 34,93	No	ns	0.9989	D-M
THZ1 0,1uM sgRNA vs. DRB sgRNA	3.782	-23,74 to 31,30	No	ns	>0,9999	D-N
THZ1 1uM empty vs. THZ1 1uM sgRNA	1.463	-26,06 to 28,99	No	ns	>0,9999	E-F
THZ1 1uM empty vs. TZH531 empty	-76.69	-104,2 to -49,17	Yes	****	<0,0001	E-G
THZ1 1uM empty vs. THZ531 sgRNA	-82.94	-110,5 to -55,42	Yes	****	<0,0001	E-H
THZ1 1uM empty vs. THAL SNS032 empty	-77.89	-105,4 to -50,37	Yes	****	<0,0001	E-I
THZ1 1uM empty vs. THAL SNS032 sgRNA	-91.84	-119,4 to -64,32	Yes	****	<0,0001	E-J
THZ1 1uM empty vs. NPV2 empty	-50.22	-77,74 to -22,70	Yes	****	<0,0001	E-K
THZ1 1uM empty vs. NPV2 sgRNA	-68.02	-95,54 to -40,50	Yes	****	<0,0001	E-L
THZ1 1uM empty vs. DRB empty	-62.33	-89,85 to -34,81	Yes	****	<0,0001	E-M
THZ1 1uM empty vs. DRB sgRNA	-65.96	-93,48 to -38,43	Yes	****	<0,0001	E-N
THZ1 1uM sgRNA vs. TZH531 empty	-78.15	-105,7 to -50,63	Yes	****	<0,0001	F-G
THZ1 1uM sgRNA vs. THZ531 sgRNA	-84.4	-111,9 to -56,88	Yes	****	<0,0001	F-H
THZ1 1uM sgRNA vs. THAL SNS032 empty	-79.35	-106,9 to -51,83	Yes	****	<0,0001	F-I
THZ1 1uM sgRNA vs. THAL SNS032 sgRNA	-93.31	-120,8 to -65,78	Yes	****	<0,0001	F-J
THZ1 1uM sgRNA vs. NPV2 empty	-51.68	-79,21 to -24,16	Yes	****	<0,0001	F-K
THZ1 1uM sgRNA vs. NPV2 sgRNA	-69.48	-97,00 to -41,96	Yes	****	<0,0001	F-L
THZ1 1uM sgRNA vs. DRB empty	-63.79	-91,32 to -36,27	Yes	****	<0,0001	F-M
THZ1 1uM sgRNA vs. DRB sgRNA	-67.42	-94,94 to -39,90	Yes	****	<0,0001	F-N
TZH531 empty vs. THZ531 sgRNA	-6.25	-33,77 to 21,27	No	ns	0.9998	G-H
TZH531 empty vs. THAL SNS032 empty	-1.2	-28,72 to 26,32	No	ns	>0,9999	G-I
TZH531 empty vs. THAL SNS032 sgRNA	-15.16	-42,68 to 12,37	No	ns	0.7462	G-J
TZH531 empty vs. NPV2 empty	26.47	-1,054 to 53,99	No	ns	0.0683	G-K
TZH531 empty vs. NPV2 sgRNA	8.671	-18,85 to 36,19	No	ns	0.995	G-L
TZH531 empty vs. DRB empty	14.36	-13,17 to 41,88	No	ns	0.8051	G-M
TZH531 empty vs. DRB sgRNA	10.73	-16,79 to 38,26	No	ns	0.9699	G-N
THZ531 sgRNA vs. THAL SNS032 empty	5.05	-22,47 to 32,57	No	ns	>0,9999	H-I
THZ531 sgRNA vs. THAL SNS032 sgRNA	-8.905	-36,43 to 18,62	No	ns	0.9936	H-J
THZ531 sgRNA vs. NPV2 empty	32.72	5,196 to 60,24	Yes	**	0.0096	H-K
THZ531 sgRNA vs. NPV2 sgRNA	14.92	-12,60 to 42,44	No	ns	0.7642	H-L
THZ531 sgRNA vs. DRB empty	20.61	-6,915 to 48,13	No	ns	0.3083	H-M
THZ531 sgRNA vs. DRB sgRNA	16.98	-10,54 to 44,51	No	ns	0.5944	H-N
THAL SNS032 empty vs. THAL SNS032 sgRNA	-13.96	-41,48 to 13,57	No	ns	0.8322	I-J
THAL SNS032 empty vs. NPV2 empty	27.67	0,1462 to 55,19	Yes	*	0.0478	I-K
THAL SNS032 empty vs. NPV2 sgRNA	9.871	-17,65 to 37,39	No	ns	0.9845	I-L
THAL SNS032 empty vs. DRB empty	15.56	-11,97 to 43,08	No	ns	0.7143	I-M
THAL SNS032 empty vs. DRB sgRNA	11.93	-15,59 to 39,46	No	ns	0.9353	I-N
THAL SNS032 sgRNA vs. NPV2 empty	41.62	14,10 to 69,15	Yes	***	0.0005	J-K
THAL SNS032 sgRNA vs. NPV2 sgRNA	23.83	-3,697 to 51,35	No	ns	0.1423	J-L
THAL SNS032 sgRNA vs. DRB empty	29.51	1,990 to 57,04	Yes	*	0.0271	J-M
THAL SNS032 sgRNA vs. DRB sgRNA	25.89	-1,634 to 53,41	No	ns	0.0808	J-N
NPV2 empty vs. NPV2 sgRNA	-17.8	-45,32 to 9,725	No	ns	0.5247	K-L
NPV2 empty vs. DRB empty	-12.11	-39,63 to 15,41	No	ns	0.9286	K-M
NPV2 empty vs. DRB sgRNA	-15.74	-43,26 to 11,79	No	ns	0.6998	K-N
NPV2 sgRNA vs. DRB empty	5.687	-21,84 to 33,21	No	ns	>0,9999	L-M
NPV2 sgRNA vs. DRB sgRNA	2.063	-25,46 to 29,59	No	ns	>0,9999	L-N
DRB empty vs. DRB sgRNA	-3.624	-31,15 to 23,90	No	ns	>0,9999	M-N
Test details	Mean 1	Mean 2	Mean Diff,	SE of diff,	n1	n2
DMSO empty vs. DMSO sgRNA	329	315	14.05	7.519	3	3
DMSO empty vs. THZ1 0,1uM empty	329	247.6	81.38	7.519	3	3
DMSO empty vs. THZ1 0,1uM sgRNA	329	250	78.98	7.519	3	3
DMSO empty vs. THZ1 1uM empty	329	180.3	148.7	7.519	3	3
DMSO empty vs. THZ1 1uM sgRNA	329	178.8	150.2	7.519	3	3
DMSO empty vs. TZH531 empty	329	257	72.03	7.519	3	3
DMSO empty vs. THZ531 sgRNA	329	263.2	65.78	7.519	3	3
DMSO empty vs. THAL SNS032 empty	329	258.2	70.83	7.519	3	3
DMSO empty vs. THAL SNS032 sgRNA	329	272.1	56.87	7.519	3	3
DMSO empty vs. NPV2 empty	329	230.5	98.5	7.519	3	3
DMSO empty vs. NPV2 sgRNA	329	248.3	80.7	7.519	3	3
DMSO empty vs. DRB empty	329	242.6	86.39	7.519	3	3
DMSO empty vs. DRB sgRNA	329	246.2	82.76	7.519	3	3
DMSO sgRNA vs. THZ1 0,1uM empty	315	247.6	67.34	7.519	3	3
DMSO sgRNA vs. THZ1 0,1uM sgRNA	315	250	64.93	7.519	3	3
DMSO sgRNA vs. THZ1 1uM empty	315	180.3	134.7	7.519	3	3
DMSO sgRNA vs. THZ1 1uM sgRNA	315	178.8	136.1	7.519	3	3
DMSO sgRNA vs. TZH531 empty	315	257	57.98	7.519	3	3
DMSO sgRNA vs. THZ531 sgRNA	315	263.2	51.73	7.519	3	3
DMSO sgRNA vs. THAL SNS032 empty	315	258.2	56.78	7.519	3	3
DMSO sgRNA vs. THAL SNS032 sgRNA	315	272.1	42.82	7.519	3	3
DMSO sgRNA vs. NPV2 empty	315	230.5	84.45	7.519	3	3
DMSO sgRNA vs. NPV2 sgRNA	315	248.3	66.65	7.519	3	3
DMSO sgRNA vs. DRB empty	315	242.6	72.34	7.519	3	3
DMSO sgRNA vs. DRB sgRNA	315	246.2	68.71	7.519	3	3
THZ1 0,1uM empty vs. THZ1 0,1uM sgRNA	247.6	250	-2.404	7.519	3	3
THZ1 0,1uM empty vs. THZ1 1uM empty	247.6	180.3	67.33	7.519	3	3
THZ1 0,1uM empty vs. THZ1 1uM sgRNA	247.6	178.8	68.8	7.519	3	3
THZ1 0,1uM empty vs. TZH531 empty	247.6	257	-9.356	7.519	3	3
THZ1 0,1uM empty vs. THZ531 sgRNA	247.6	263.2	-15.61	7.519	3	3
THZ1 0,1uM empty vs. THAL SNS032 empty	247.6	258.2	-10.56	7.519	3	3
THZ1 0,1uM empty vs. THAL SNS032 sgRNA	247.6	272.1	-24.51	7.519	3	3
THZ1 0,1uM empty vs. NPV2 empty	247.6	230.5	17.11	7.519	3	3
THZ1 0,1uM empty vs. NPV2 sgRNA	247.6	248.3	-0.6853	7.519	3	3
THZ1 0,1uM empty vs. DRB empty	247.6	242.6	5.001	7.519	3	3
THZ1 0,1uM empty vs. DRB sgRNA	247.6	246.2	1.378	7.519	3	3
THZ1 0,1uM sgRNA vs. THZ1 1uM empty	250	180.3	69.74	7.519	3	3
THZ1 0,1uM sgRNA vs. THZ1 1uM sgRNA	250	178.8	71.2	7.519	3	3
THZ1 0,1uM sgRNA vs. TZH531 empty	250	257	-6.952	7.519	3	3
THZ1 0,1uM sgRNA vs. THZ531 sgRNA	250	263.2	-13.2	7.519	3	3
THZ1 0,1uM sgRNA vs. THAL SNS032 empty	250	258.2	-8.152	7.519	3	3
THZ1 0,1uM sgRNA vs. THAL SNS032 sgRNA	250	272.1	-22.11	7.519	3	3
THZ1 0,1uM sgRNA vs. NPV2 empty	250	230.5	19.52	7.519	3	3
THZ1 0,1uM sgRNA vs. NPV2 sgRNA	250	248.3	1.719	7.519	3	3
THZ1 0,1uM sgRNA vs. DRB empty	250	242.6	7.406	7.519	3	3
THZ1 0,1uM sgRNA vs. DRB sgRNA	250	246.2	3.782	7.519	3	3
THZ1 1uM empty vs. THZ1 1uM sgRNA	180.3	178.8	1.463	7.519	3	3
THZ1 1uM empty vs. TZH531 empty	180.3	257	-76.69	7.519	3	3
THZ1 1uM empty vs. THZ531 sgRNA	180.3	263.2	-82.94	7.519	3	3
THZ1 1uM empty vs. THAL SNS032 empty	180.3	258.2	-77.89	7.519	3	3
THZ1 1uM empty vs. THAL SNS032 sgRNA	180.3	272.1	-91.84	7.519	3	3
THZ1 1uM empty vs. NPV2 empty	180.3	230.5	-50.22	7.519	3	3
THZ1 1uM empty vs. NPV2 sgRNA	180.3	248.3	-68.02	7.519	3	3
THZ1 1uM empty vs. DRB empty	180.3	242.6	-62.33	7.519	3	3
THZ1 1uM empty vs. DRB sgRNA	180.3	246.2	-65.96	7.519	3	3
THZ1 1uM sgRNA vs. TZH531 empty	178.8	257	-78.15	7.519	3	3
THZ1 1uM sgRNA vs. THZ531 sgRNA	178.8	263.2	-84.4	7.519	3	3
THZ1 1uM sgRNA vs. THAL SNS032 empty	178.8	258.2	-79.35	7.519	3	3
THZ1 1uM sgRNA vs. THAL SNS032 sgRNA	178.8	272.1	-93.31	7.519	3	3
THZ1 1uM sgRNA vs. NPV2 empty	178.8	230.5	-51.68	7.519	3	3
THZ1 1uM sgRNA vs. NPV2 sgRNA	178.8	248.3	-69.48	7.519	3	3
THZ1 1uM sgRNA vs. DRB empty	178.8	242.6	-63.79	7.519	3	3
THZ1 1uM sgRNA vs. DRB sgRNA	178.8	246.2	-67.42	7.519	3	3
TZH531 empty vs. THZ531 sgRNA	257	263.2	-6.25	7.519	3	3
TZH531 empty vs. THAL SNS032 empty	257	258.2	-1.2	7.519	3	3
TZH531 empty vs. THAL SNS032 sgRNA	257	272.1	-15.16	7.519	3	3
TZH531 empty vs. NPV2 empty	257	230.5	26.47	7.519	3	3
TZH531 empty vs. NPV2 sgRNA	257	248.3	8.671	7.519	3	3
TZH531 empty vs. DRB empty	257	242.6	14.36	7.519	3	3
TZH531 empty vs. DRB sgRNA	257	246.2	10.73	7.519	3	3
THZ531 sgRNA vs. THAL SNS032 empty	263.2	258.2	5.05	7.519	3	3
THZ531 sgRNA vs. THAL SNS032 sgRNA	263.2	272.1	-8.905	7.519	3	3
THZ531 sgRNA vs. NPV2 empty	263.2	230.5	32.72	7.519	3	3
THZ531 sgRNA vs. NPV2 sgRNA	263.2	248.3	14.92	7.519	3	3
THZ531 sgRNA vs. DRB empty	263.2	242.6	20.61	7.519	3	3
THZ531 sgRNA vs. DRB sgRNA	263.2	246.2	16.98	7.519	3	3
THAL SNS032 empty vs. THAL SNS032 sgRNA	258.2	272.1	-13.96	7.519	3	3
THAL SNS032 empty vs. NPV2 empty	258.2	230.5	27.67	7.519	3	3
THAL SNS032 empty vs. NPV2 sgRNA	258.2	248.3	9.871	7.519	3	3
THAL SNS032 empty vs. DRB empty	258.2	242.6	15.56	7.519	3	3
THAL SNS032 empty vs. DRB sgRNA	258.2	246.2	11.93	7.519	3	3
THAL SNS032 sgRNA vs. NPV2 empty	272.1	230.5	41.62	7.519	3	3
THAL SNS032 sgRNA vs. NPV2 sgRNA	272.1	248.3	23.83	7.519	3	3
THAL SNS032 sgRNA vs. DRB empty	272.1	242.6	29.51	7.519	3	3
THAL SNS032 sgRNA vs. DRB sgRNA	272.1	246.2	25.89	7.519	3	3
NPV2 empty vs. NPV2 sgRNA	230.5	248.3	-17.8	7.519	3	3
NPV2 empty vs. DRB empty	230.5	242.6	-12.11	7.519	3	3
NPV2 empty vs. DRB sgRNA	230.5	246.2	-15.74	7.519	3	3
NPV2 sgRNA vs. DRB empty	248.3	242.6	5.687	7.519	3	3
NPV2 sgRNA vs. DRB sgRNA	248.3	246.2	2.063	7.519	3	3
DRB empty vs. DRB sgRNA	242.6	246.2	-3.624	7.519	3	3

[truncated: 22 more sheets: Fig.4a, Fig. 4c, fig 6b, fig 6e, fig 6g, fig 7b, fig 7c, fig 7e, Fig.8a, Fig.8b, Fig.8c, Fig.S1, Fig. S2b, Fig. S3d, Fig. S3e, Fig. S4c, Fig. S5, Fig. S6a, Fig. S6b, Fig. S6c …]
